# Supplementary material for: Grain Boundaries Assisted Construction of Pt Colloidosomes for Tumor Catalytic Therapy Enhanced by Near-Infrared Photon-Excited Hot Electrons
Source: Research Square preprint supplement (doi:10.21203/rs.3.rs-2498108/v1), 2023-06-12
Supplement: Supplementary file 1 [file 8b765e814add7fa1db4a77f5.docx]

**Supplementary Information**

**Grain Boundaries Assisted Construction of Pt Colloidosomes for Tumor Catalytic Therapy Enhanced by Near-Infrared Photon-Excited Hot Electrons**

*Sihan Jia,b,1, Xianglong Zhaob,c,1, Pengfei Lia,1, Yunyu Caia,*, Kun Mac,*, Changhao Wangb,c, Haibin Tanga, Shuxian Weia,b, Xiaohu Chenga,b, Lingli Wua,b, Yixing Yea, Junfeng Wangb,c,d,*, Changhao Lianga,b,**

a Key Laboratory of Materials Physics and Anhui Key Laboratory of Nanomaterials and Nanotechnology, Institute of Solid State Physics, Hefei Institutes of Physical Science, Chinese Academy of Sciences, Hefei 230031, China.

b University of Science and Technology of China, Hefei, 230026, China.

c High Magnetic Field Laboratory, CAS Key Laboratory of High Magnetic Field and Ion Beam Physical Biology, Hefei Institutes of Physical Science, Chinese Academy of Sciences, Hefei, 230031, P.R. China.

d Institutes of Physical Science and Information Technology, Anhui University, Hefei 230601, Anhui, PR China.

1 The authors contributed equally to this work.

* Corresponding author

Email:

yycai@issp.ac.cn; chliang@issp.ac.cn; makun@hmfl.ac.cn; junfeng@hmfl.ac.cn

**Method**

**Materials**

Ethanol, potassium permanganate (KMnO4), Disodium tetrachloroplatinate (Na2PtCl4, 99%), Sodium borohydride (NaBH4), dimethyl sulfoxide (DMSO), 3, 3′, 5, 5′-tetramethyl-benzidine (TMB) and o-phenylenediamine (OPD) were purchased from Aladdin Industrial Corporation (Shanghai, China). Methoxypoly (Ethylene Glycol) Thiol 5000 (mPEG-SH-5000) was purchased from Shanghai Toyongbio Tech Co., Ltd. (Shanghai, China). All chemical agents were used without any purification. Ultrapure water was prepared with a Milli-Q-Plus system. The specific pathogen free grade nude/female mice (4–5 months, female) were purchased from Beijing Weitonglihua Experimental Animal Technology Co. Ltd. (Beijing, China). All animal experiments were performed under the permission of Institutional Animal Care and Use Committee (IACUC) of the Hefei Institute of Physical Science, Chinese Academy of Sciences (CAS).

**Mn3O4 NPs synthesis**

The synthesis of R-Mn3O4 NPs is as follows: firstly, 3.0 g of KMnO4 was separated into 150 mL of ultrapure water, and heated to dissolve completely. Then add 5 mL of ethanol to the solution with stirring. The precipitate is filtered and washed sequentially with ionized water and ethanol for 3 times. This product was transferred as a precursor to a stainless steel autoclave, and ethanol was added to approximately 80% of the reactor volume. Put the reaction kettle in the oven and heat it at 190℃ for 4 h. In the end, the reaction system was allowed to cool naturally. The filtered reaction product was vacuum dried at 50℃ for 6 h to obtain R-Mn3O4 NPs.

The L-Mn3O4 NPs were formed by irradiating the R-Mn3O4 NPs with an unfocused pulsed laser beam. 2 mg R-Mn3O4 NPs were added into 15 mL ultrapure water to obtain the initial mixed solution. The unfocused laser parameters were as follows: wavelength of 355 nm, frequency of 20 Hz, pulse duration of 7 ns, single pulse energy of 50 mJ, and output laser power of 1 W. After 10 min irradiation, the products named L-Mn3O4 NPs were collected after centrifugation and drying at 60℃ in air.

**Preparation of Pt colloidosomes (Cs) and PEGylation**

The aforementioned 10 mg L-Mn3O4 was added into the Na2PtCl4 solution (4 mg·mL−1) to obtain the initial mixed solution. For comparison, we mixed Na2PtCl4 solutions with different dose of L-Mn3O4 NPs to tune the molar ratio of Pt/Mn in the final products. The corresponding mass ratio of Na2PtCl4 to Mn3O4 in these mixed solutions was tuned as 2:1, 6:1, 8:1, and 10:1. Then, ultrapure water was added into the above-mentioned mixed solutions until the volume reached 50 mL. All the solutions were kept under 70℃ by oil bath with gentle stirring for 3 h. After cooling to room temperature, the product was isolated by centrifugation and purified in ultrapure water for several times. Finally, we dropped 10 mL NaBH4 solution (0.5 mg·mL−1) into the solution of the above products, and purified for several times to obtain Pt Cs. The same preparation process was applied to Mn3O4 NPs, and the product was named as R-Pt Cs.

For PEGylation, 10 mg R-Pt Cs or Pt Cs was dispersed into the 50 mL DMF solution with 2 mg·mL−1 mPEG-SH 5000, and the mixture was stirred for 16 h at 50℃. The sample was isolated by centrifugation and washed with ultrapure water for several times. The final product was dried for further test.

**Characterization**

The morphology and structure of the products were investigated via field-emission scanning electron microscopy (SEM, SU8020) and Transmission electron microscopy (TEM, JEOL JEM-2010, Japan). The X-ray diffraction (XRD) pattern of the products was recorded by a Rigaku X-ray diffractometer (G2234) with Cu-Kα radiation (λ = 0.15419 nm). The optical absorption spectra were gathered with a ultraviolet–visible (UV–Vis) spectrophotometer (Cary-5E). Fourier transform infrared (FTIR) spectra were recorded with an FTIR apparatus (Nicolet 8700). The element concentration was measured by inductively coupled plasma-molar emission spectroscopy (Optima 7300 DV). High-angle annular dark-field scanning transmission electron microscopic images, energy-dispersive X-ray spectroscopy (EDX) elemental mapping images, and line scans were recorded on a JEM-ARM 200F instrument. The X-ray photoelectron spectroscopy (XPS) system (Thermo ESCALAB 250) was used to analyze the surface element composition of samples. The binding energy was calibrated against C 1s (284.6 eV). The surface area of the samples was determined by Specific Surface and Porosity Analyzer (ASAP 2460).

**Spin-polarized density function theory (DFT) calculations**

The spin-polarized DFT calculations were performed based on the generalized gradient approximation (GGA), as implemented in the VASP 5.4.4 package1. Electronic exchange and correlation are described by Perdew−Burke−Ernzerhof (PBE) functional2. All-electron plane-wave basis sets with the projector augmented wave (PAW) potentials are adopted with 2s22p4, 3s23p5, 3d54s2, and 5d96s1 treated as valence electron configuration for O, Cl, Mn and Pt respectively, and the cutoff energy is set to be 450 eV. A dense enough k points sampling is checked with energy tolerance in 1 meV/atom and the force tolerance is set to be 0.02 eV/Å. The surfaces are represented by periodic slab models. A vacuum larger than 12 Å thick is inserted in each model to avoid interaction with imaging free surfaces. Similarly, the lattice parameters of each slab supercell is also large enough to avoid interaction between the adsorbed PtCl4 molecular and its image. The optB88-vdW functional was used to calculate the adsorption energy, which is an efficient method to approximately account for the long-range vdW interaction3.

**Oxidase (OXD) mimic activity of Pt Cs.**

By monitoring the absorption peaks at 652 nm for oxidized TMB (TMBox) and 420 nm for oxidized OPD (OPDox), the catalytic activity of Pt Cs was studied. Pt Cs are suspended in 0.2 M acetate buffer or 0.2 M PBS buffer (pH = 5.0, 6.5 and 7.4), and then TMB was added (0.8 mM). In order to simulate anoxic conditions, before adding Pt Cs, N2 gas was introduced into the solution for 20 min to remove dissolved O2. For investigating the impact of Pt/Mn molar ratio on the OXD mimic activity of Pt Cs, we took TMB as the OXD substrate. The absorbance of Pt Cs (final concentration is 33.3 μg·mL−1), Pt NPs and Mn3O4 NPs at 652 nm were measured in 10 min. The concentration of Pt NPs and Mn3O4 NPs was decided by the contents of Pt and Mn in the Pt Cs solution.

For exploring the OXD mimic activity of Pt Cs under NIR light irradiation, OPD (2.4 mM) and Pt Cs (100 μg·mL−1) were added to 1 mL of acetate buffer (pH = 5.0), which was irradiated the by 808 nm laser with different energy densities (1, 1.5, 2 and 3 W·cm−2) for 10 min. We tested the OPDox concentration in the solution at one-minute intervals by measuring the absorbance at 420 nm and drew a curve. To exclude the effect of 808 nm laser on the oxidation of OPD, light illumination experiments were conducted at different laser power densities (1, 1.5, 2 and 3 W cm−2) for the acetate buffer (pH = 5.0) without adding Pt Cs. After 10 min of incubation, the absorbance at 420 nm was measured for comparison.

**Catalase (CAT) mimic activity of Pt Cs**

The O2 concentration in the solution was measured by a portable dissolved oxygen meter (JPBJ-610L, Shanghai LEICI). H2O2 (100 μM) was added to 10 mL of acetate buffer or PBS buffer (pH = 5.0, 6.5 and 7.4) to form a pre-made solution. The Pt Cs (100 μg·mL−1) was subsequently added to such pre-made solution in rubber stopper glass bottle. An oxygen electrode probe was inserted into the flask through this rubber stopper, and the oxygen concentration of the solution was measured in real time to observe the effect of pH. In order to explore the effect of Pt/Mn molar ratio, the oxygen concentration changes with evolution of Pt/Mn ratios in Pt Cs solution (200 μg·mL−1) within 10 min were tested. The concentration of Pt NPs and Mn3O4 NPs was decided by the contents of Pt and Mn in the Pt Cs solution.

For exploring the CAT mimic activity of Pt Cs under NIR light irradiation, H2O2 (100 μM) was added to 10 mL of acetate buffer (pH = 5.0) to form a pre-made solution, then Pt Cs (100 μg·mL−1) was added. NIR light illumination experiments was carried out by the 808 nm laser with different power densities (1, 1.5, 2 and 3 W·cm−2) for 10 min. An oxygen electrode probe was used to measure the oxygen concentration of the solution in real time. To exclude H2O2 decomposition induced by laser or temperature, the solution of 1 mL acetate buffer containing 12.5 μM H2O2 was selected, and the concentration change of H2O2 was monitored at different laser power densities (1, 1.5, 2 and 3 W·cm−2) and different temperatures conditions (20, 30, 40, 50 and 60℃). After 10 min of incubation, the consumed concentration of H2O2 was calculated based on the decrease of absorbance at 240 nm.

***In vitro* photothermal performance**

Both R-Pt Cs and Pt Cs solutions were illuminated with an 808 nm laser (MDL-III-808 nm, Changchun New Industries Optoelectronics Tech. Co., Ltd, Changchun, China) for 10 min at room temperature. The temperature was monitored by an IR thermal camera (FLIR System E40). Ultrapure water was irradiated in the same way as a control group. All solutions were irradiated at 2 W·cm–2 for three cycles, including a ten-min heating period and a natural cooling period, to further verify the photothermal stability. The power densities of 808 nm laser were tuned from 1 W·cm−2 to 3 W·cm−2 to irradiate the Pt Cs (100 μg·mL–1) and the subsequent temperature change in 10 min was recorded.

**Calculation of photothermal conversion efficiency (η)**

The heating and cooling temperatures of the Pt Cs (100 μg·mL–1) solution were recorded. Following Roper’s report, the η was measured applying the following formula:

(1)

where *h* is the thermal conversion efficiency of the system, S is the surface area of the container, *Tmax* is the equilibrium temperature of the sample solution, *Tsurr* represents the surrounding ambient temperature, *I* is the power density of the 808 nm continuous laser, and *Aλ* is the absorbance of Pt Cs solution at λ = 808 nm4. Additionally, *Qdis* represents the heat loss due to the light absorption of the container itself, and it was determined as *Qdis* = (5.4 × 10–4) I. To calculate *hS*, another equation was introduced:

(2)

where *m* is the mass of the sample, *Cwater* is the heat capacity of water (4.2 J·g–1·K–1), and *τs* is the sample system time constant. By substituting these values into these equations, the 808 nm laser *η* of Pt Cs was calculated as 23.9%, and the *η* of R-Pt Cs was calculated as 18.9%.

**Hot electron generation**

Two parallel experiments under different temperature conditions were designed to verify the generation of hot electron in five samples: Pt Cs, R-Pt Cs, Pt NPs, Mn3O4 NPs, and blank control.

Parallel experiment 1: all experiments were carried out with an initial temperature of 25℃ (room temperature). To explore the contribution of the unavoidable photothermal effect under NIR light irradiation, we added the heating experiments using water bath heater when studying the enzyme-like activities of the five groups. For OXD mimic activity, we mixed 900 μL of acetate buffer (pH = 5.0), 50 μL of OPD solution (2.4 mM) and 50 μL of different sample solutions at room temperature. We analyzed activity change of the group heated by water-bath condition and the group irradiated by 808 nm laser (2 W·cm−2). After 5 min of reaction, the solution volume was diluted to 3 mL and the characteristic absorbance was measured. For the 808 nm laser group, the OPD solution was added after the reaction system was irradiated by the laser for 10 min. For the water bath group, the temperature of the water bath was the same as the temperature of the reaction system irradiated by laser for 10 min. The water bath group was placed in water for 20 min and then the OPD solution was added.

Parallel experiment 2: all experiments were carried out under ice-water bath condition to avoid heat induced by laser irradiation. For OXD mimic activity analysis, 900 μL of acetate buffer (pH = 5.0) was placed in an ice-water bath for 20 min, and then 50 μL TMB solution (2.4 mM) and 50 μL different sample solutions were added. The experiment was divided into two groups: 808 nm laser (2 W·cm−2) irradiation group and no light irradiation group. The duration for laser beam irradiation was 5 min. Finally, we measured the absorption spectra for all sample solutions. In these experiments, Pt Cs and R-Pt Cs have the same concentration of 100 μg·mL−1, and the concentrations of Pt NPs and Mn3O4 NPs were decided by the elemental contents of Pt and Mn in R-Pt Cs.

In the parallel experiment 1 and parallel experiment 2, the experimental conditions for the CAT mimic activity of the samples were the same as the OXD mimic activity analysis, but the reaction system is 10 mL and the detection method is as mentioned above. For different samples, Pt Cs and R-Pt Cs have the same concentration of 100 μg·mL−1, and the concentrations of Pt NPs and Mn3O4 NPs were decided by the elemental contents of Pt and Mn in R-Pt Cs. The final concentration of H2O2 in system is 100 μM.

In the parallel experiment 1 and parallel experiment 2, the experimental conditions for the self-cascade catalysis activity of the samples were the same as the OXD mimic activity analysis, except for the addition of H2O2 with the final concentration of 100 μM in the reaction system.

**Finite difference time-domain (FDTD) simulation.**

FDTD simulations were carried out using FDTD simulation software (Lumerical Co. Ltd). Plane wave was used as the light source at 808 nm. Periodic boundary was used along the x-axis and y-axis, and the perfect match layer (PML) boundary was used along the z-axis. Mesh size was set as 0.1 nm for the structure during FDTD simulations.

**Photocurrent measurements.**

We added 1 mg samples (Pt Cs, R-Pt Cs, Pt NPs or Mn3O4 NPs) and 20 μL nafion into 500 μL ethanol, and dispersed the mixture for 20 min with an ultrasonic cleaner until the mixture is uniform. Then we dropped them on the conductive surface of FTO glass with an area of 1 cm2, and dried them as working electrodes. All the photoelectrochemical experiments were conducted in a conventional three-electrode system by electrochemical analyzer (CHI-660E, Shanghai Chenhua). Counter electrode was a Pt plate while reference electrode was Ag/AgCl electrode. 0.1 M Na2SO4 aqueous solution was used as the electrolyte. Photocurrent is measured by chronoamperometry with a sampling interval of 0.02 s. The photoelectrochemical experiments without the oxygen was carried out by saturating with N2 for 30 min. and 808 nm laser with a power density of 2 W·cm–2 was the light source.

**The determination of catalytic kinetics.**

The kinetic assays of Pt Cs using OPD as substrate were also performed. All reactions were monitored by measuring the initial reaction rate of different OPD concentrations (0.02, 0.04, 0.08, 0.17, 0.35 and 0.70 mM), then the Km and Vmax were calculated based on the Michaelis–Menten saturation curve. The kinetic analysis of Pt Cs under NIR light used an 808 nm laser (2 W·cm−2) as the light source. the absorbance change at 420 nm of the system was recorded, and a series of initial reaction rates were calculated by formula (3) (with a *ε* of 1.67 × 104 M−1·cm−1 for OPDox at 420 nm). Then, we fitted the curve according to formula (4): where *v0* is the initial velocity, *Vmax* is the maximal reaction velocity, *[S]* is the concentration of OPD and *Km* is the Michaelis constant5.

(3)

(4)

Meanwhile, the kinetic assays of Pt Cs using H2O2 as substrate were also performed. All reactions were monitored by measuring the initial reaction rate of different H2O2 concentrations (0.00625, 0.0125, 0.025, 0.05, 0.1 and 0.2 mM), then *Km* and *Vmax* were calculated based on the Michaelis–Menten saturation curve. The kinetic analysis of Pt Cs under NIR light used an 808 nm laser (2 W·cm−2) as the light source.

**ESR measurements.**

For O2•− detection, 30 μL DMSO was mixed with 10 μL DMPO, 2 μL Pt Cs, 8 μL acetate buffer (pH = 5.0, 0.2 M). After incubation of 5 min, ESR spectra were recorded. For **·**OH detection, 36 μL acetate buffer (pH 5.0, 200 mM) was added with 10 μL DMPO, 2 μL Pt Cs, 2 μL H2O2. After incubation of 5 min, ESR spectra were recorded. The following instrument settings were used for collecting ESR spectra: 1G field modulation, 100 G scan range, and 20 mW microwave power. We set up three groups to explore the OXD mimic activity of Pt Cs and the effect of laser on the OXD mimic activity of Pt Cs: (1) Control; (2) Pt Cs; (3) Pt Cs + 808 nm laser. In addition, six groups were designed to explore the ROS production of Pt Cs, Pt NPs, Mn3O4 NPs and the effect of laser on the ROS production of Pt Cs in a simulated tumor environment: (1) Control; (2) H2O2; (3) Mn3O4 + H2O2; (4) Pt + H2O2; (5) Pt Cs + H2O2; (6) Pt Cs + H2O2 + 808 nm laser.

**Cell culture.**

293T cell line and HL7702 cell line were cultured in high-glucose DMEM (Gibco, USA) supplemented with 10% heat-inactivated fetal bovine serum (FBS), streptomycin (100 mg·mL−1) and penicillin (100 units·mL−1). The same condition was maintained for 4T1 mouse breast tumor cell line cultured in RPMI 1640 (Gibco, USA). All the cell lines were obtained from Shanghai Institute of cells, Chinese Academy of Sciences, and cultured at 37℃ in humidified atmosphere along with 5% CO2.

**Confocal fluorescence imaging.**

In the CLSM culture vessel, 1 × 105 4T1 cells were inoculated in 1 mL RPMI 1640 with pH = 7.4 and permitted to adhere overnight. Co-incubating it with 1 mL DCFH-DA (10 μM in FBS-free RPMI 1640) at 37℃ in 5% CO2, then replacing the medium by RPMI 1640 media after 20 min. These cells were divided into the following groups with different culture conditions: (1) PBS; (2) PBS + 808 nm laser; (3) Mn3O4 NPs; (4) Pt NPs; (5) PEG/Pt Cs; (6) PEG/Pt Cs + 808 nm laser. The cells were further incubated at 37℃ in 5% CO2. After incubation for 6 h, the cells were washed with PBS for several times. Subsequently, we used the confocal laser scanning microscopy (FV 1000, Olympus, Japan) to examine the degree of intracellular ROS by inspecting the fluorescence of DCFH (λex = 488 nm, λem = 525 nm).

**Cytotoxicity measurement.**

Cytotoxicities of PEG/Pt Cs were conducted on 293T cell line, HL7702 cell line and 4T1 mouse breast tumor cells. These cells were seeded (3×103 cells in 100 μL of homologous culture medium per well) in sextuplicate in 96-well microplates, respectively, and permitted to adhere overnight. Subsequently, the culture medium was replaced by fresh culture medium including PEG/Pt Cs with the concentration of 25, 50, 100, 150 and 300 μg·mL−1, respectively. After co-incubation for 48 h, the culture medium was then replaced by FBS-free medium containing 0.6 mg·mL−1 3-[4,5-dimethylthiazol-2-yl-]-2,5-diphenyltetrazolium bromide (MTT). Lastly, we used 100 μL of DMSO to replace the MTT solution after co-incubation for 4 h. The microplate reader (Bio TekELx800, USA) is used for testing, and the cell proliferation was examined by comparing the absorbance at 490 nm between the experimental group and the control. The cytotoxicity of 808 nm laser to 4T1 cells in 24 h after incubation with the concentration of 25, 50, 100, 150 and 300 μg·mL−1 was conducted in the same way as the above mentioned.

**Live/dead cell staining assay.**

4T1 cancer cells were incubated in 6-well plates at 37℃ for 24 h. Then, previous medium was replaced by fresh medium, and co-culture for 6 h with the following conditions: (1) PBS; (2) PBS + 808 nm laser; (3) Mn3O4 NPs; (4) Pt NPs; (5) PEG/Pt Cs; (6) PEG/Pt Cs + 808 nm laser. Cells were stained with calcein AM (5 μL) and PI (10 μL) according to the product description for 0.5 h and then observed using a fluorescence inverted microscope (Olympus UHGLGPS, China)

***In vitro* and *in vivo* MRI tests.**

The *in vitro* and *in vivo* MRI tests were conducted on a 3.0 T clinical MRI instrument (GE Signa 3.0 T). To test the self-enhanced performance of longitudinal relaxivity (*r1*) and transverse relaxivity (*r2*) *in vitro*, PEG/Pt Cs with Mn concentrations of 0.12, 0.24, 0.48, 0.72 and 1.2 mM were dispersed in 1 mL of Acetate buffer solution (pH = 7.4) containing 1 wt% agarose gel, and placed in centrifuge tubes (1.5 mL) for MRI scanning. T1-weighted Fast-recovery spin-echo (FR-FSE) sequence is described as follows: TR/TE = 1000, 2000, 3000 and 4000/7.9 ms, Slice thickness = 3.0 mm, Space = 0.5 mm, Field of view (Fov) = 20 cm, Phase Fov = 0.8 cm, Freq × Phase = 384 × 256, Number of excitations (Nex) = 2, ETL = 2. T2-weighted FR-FSE sequence: TR = 3000 ms, TE = 102 ms, Slice thickness = 3.0 mm, Freq. Fov = 4.5, Phase Fov = 0.8, Freq × Phase=384 × 256. For *in vivo* MRI evaluation, PEG/Pt Cs were tail intravenous injected and monitored its performance once after the injection.

**Synergistic therapy *in vivo***

4T1-luciferase breast tumor cells tumor-bearing Balb/c mice (n = 5) were divided into 6 groups, and treated with the following conditions: (1) PBS; (2) PBS + 808 nm laser; (3) Mn3O4 NPs; (4) Pt NPs; (5) PEG/Pt Cs; (6) PEG/Pt Cs + 808 nm laser. After 6 h, tumors were exposed to laser excitation at 808 nm laser (2 W·cm−2) for 3 min. In this experiment, body weight and tumor volume were recorded monitored for 21 days. Multi-mode imaging system was used to monitor tumor volume every 3 days. Tumor volume was calculated using the equation: (Tumor Length) × (Tumor Width)2 /2. After *in vivo* therapy, tumor tissues of control and PEG/Pt Cs + 808 nm laser groups were resected, fixed with 4% formaldehyde solution and embedded in paraffin blocks. The tissue blocks were sectioned and stained with H&E, KI67 and Tunnel.

***In vivo* biocompatibility analysis.**

For the long-term biocompatibility study, mice were first intravenously injected with PEG/Pt Cs and accepted 808 nm laser irradiation. Two-week later, the mouse were euthanized and their main organs (heart, kidney, liver, lung and spleen) were collected and fixed with 4% paraformaldehyde. After embedded in paraffin, tissue samples were cryo-sliced (4 μm) before further histological analysis by standard H&E staining procedure. For hematology index evaluation, mice were sacrificed before and 21 days after intravenous injection to collect the blood samples. The examinations were carried out on specialized apparatuses in method of statistical analysis.


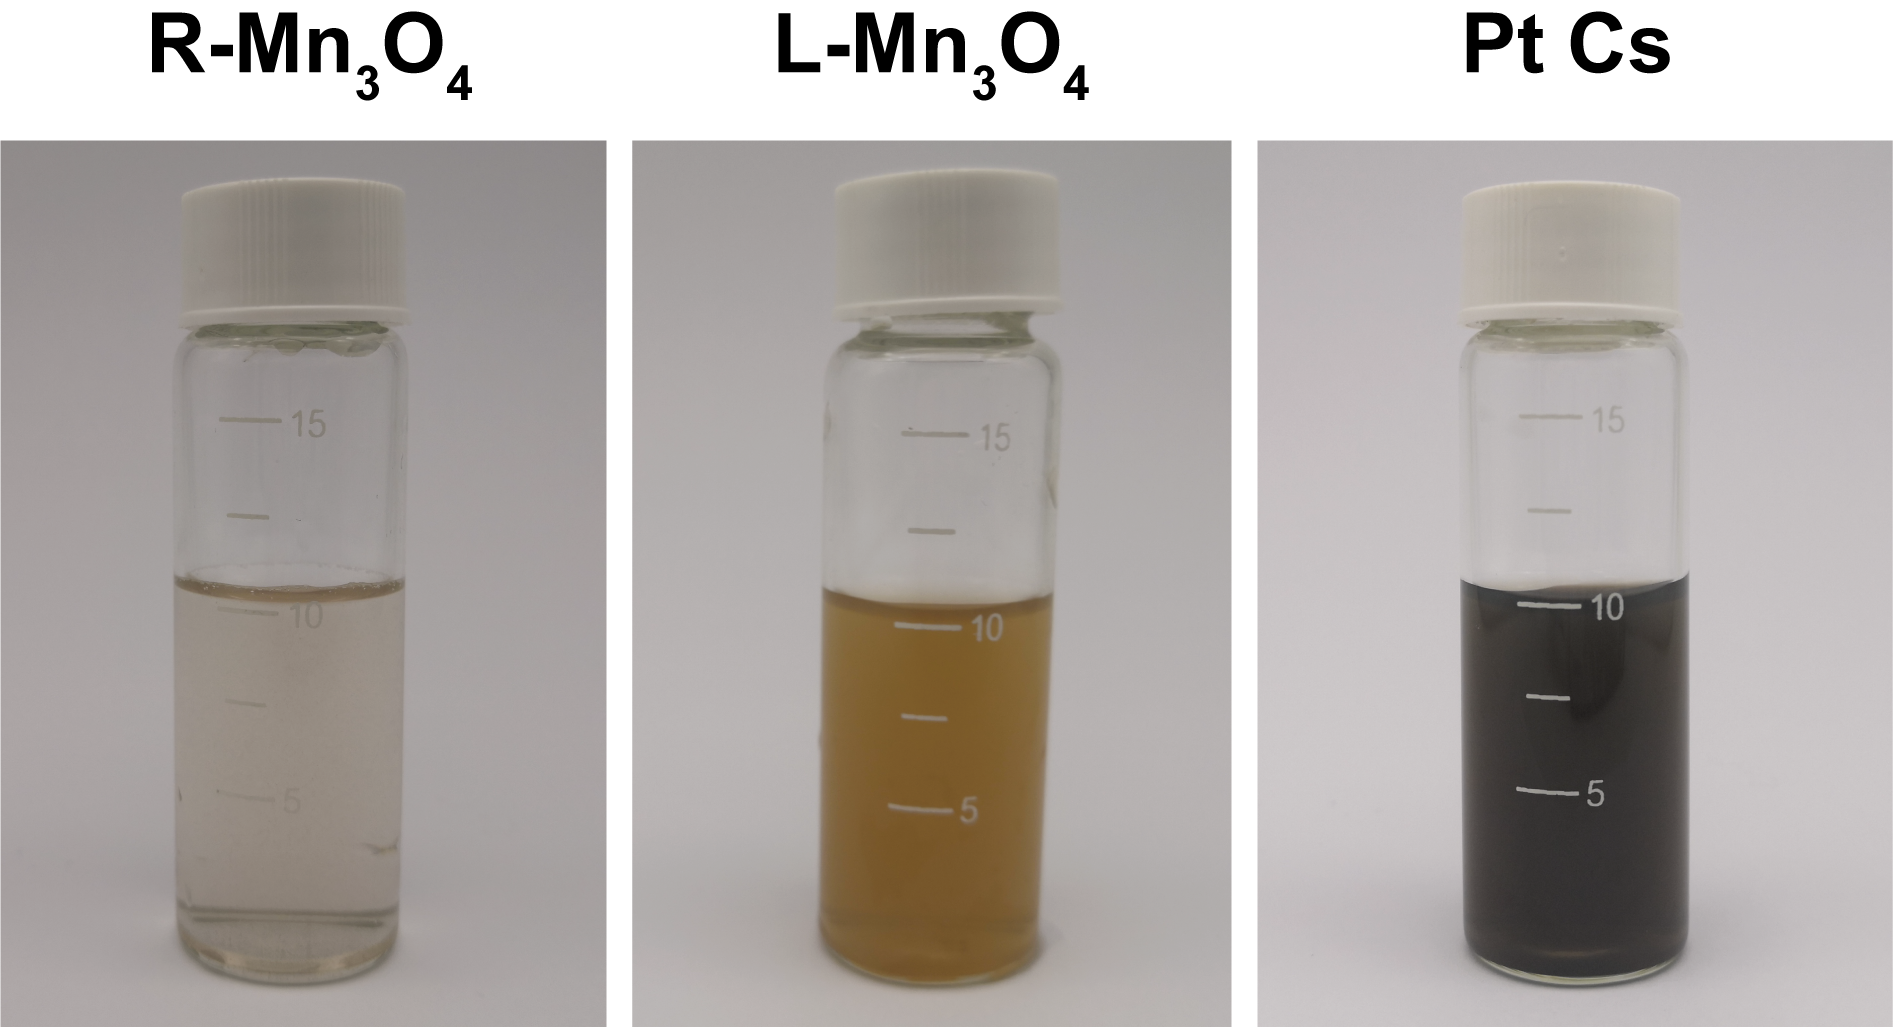


Figure S1. The digital photos of R-Mn3O4 NPs, L-Mn3O4 NPs and Pt Cs


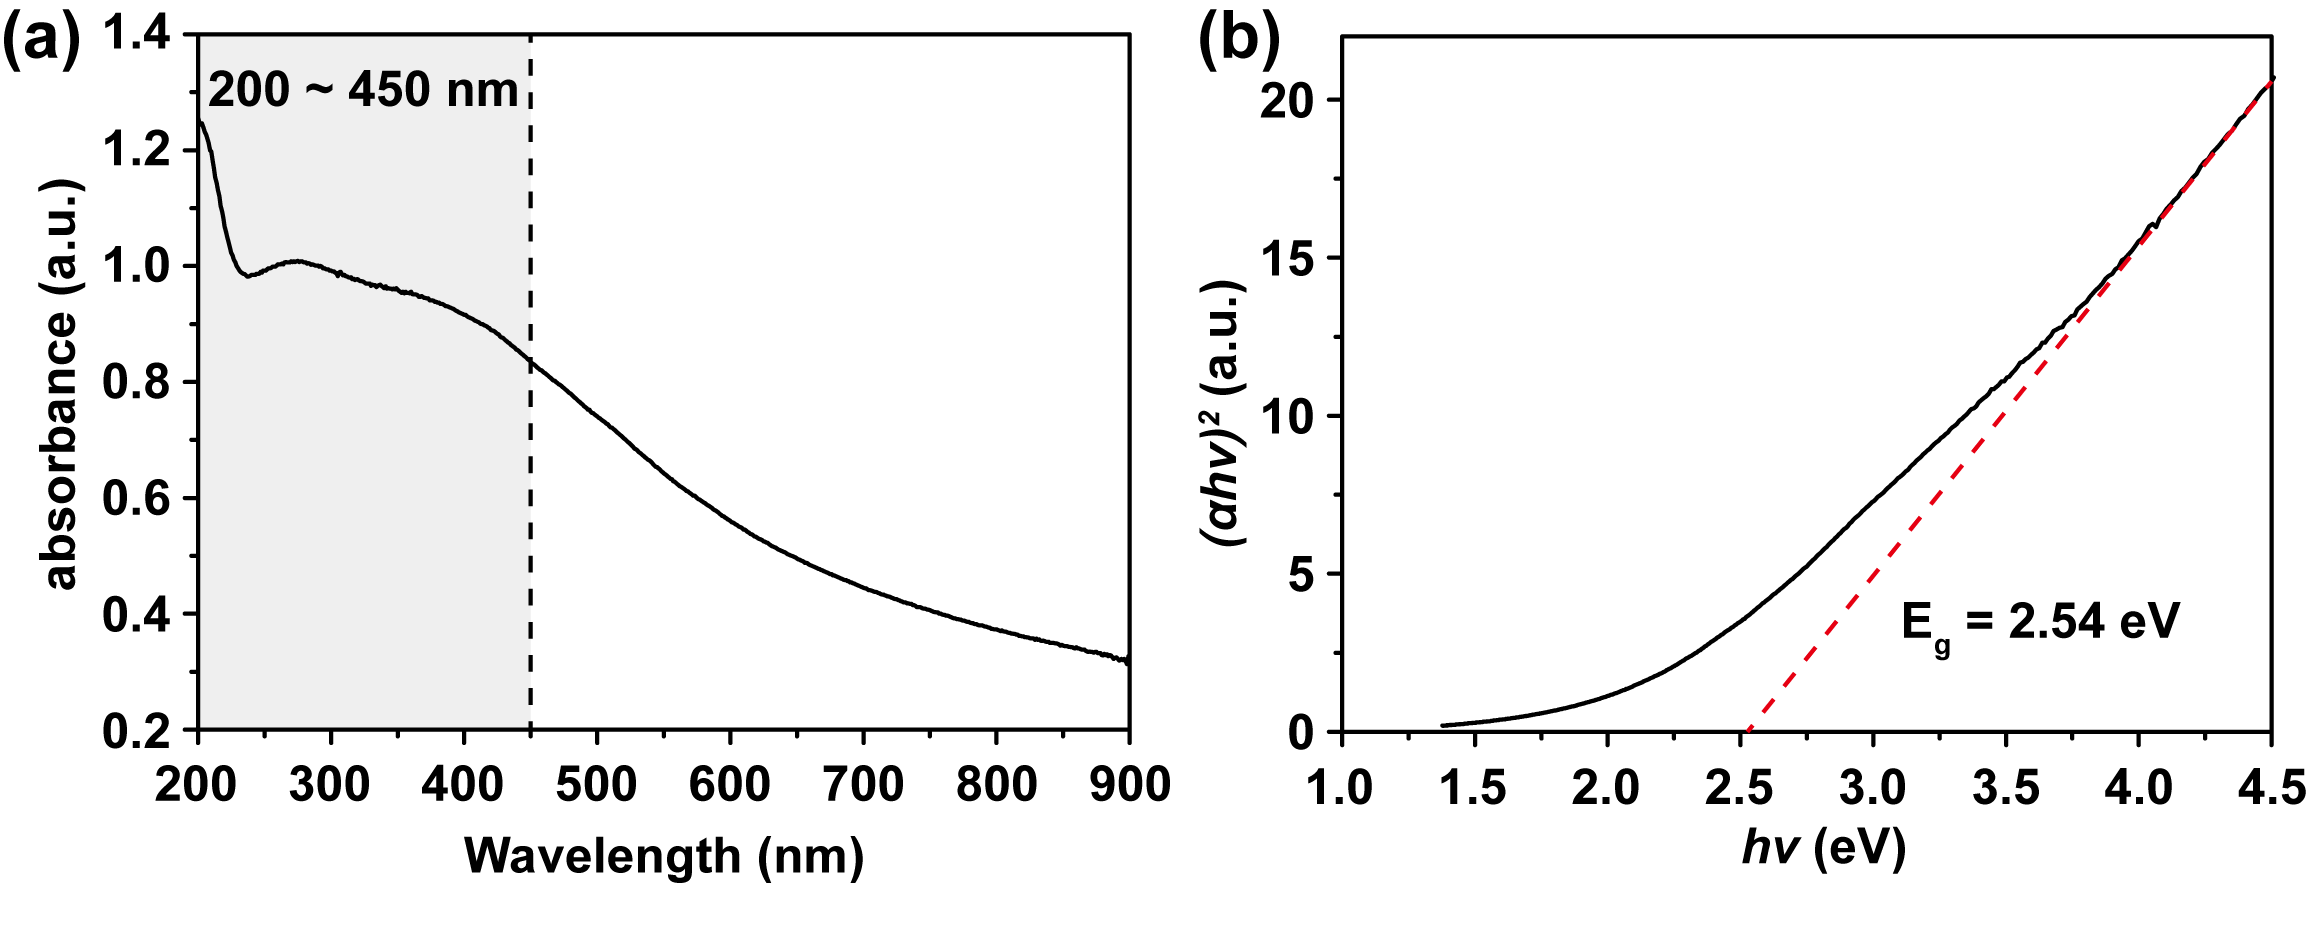


Figure S2. (a) The UV−Vis absorption spectra of R-Mn3O4 NPs and (b) the corresponding plot of (*αhν*)2 versus *hν*.

Due to the direct optical band gap of the R-Mn3O4 NPs, *Eg* was calculated by drawing a graph between (*αhυ*)2 versus *hυ* (Figure S2(b)). A straight line can be seen in the field of higher energies in the graph. The relationship between absorption coefficient (*α*) and *hυ* is given by the optical absorption equation6:

(5)

where *A* is constant; for indirect permissible transition *n* = 2 and for direct permissible transition *n* = 1/2. The *Eg* can be evaluated by drawing a straight line from (*αhυ*)2 versus *hυ* graph. The *Eg* of the R-Mn3O4 NPs was calculated to be 2.54 eV.


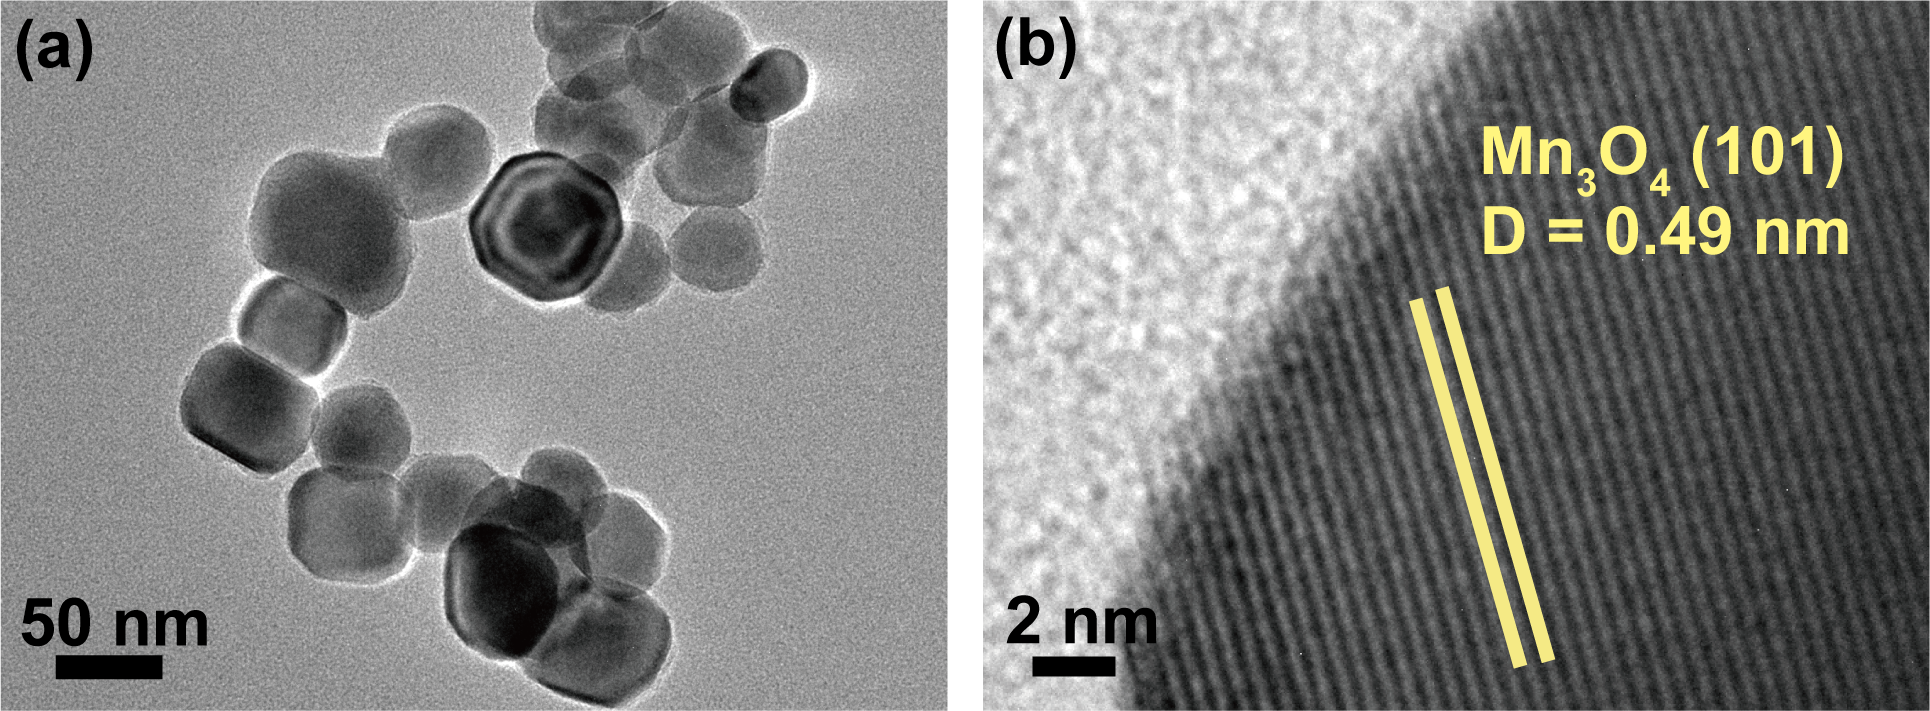


Figure S3. (a) The TEM image of R-Mn3O4 NPs and (b) the HRTEM corresponding to (a).

Figure S3(a) shows that the average diameter of R-Mn3O4 NPs is about 50 nm, and the larger version in Figure S3(b) displays a uniform lattice spacing of 0.49 nm, which is consistent with the (101) plane of tetragonal Mn3O4.


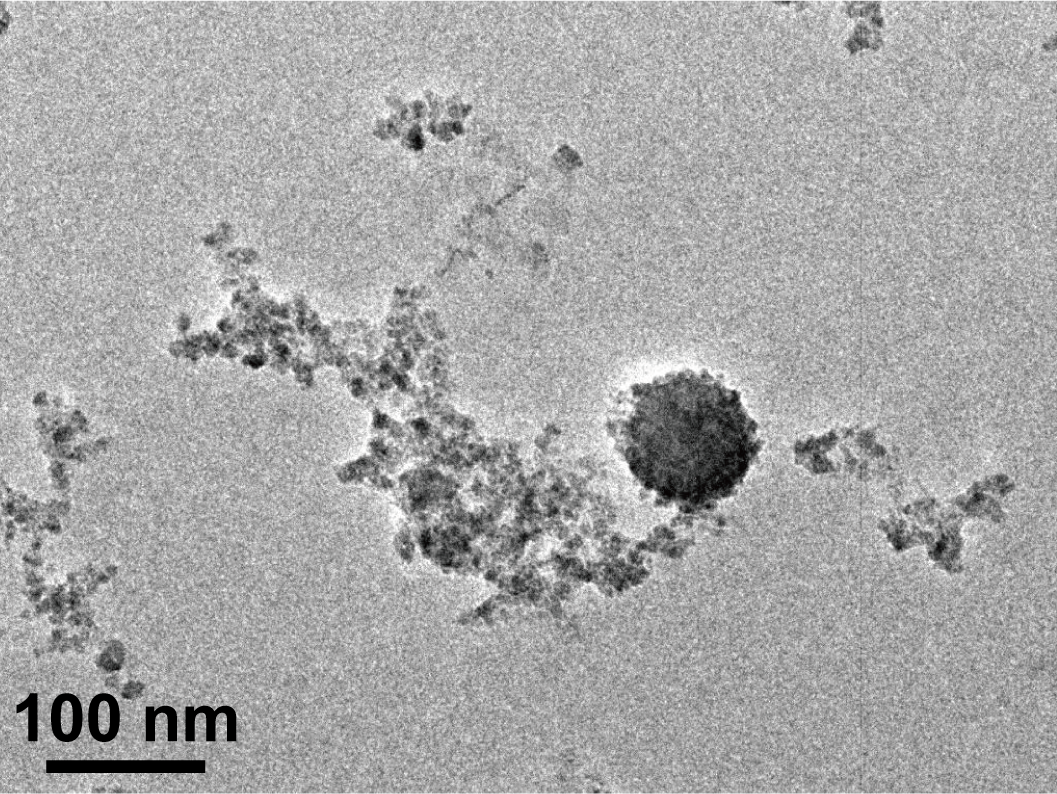


Figure S4. The TEM image of educts broken from R-Mn3O4 NPs by 532 nm pulsed laser irradiation.


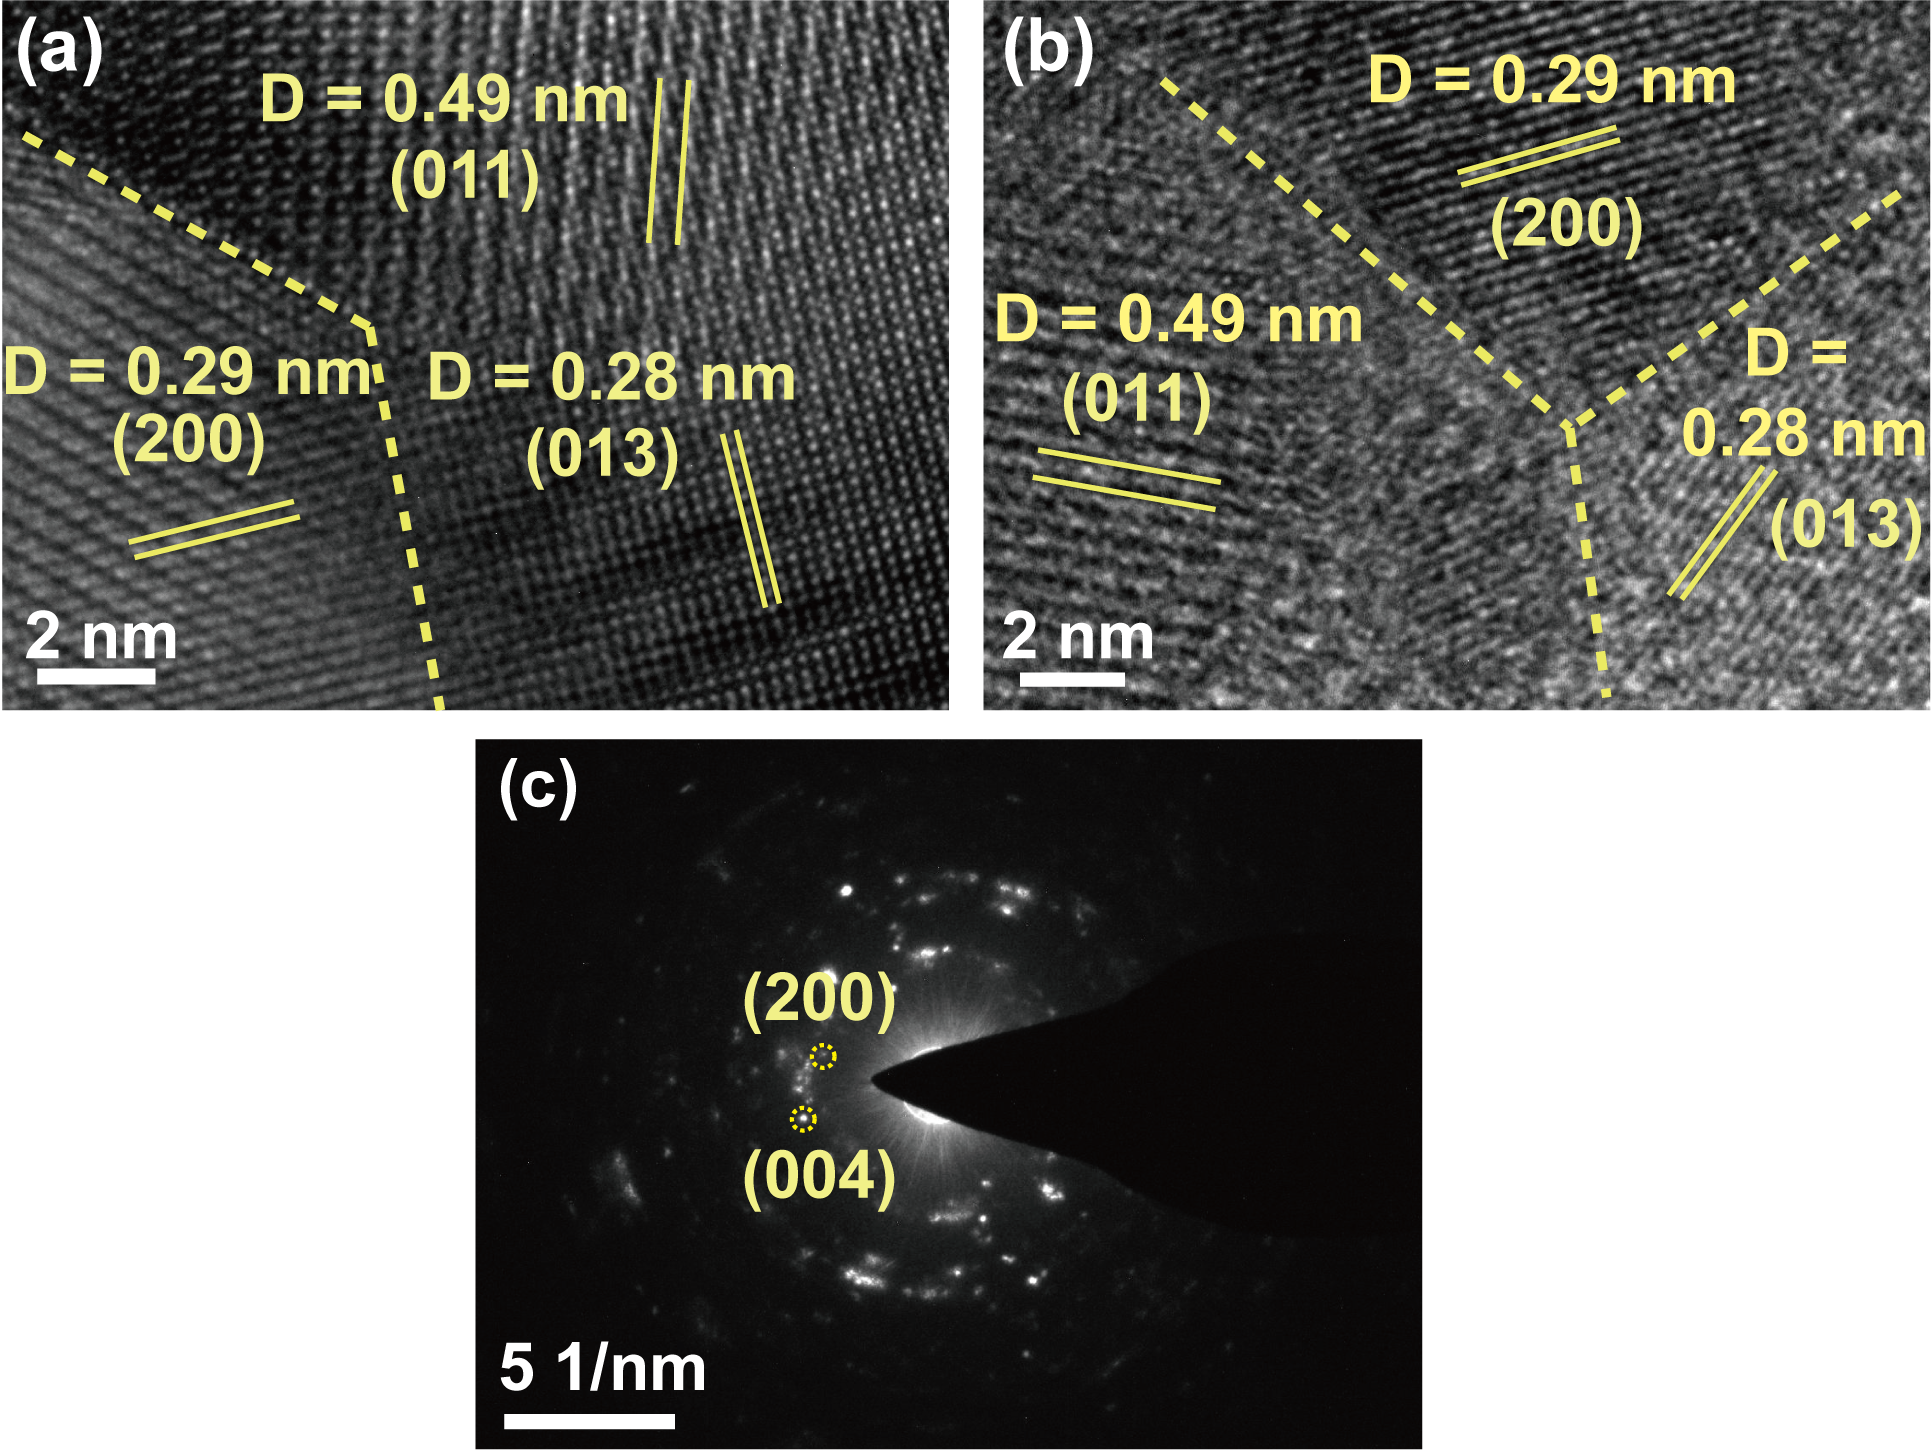


Figure S5. (a-b) Laser induced distinct grain boundary regions of L-Mn3O4 NPs. (c) Selected area electron diffraction image of L-Mn3O4 NPs.

Figure S5(a) and Figure S5(b) are the HRTEM images of different random regions on the surface of L-Mn3O4 NPs, where many grain boundaries are randomly distributed. According to the lattice fringes of L-Mn3O4 surface and orthorhombic lattice structure theory, it is easy to understand that {200} plane is co-perpendicular to (011) (lattice spacing is 0.49 nm) and (013) (lattice spacing is 0.28 nm) planes. Likewise, {004} plane is simultaneously perpendicular to (200) (lattice spacing is 0.29 nm) and (220) (lattice spacing is 0.20 nm) planes. Combined with the characteristic peaks of L-Mn3O4 NPs in the XRD pattern (Figure 1(f)) and the corresponding selected area electron diffraction patterns (Figure S5(c)) both confirm the existence of {200} and {004} planes. It can be inferred that {200} and {004} planes are the major exposed planes of L-Mn3O4 NPs. The electron diffraction pattern of L-Mn3O4 NPs also shows a ring plot (Figure S5(c)), indicating that Mn3O4 NPs suffer from structure transformation from single crystal to polycrystalline with many GBs.


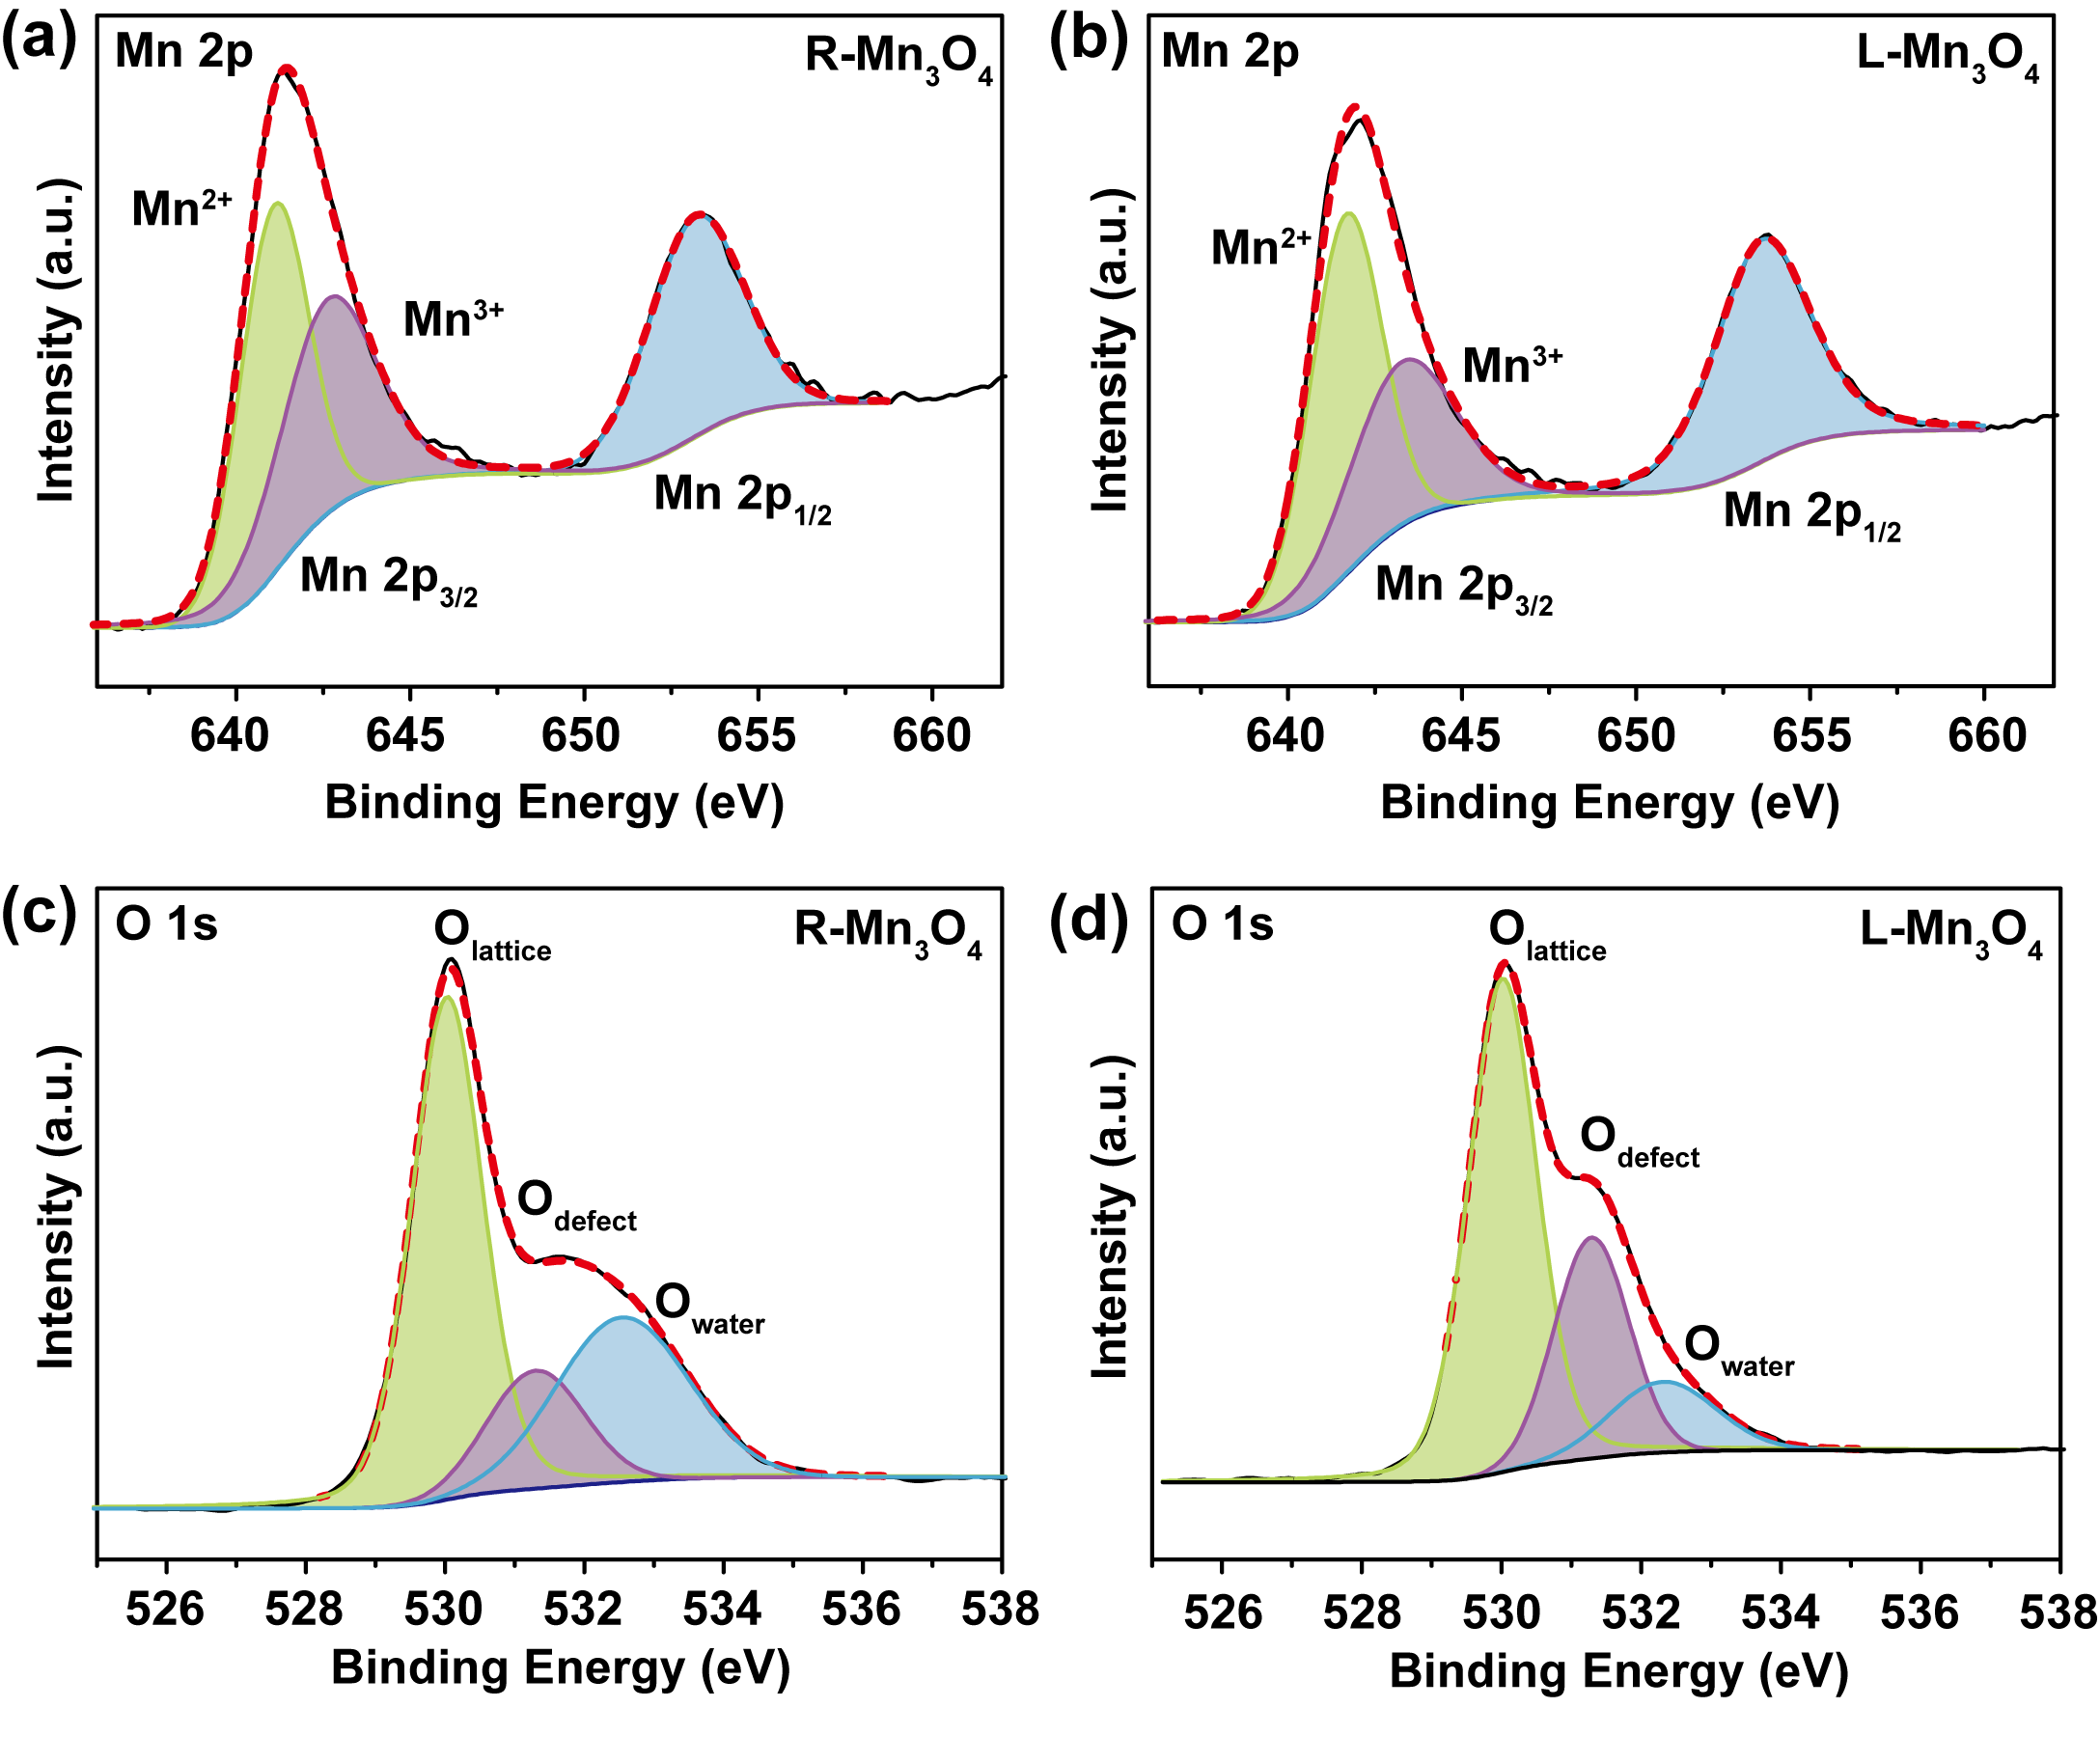


Figure S6. High-resolution Mn 2p spectrum of (a) R-Mn3O4 NPs and (b) L-Mn3O4 NPs. High-resolution O 1s spectrum of (c) R-Mn3O4 NPs and (d) L-Mn3O4 NPs.

The XPS spectra in Figure S6(a)–S6(b) show two peaks, corresponding to Mn 2p2/3 and Mn 2p1/2 species, respectively. For the peak of Mn 2p2/3, it can split into two peaks which are attributed to Mn3+ ions (642.8–643.1 eV) and Mn2+ ions (641.2–641.5 eV), respectively7. In quantitative analysis, the peak area ratio of Mn2+/Mn3+ for L-Mn3O4 is about 1.4:1, which is higher than 1.1:1 for L-Mn3O4. The XPS spectra for O1s of R-Mn3O4 and L-Mn3O4 (Figure S6(c)–S6(d)) both can be divided into three peaks located at 530 eV, 531.3 eV and 532.6 eV which are attributed to lattice oxygen in Mn3O4 (Olattice), material defects (Odefects) and water molecular adsorbed on the surface of Mn3O4 (Owater), respectively8. Comparing the peak area of Olattice and Odefects, it can be found that the ratio of Odefects/ Olattice in L-Mn3O4 is also higher than that in R-Mn3O4. The analysis above show that laser irradiation increases the content of defects in the Mn3O4 system, which is consistent with the generation of GBs.


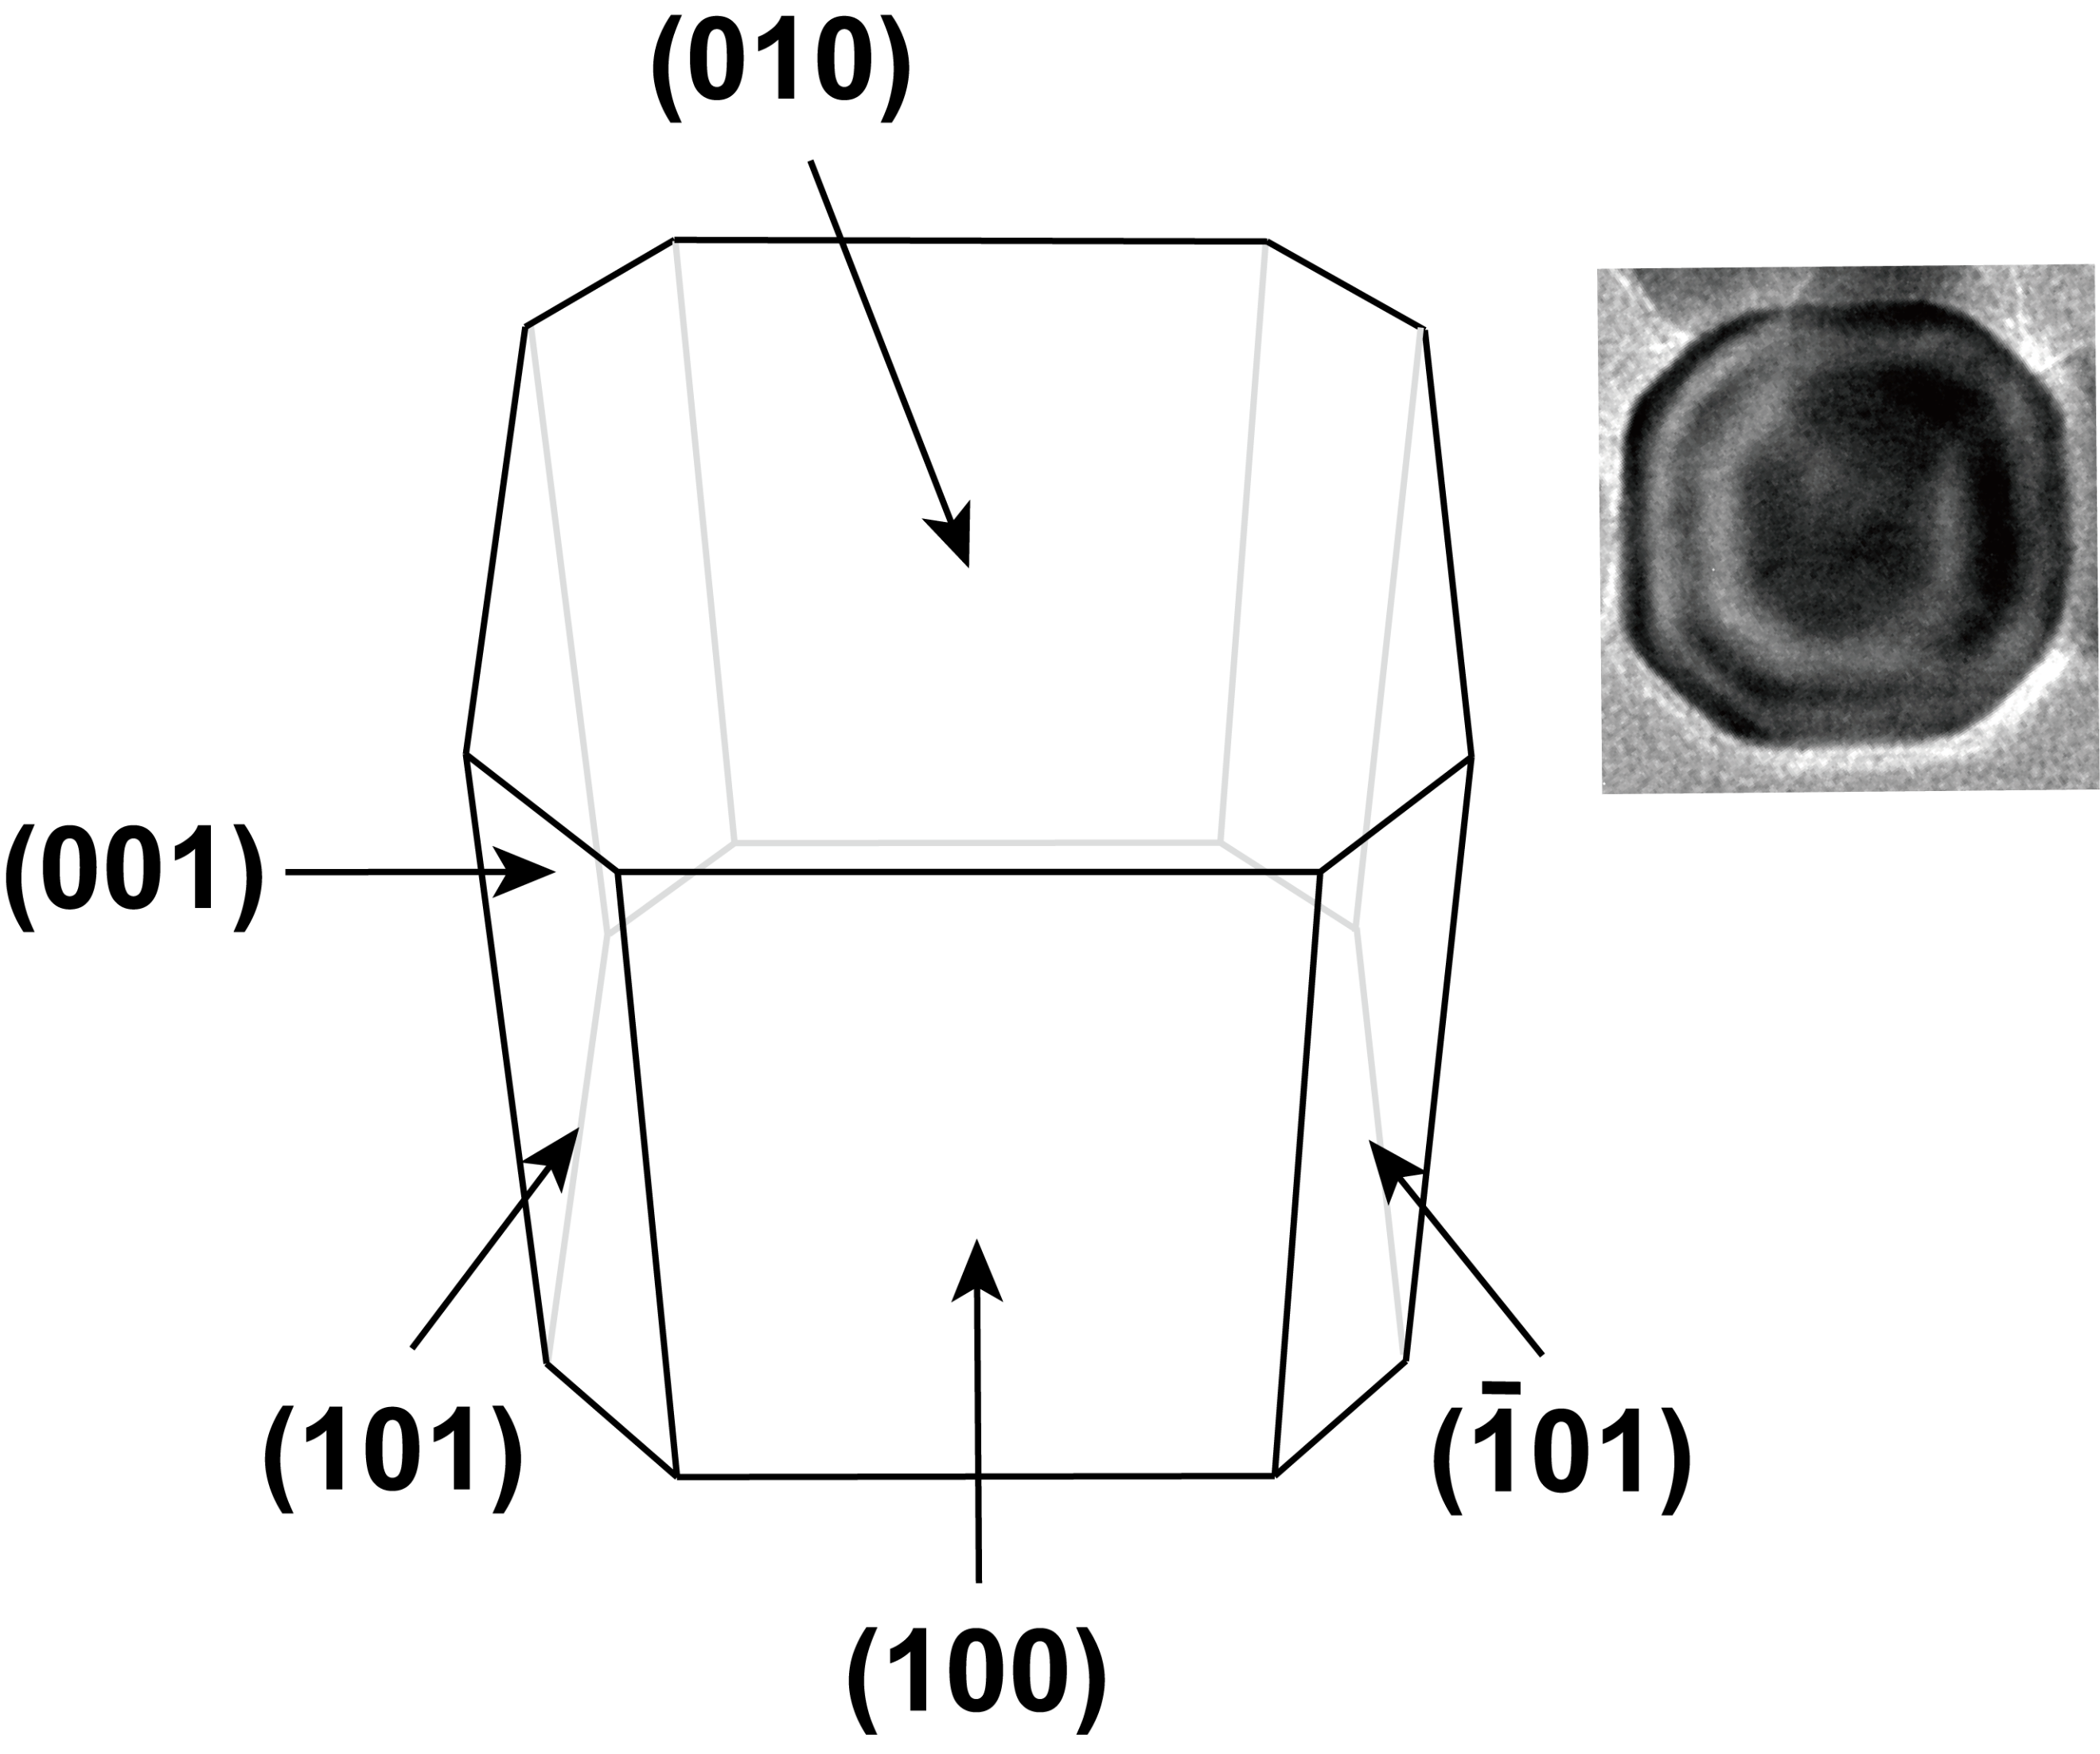


Figure S7. Schematic illustration of the shape for R-Mn3O4 NPs in 3D reconstruction


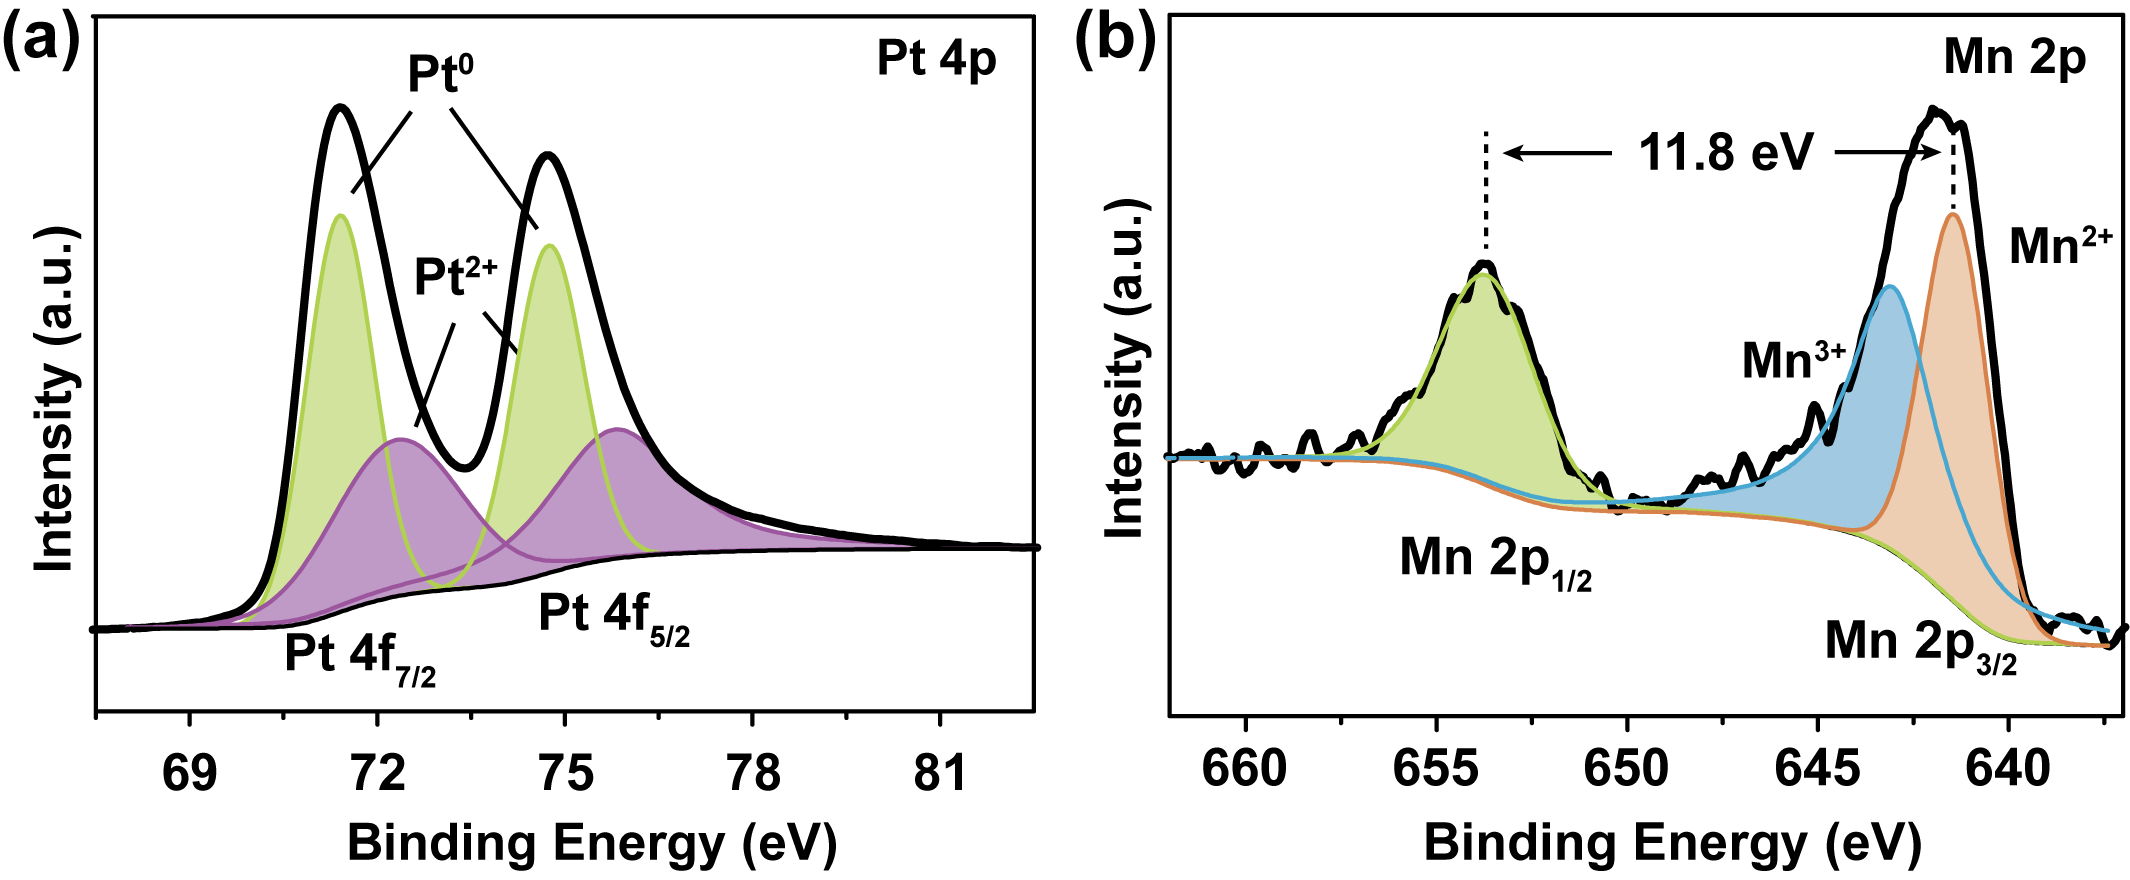


Figure S8. Compositional analysis of Pt Cs. (a) High-resolution Pt 4f spectrum of Pt Cs and (b) High-resolution Mn 2p spectrum of Pt Cs.

In Figure S8(a), XPS spectrum shows two peaks for Pt in Pt Cs. Both can be divided into two peaks: a stronger one and a weaker one. The stronger two peaks located at 71.3 eV and 74.6 eV are attributed to zero-valent Pt 4f7/2 and Pt 4f5/2, respectively. While the weaker two peaks at 72.6 eV and 75.9 eV are corresponding to the divalent Pt 4f7/2 and Pt 4f5/2, which may be derived from partial oxidation on particle surface9. In Figure S8(b), the binding energy values of 653.8 eV and 642.0 eV are ascribed to the Mn 2p3/2 and Mn 2p1/2 spin-orbit peaks of Mn3O4, and the energy separation between the two spin-orbit peaks is 11.8 eV7, 10. This further confirms the existence of residual minor manganese oxide.


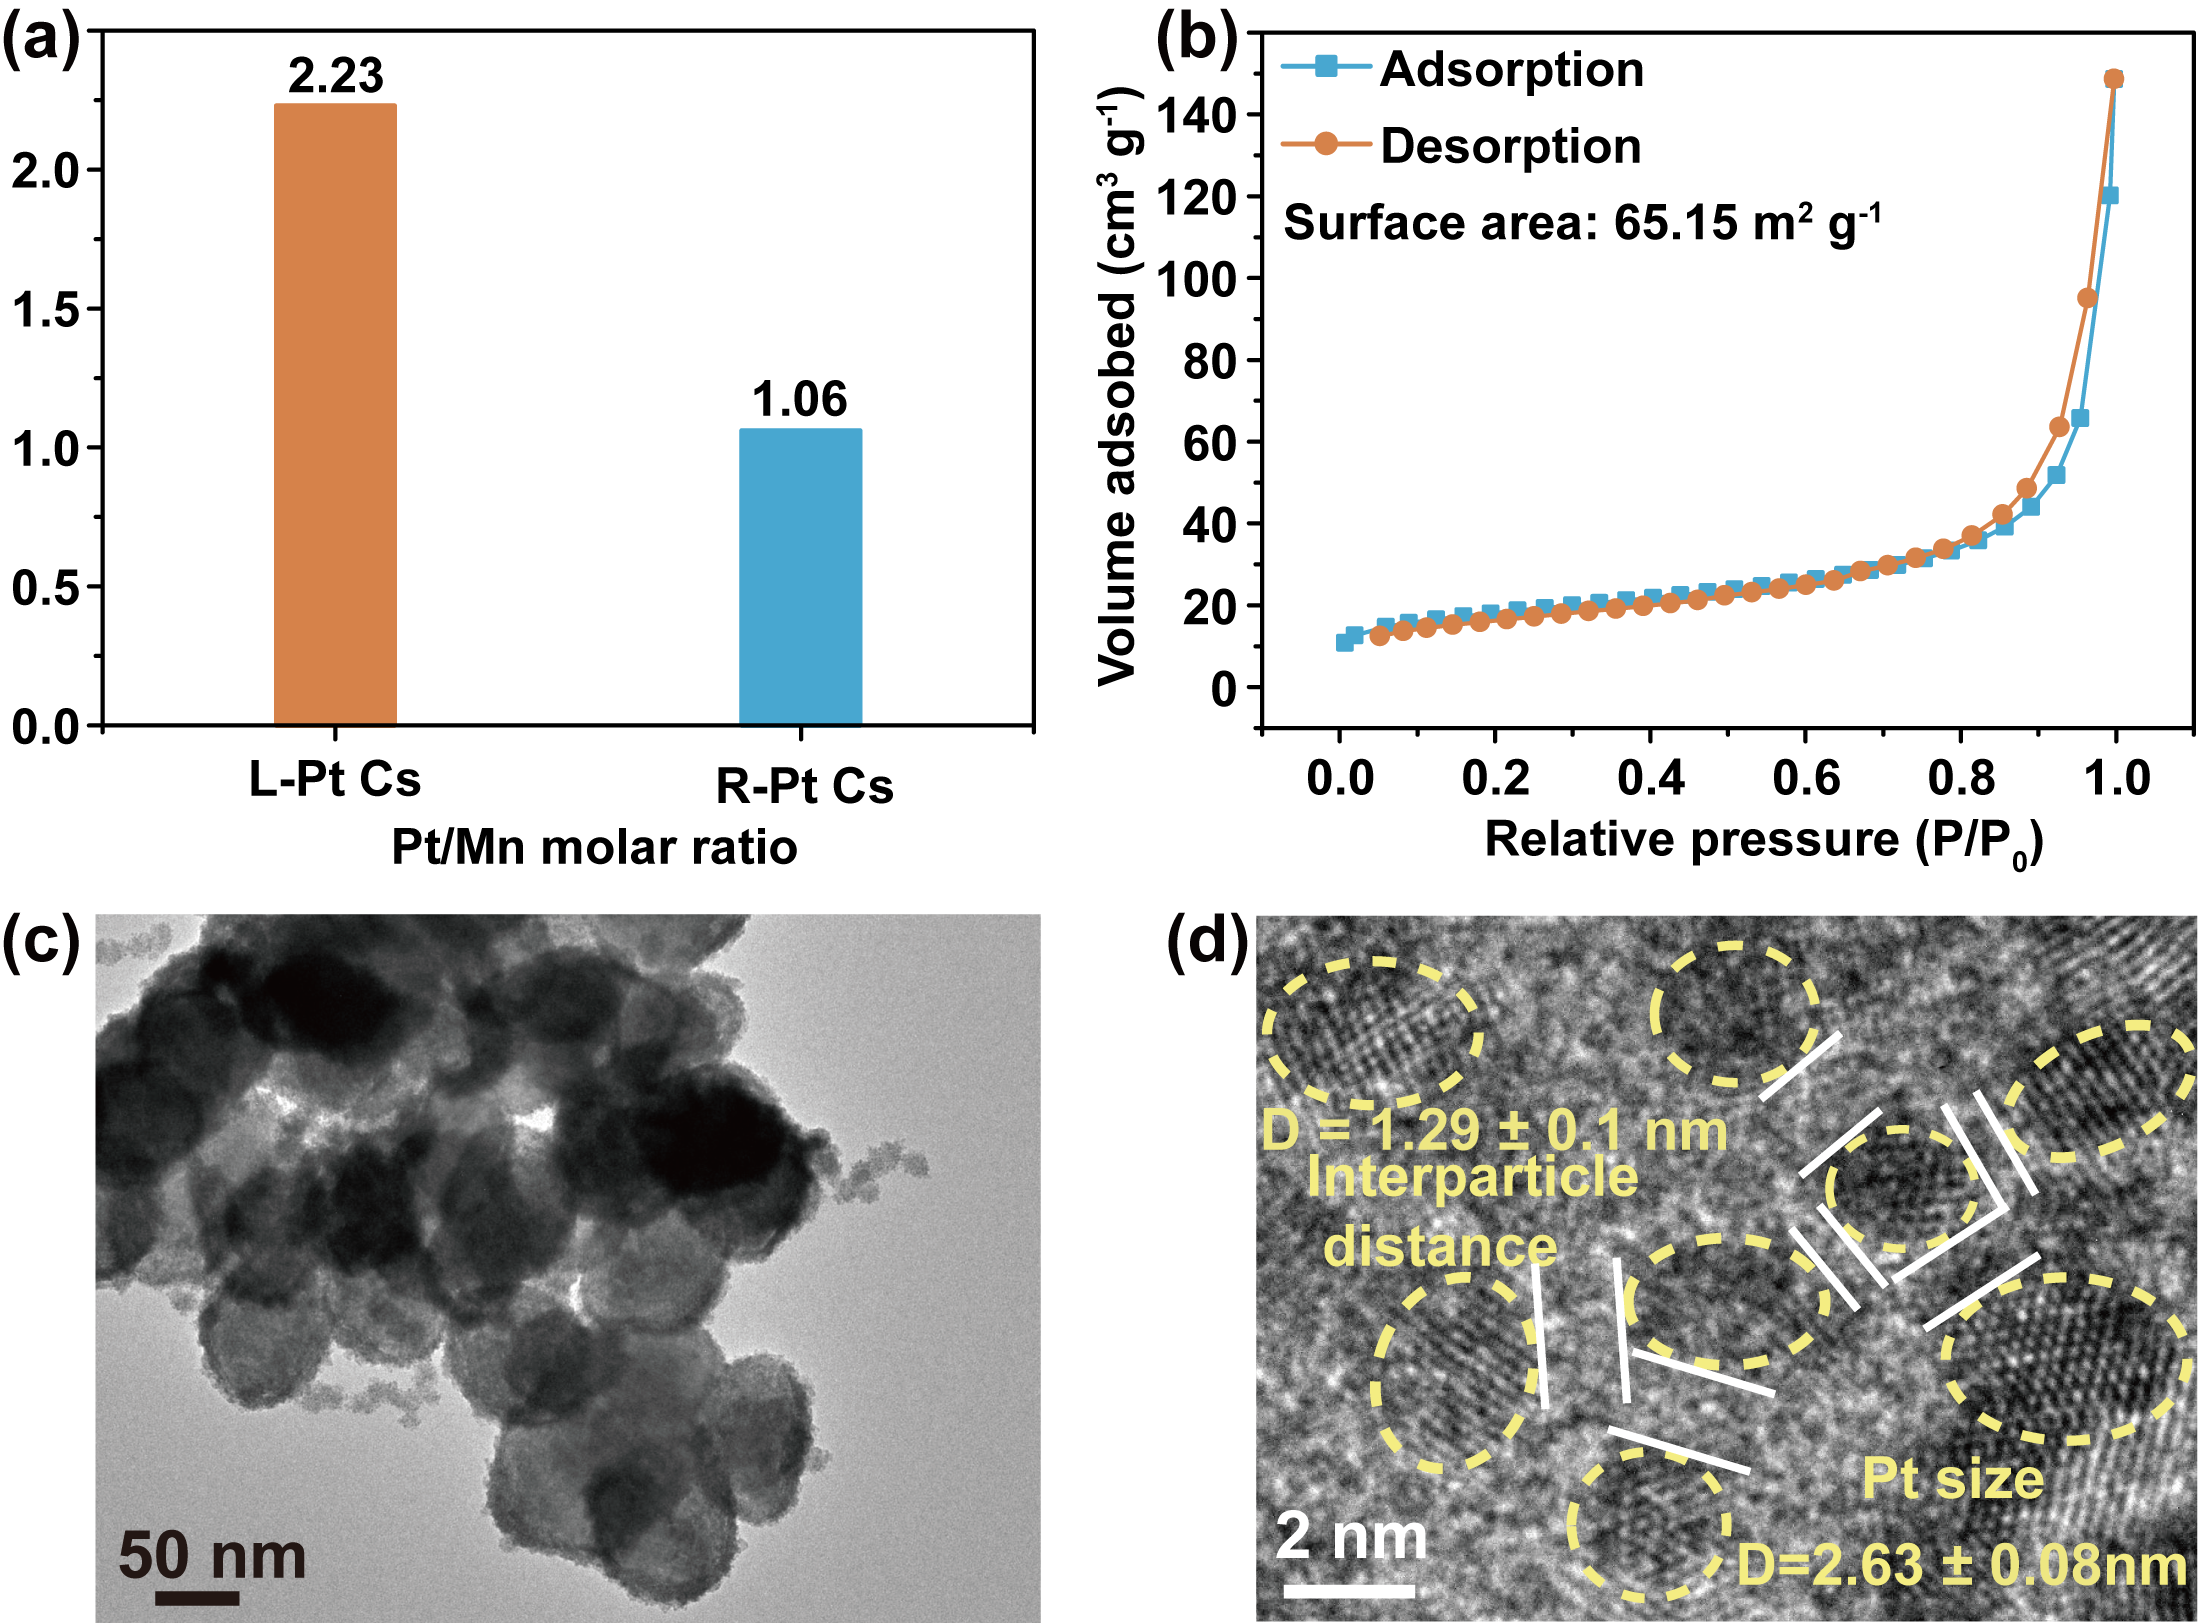


Figure S9. (a) Pt/Mn molar ratio of Pt Cs and R-Pt Cs. Morphological and structural analysis of R-Pt Cs: (b) N2 adsorption-desorption isotherms, (c) The TEM image and (d) the corresponding HRTEM.


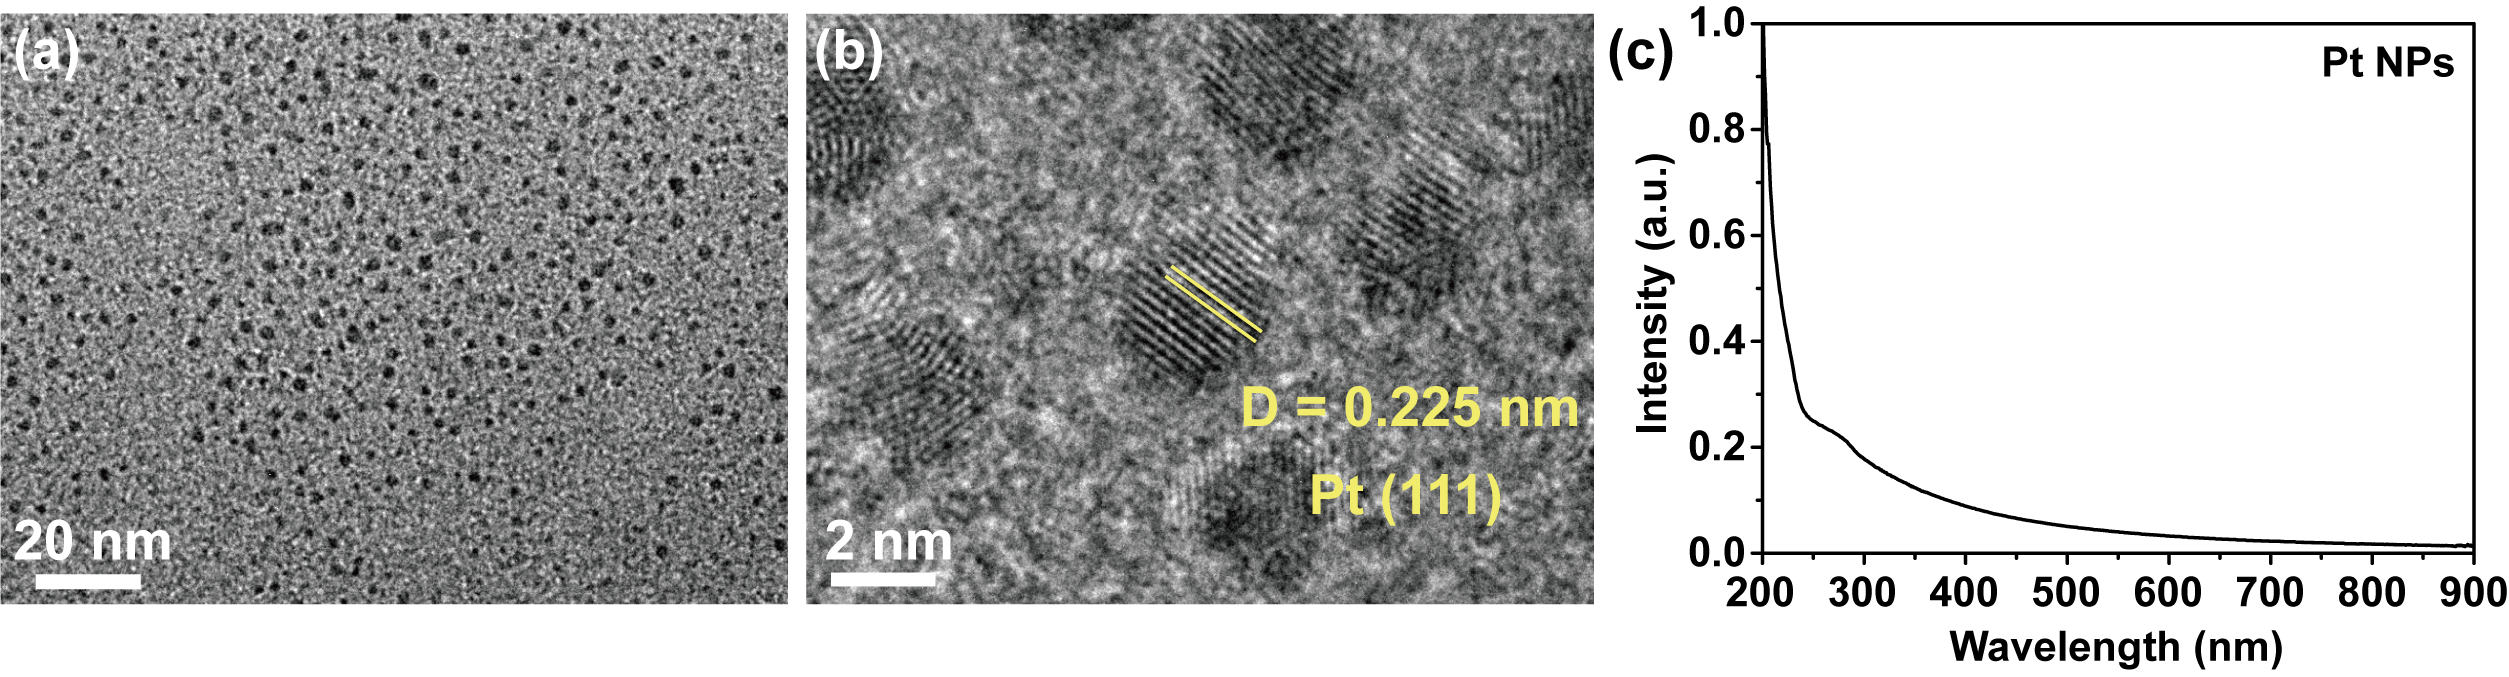


Figure S10. (a) The TEM image of Pt NPs and (b) the HRTEM corresponding to (a). (c) The UV–Vis absorption spectrum of Pt NPs.


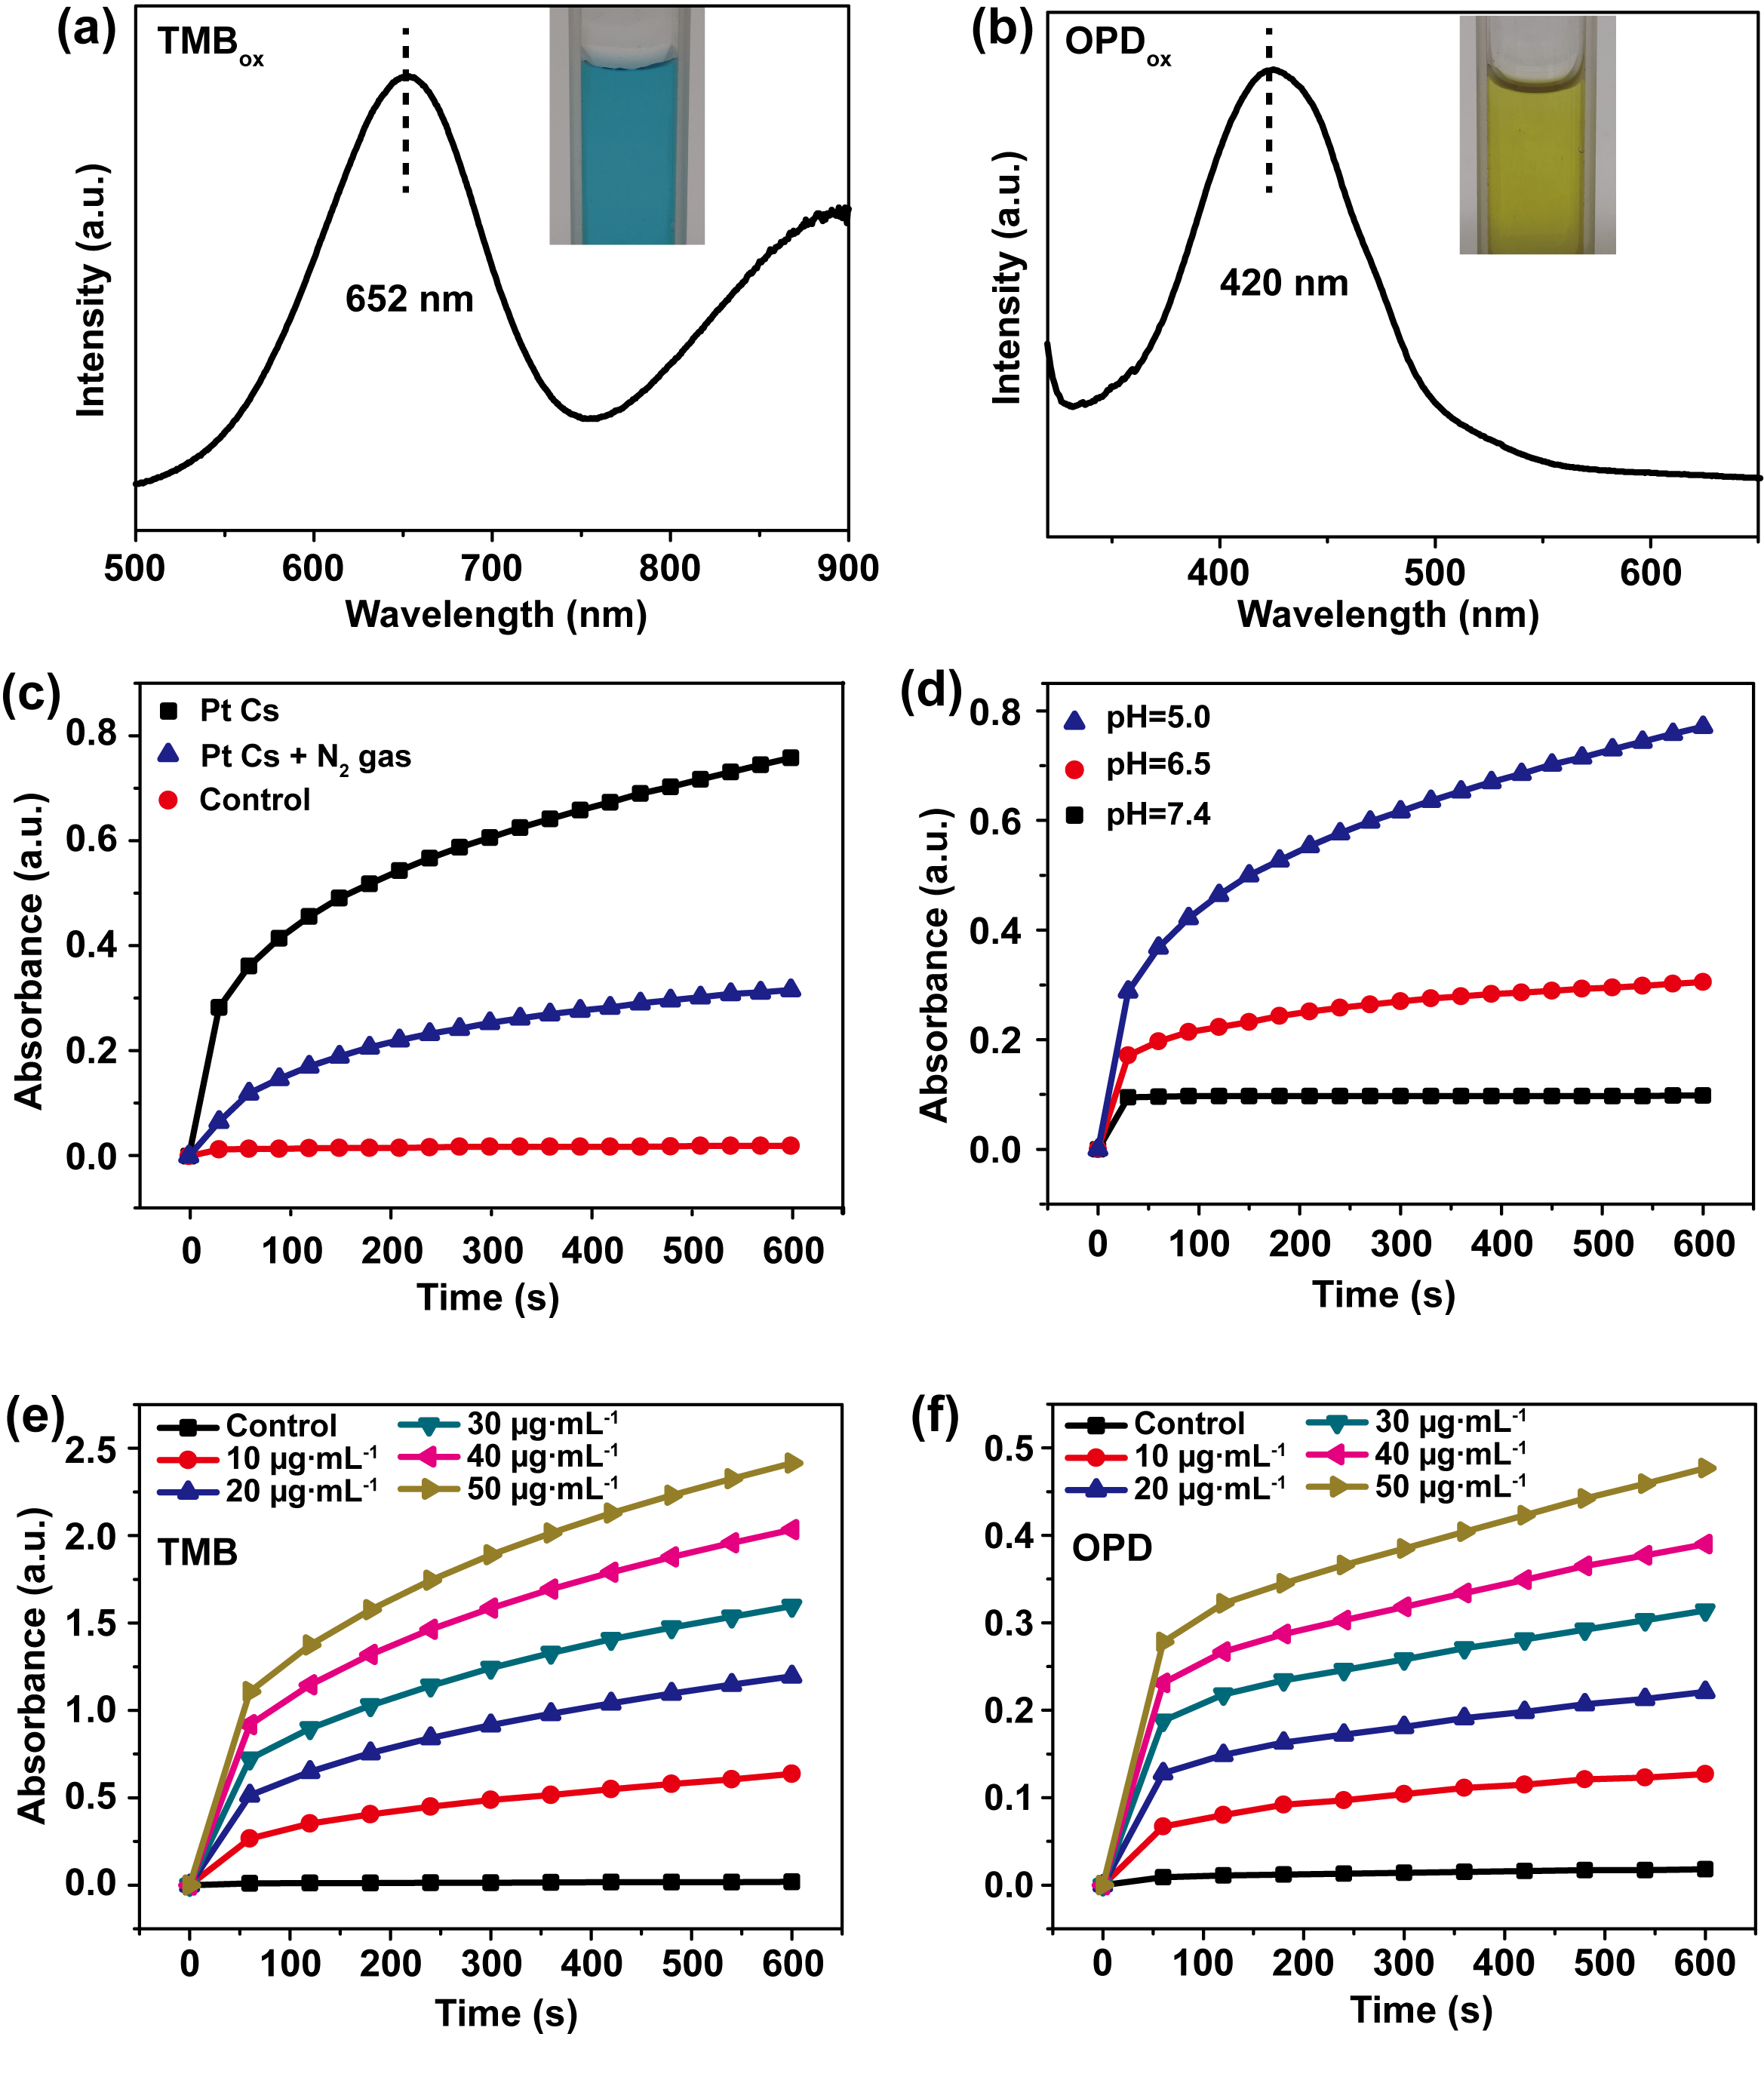


Figure S11. The OXD mimic activity of Pt Cs. UV–vis absorption spectra of the catalyzed oxidation of different substrates: (a) TMB and (b) OPD. (c) Time-dependent absorbance changes at 652 nm of TMBox in the presence of Pt Cs blowing with N2 gas (mimicking hypoxic condition) or not. (d) Time-dependent absorbance changes at 652 nm of TMB with different pH (5.0, 6.5 and 7.4). (e) Time-dependent absorbance changes at 652 nm of TMB in the presence of Pt Cs of different concentration (10, 20, 30, 40 and 50 µg·mL−1). (f) Time-dependent absorbance changes at 420 nm of OPD in the presence of Pt Cs of different concentration (10, 20, 30, 40 and 50 µg·mL−1).

To investigate the OXD mimic activities of Pt Cs, we monitored the ROS level changes in the system by measuring the characteristic absorbance of the oxidized substrates. As illustrated in Figure S11(a)–S11(b), in the presence of Pt Cs, the buffer system containing TMB turned from colorless to blue solution. This indicates the emergence of TMBox which has a major absorbance peak at 652 nm. Similarly, OPD can also be oxidized by Pt Cs to generate yellow OPDox with a characteristic peak at 420 nm.10 Pt Cs can effectively promote the oxidation of TMB in normoxic water. Whereas under hypoxia condition, the TMBox characteristic peak is obviously weakened (Figure S11(c)). So, Pt Cs can catalyze the reduction of O2 to form O2•− species and promote the oxidation of TMB as a substrate. In addition, we also investigated the OXD mimic activity of Pt Cs at different pH values (Figure S11(d)). In the buffers with pH values of 5.0, 6.5 and 7.4, the absorbance of the oxidation substrate reached 0.771, 0.305 and 0.098 within 10 min, respectively. This verified the acidic environment dependence of Pt Cs as an oxidase mimic. Figure S11(e)–S11(f) shows that the characteristic absorbance of TMBox and OPDox increase with the increase of Pt Cs concentration, indicating the positive correlation between OXD mimic activity and Pt Cs concentration.


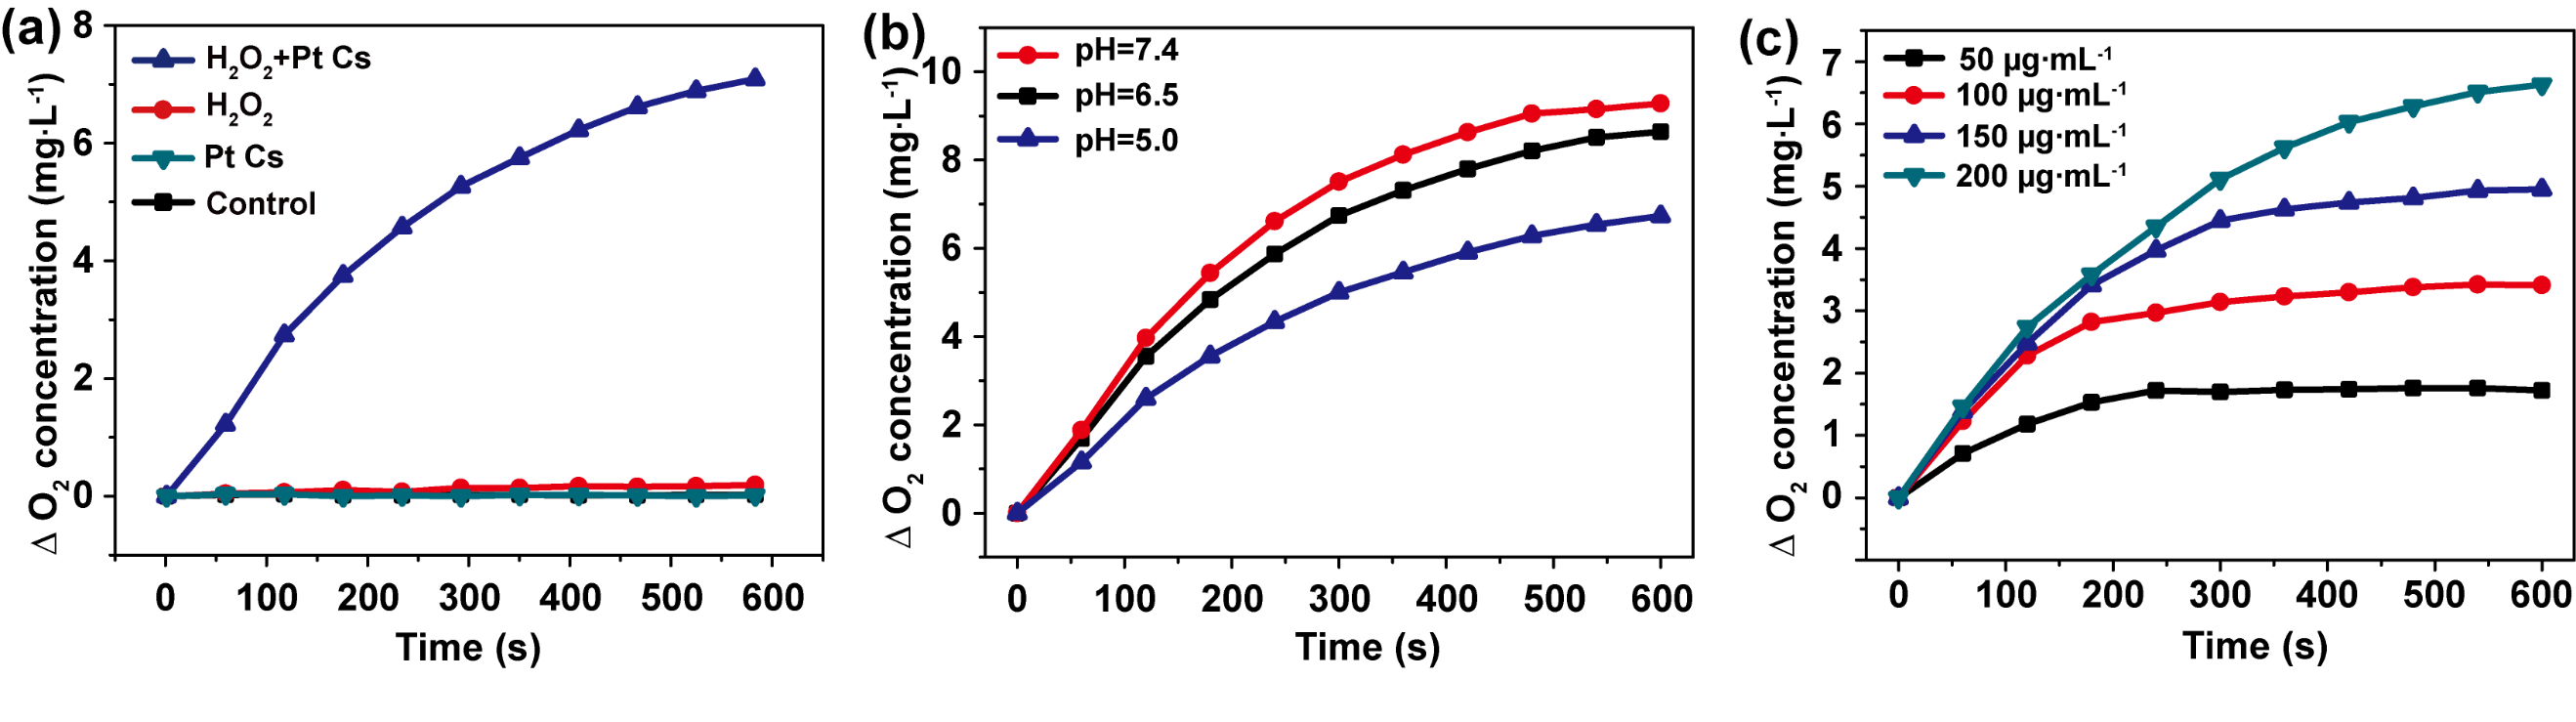


Figure S12. (a) O2 generation of various groups in 10 min. (b) Time-dependent Oxygen concentration change in H2O2 solution with Pt Cs added under different pH values (5.0, 6.5 and 7.4). (c) Time-dependent oxygen concentration changes in H2O2 solution with different concentration of Pt Cs added (50, 100, 150 and 200 µg·mL−1).

Figure S12(a) shows the increase of dissolved oxygen were detected in the presence of H2O2 and Pt Cs by dissolved oxygen meter, while the dissolved oxygen concentration does not change significantly in the presence of H2O2 or Pt Cs only. The results showed that Pt Cs has CAT mimic activity. Pt Cs and H2O2 were added into buffer solutions with pH values of 5.0, 6.5 and 7.4, and the amount of O2 generated within 10 min will reach 6.73, 8.64 and 9.28 mg·L−1, respectively (Figure S12(b)). This means that Pt Cs can exhibit strong catalytic ability in acidic TME. Figure S12(c) shows that the concentration of dissolved oxygen increases with the increase of Pt Cs concentration, indicating that there is a positive correlation between CAT mimic activity and Pt Cs concentration.

Table S1. Feeding mass ratio and the corresponding molar ratio of Pt Cs.

| Samples | 1 | 2 | 3 | 4 |
| --- | --- | --- | --- | --- |
| Na2PtCl4/L-Mn3O4 Feeding mass ratio | 2:1 | 6:1 | 8:1 | 10:1 |
| Actual Pt/Mn molar ratio | 0.6 | 1.5 | 2.2 | 3.1 |


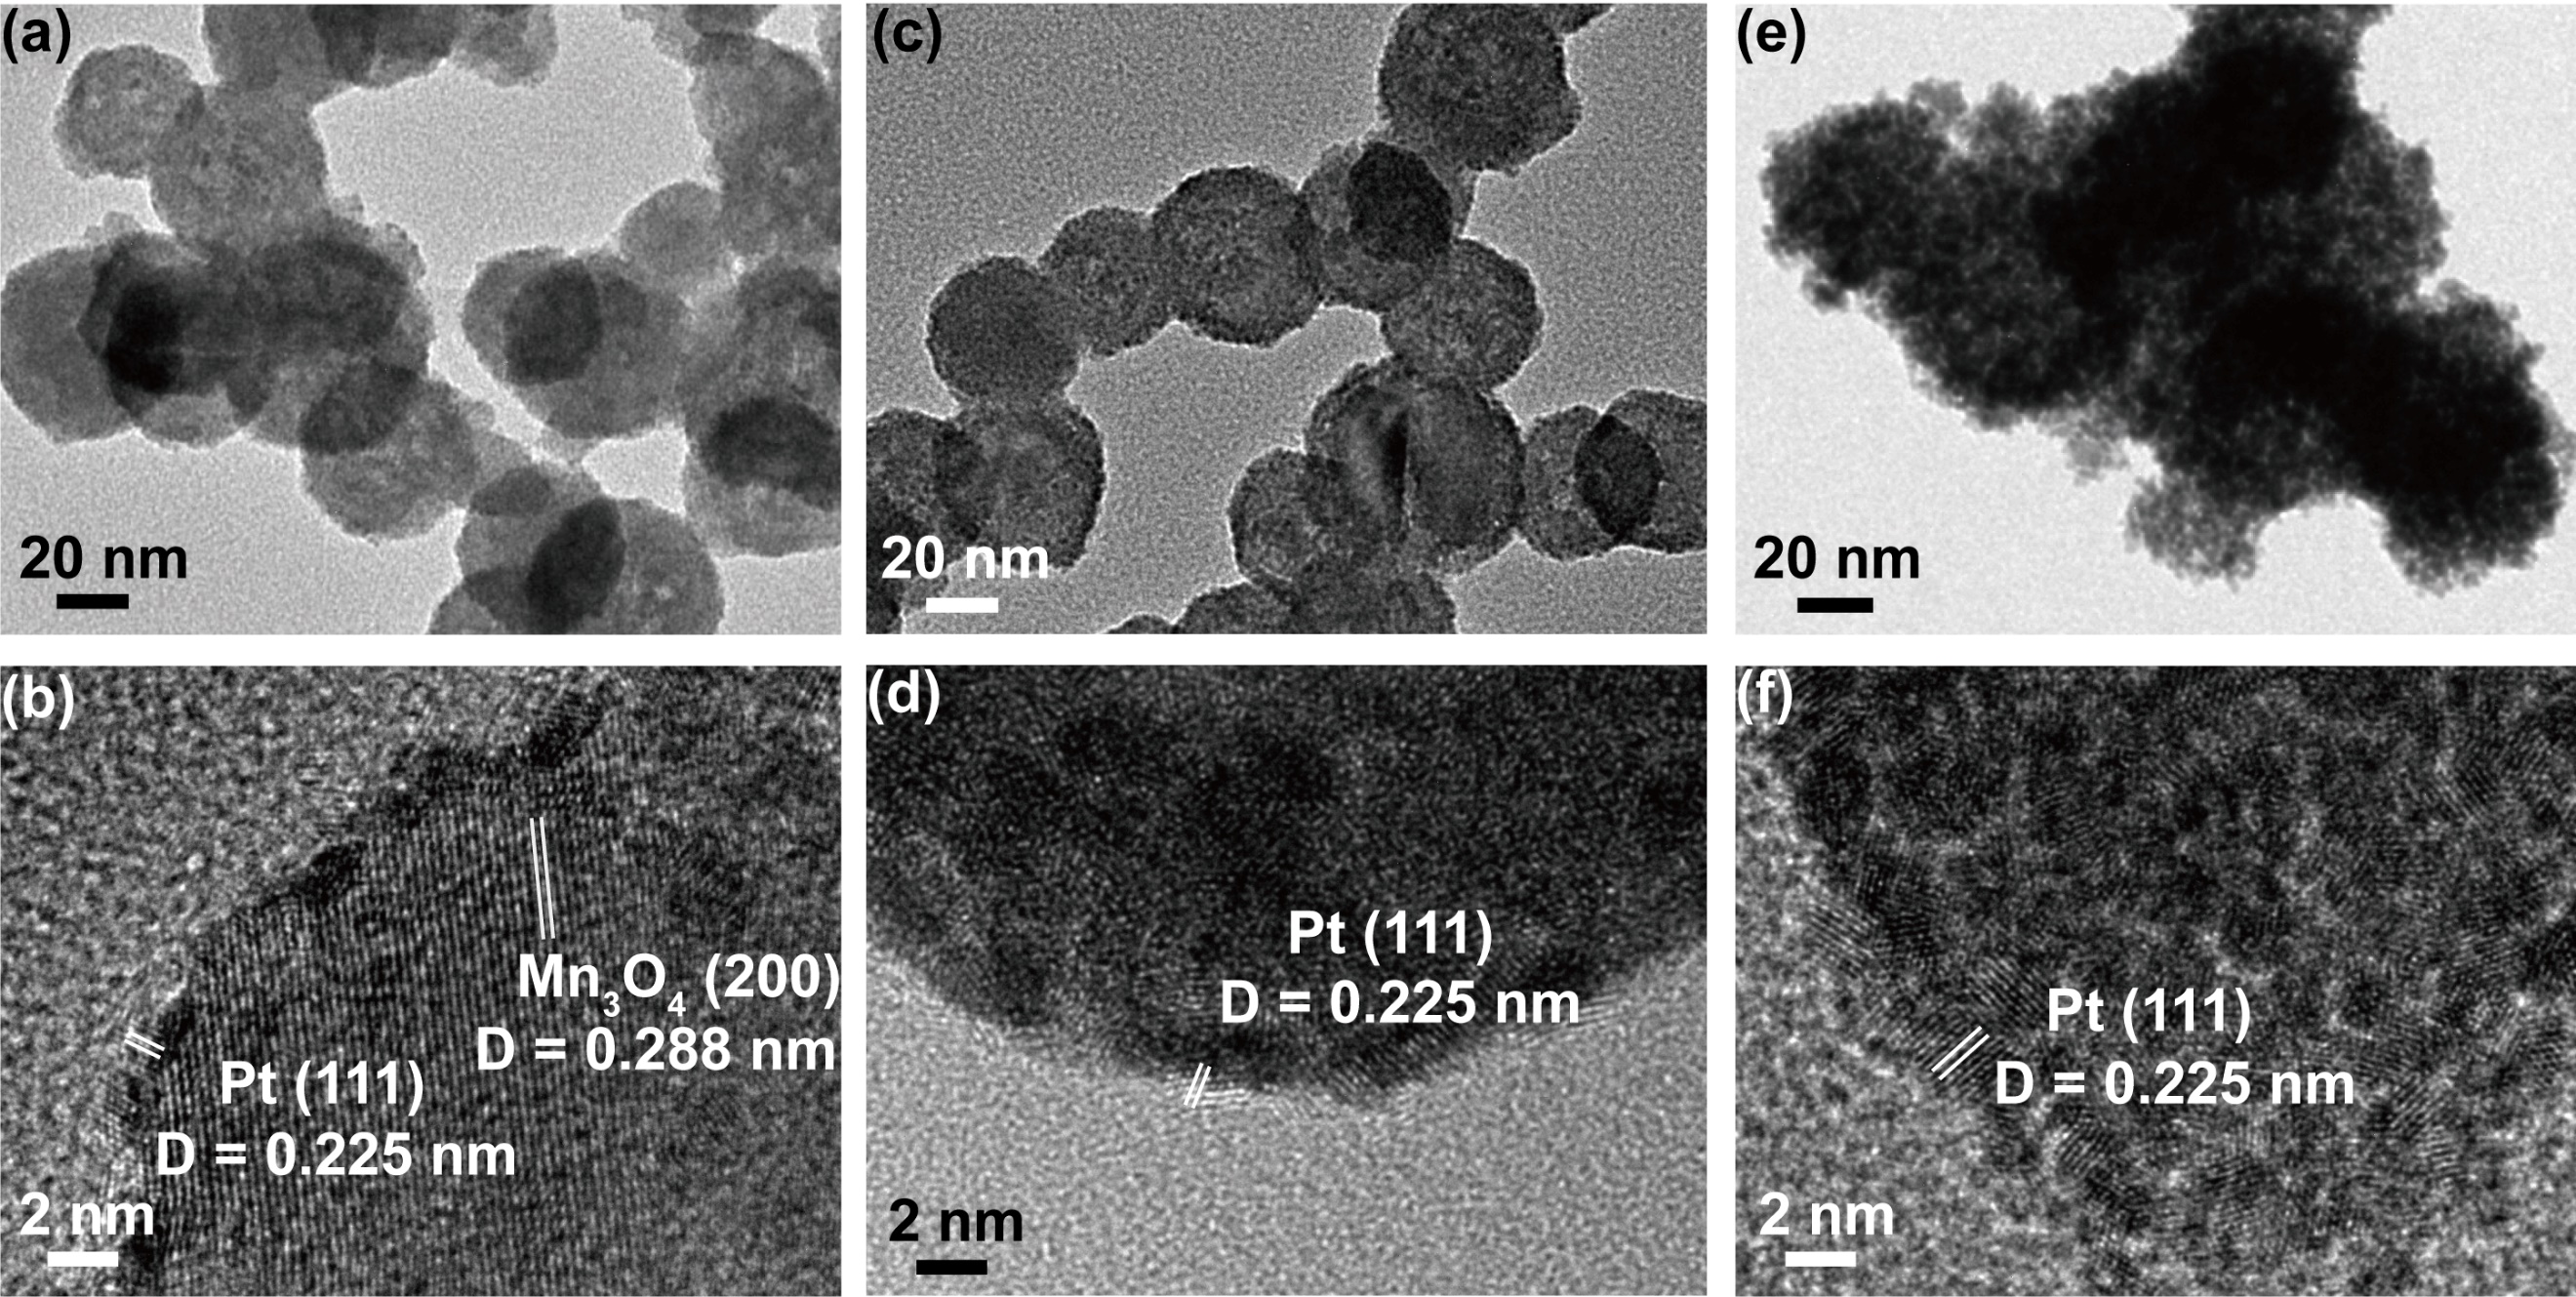


Figure S13. TEM images of Pt Cs with different Pt/Mn molar ratio: (a) 0.6, (c) 1.5 and (e) 3.1; HRTEM images of Pt Cs with different Pt/Mn molar ratio: (b) 0.6, (d) 1.5 and (f) 3.1.

Pt Cs with different Pt/Mn molar ratios were prepared by adjusting the feed ratio. When the Pt/Mn molar ratio was low (Pt/Mn = 0.6), the lattice fringes of Mn3O4 could still be seen in the TEM image (Figure S13(a)–S13(b)). As the molar ratio of Pt/Mn increases to 1.5, the deposition of ultrasmall Pt NPs on the surface of the Pt Cs gradually increases (Figure S13(c)–S13(d)). When the molar ratio of Pt/Mn reaches to 3.1 (Figure S13(e)–13(f)), the structure of Pt Cs tends to be untenable.


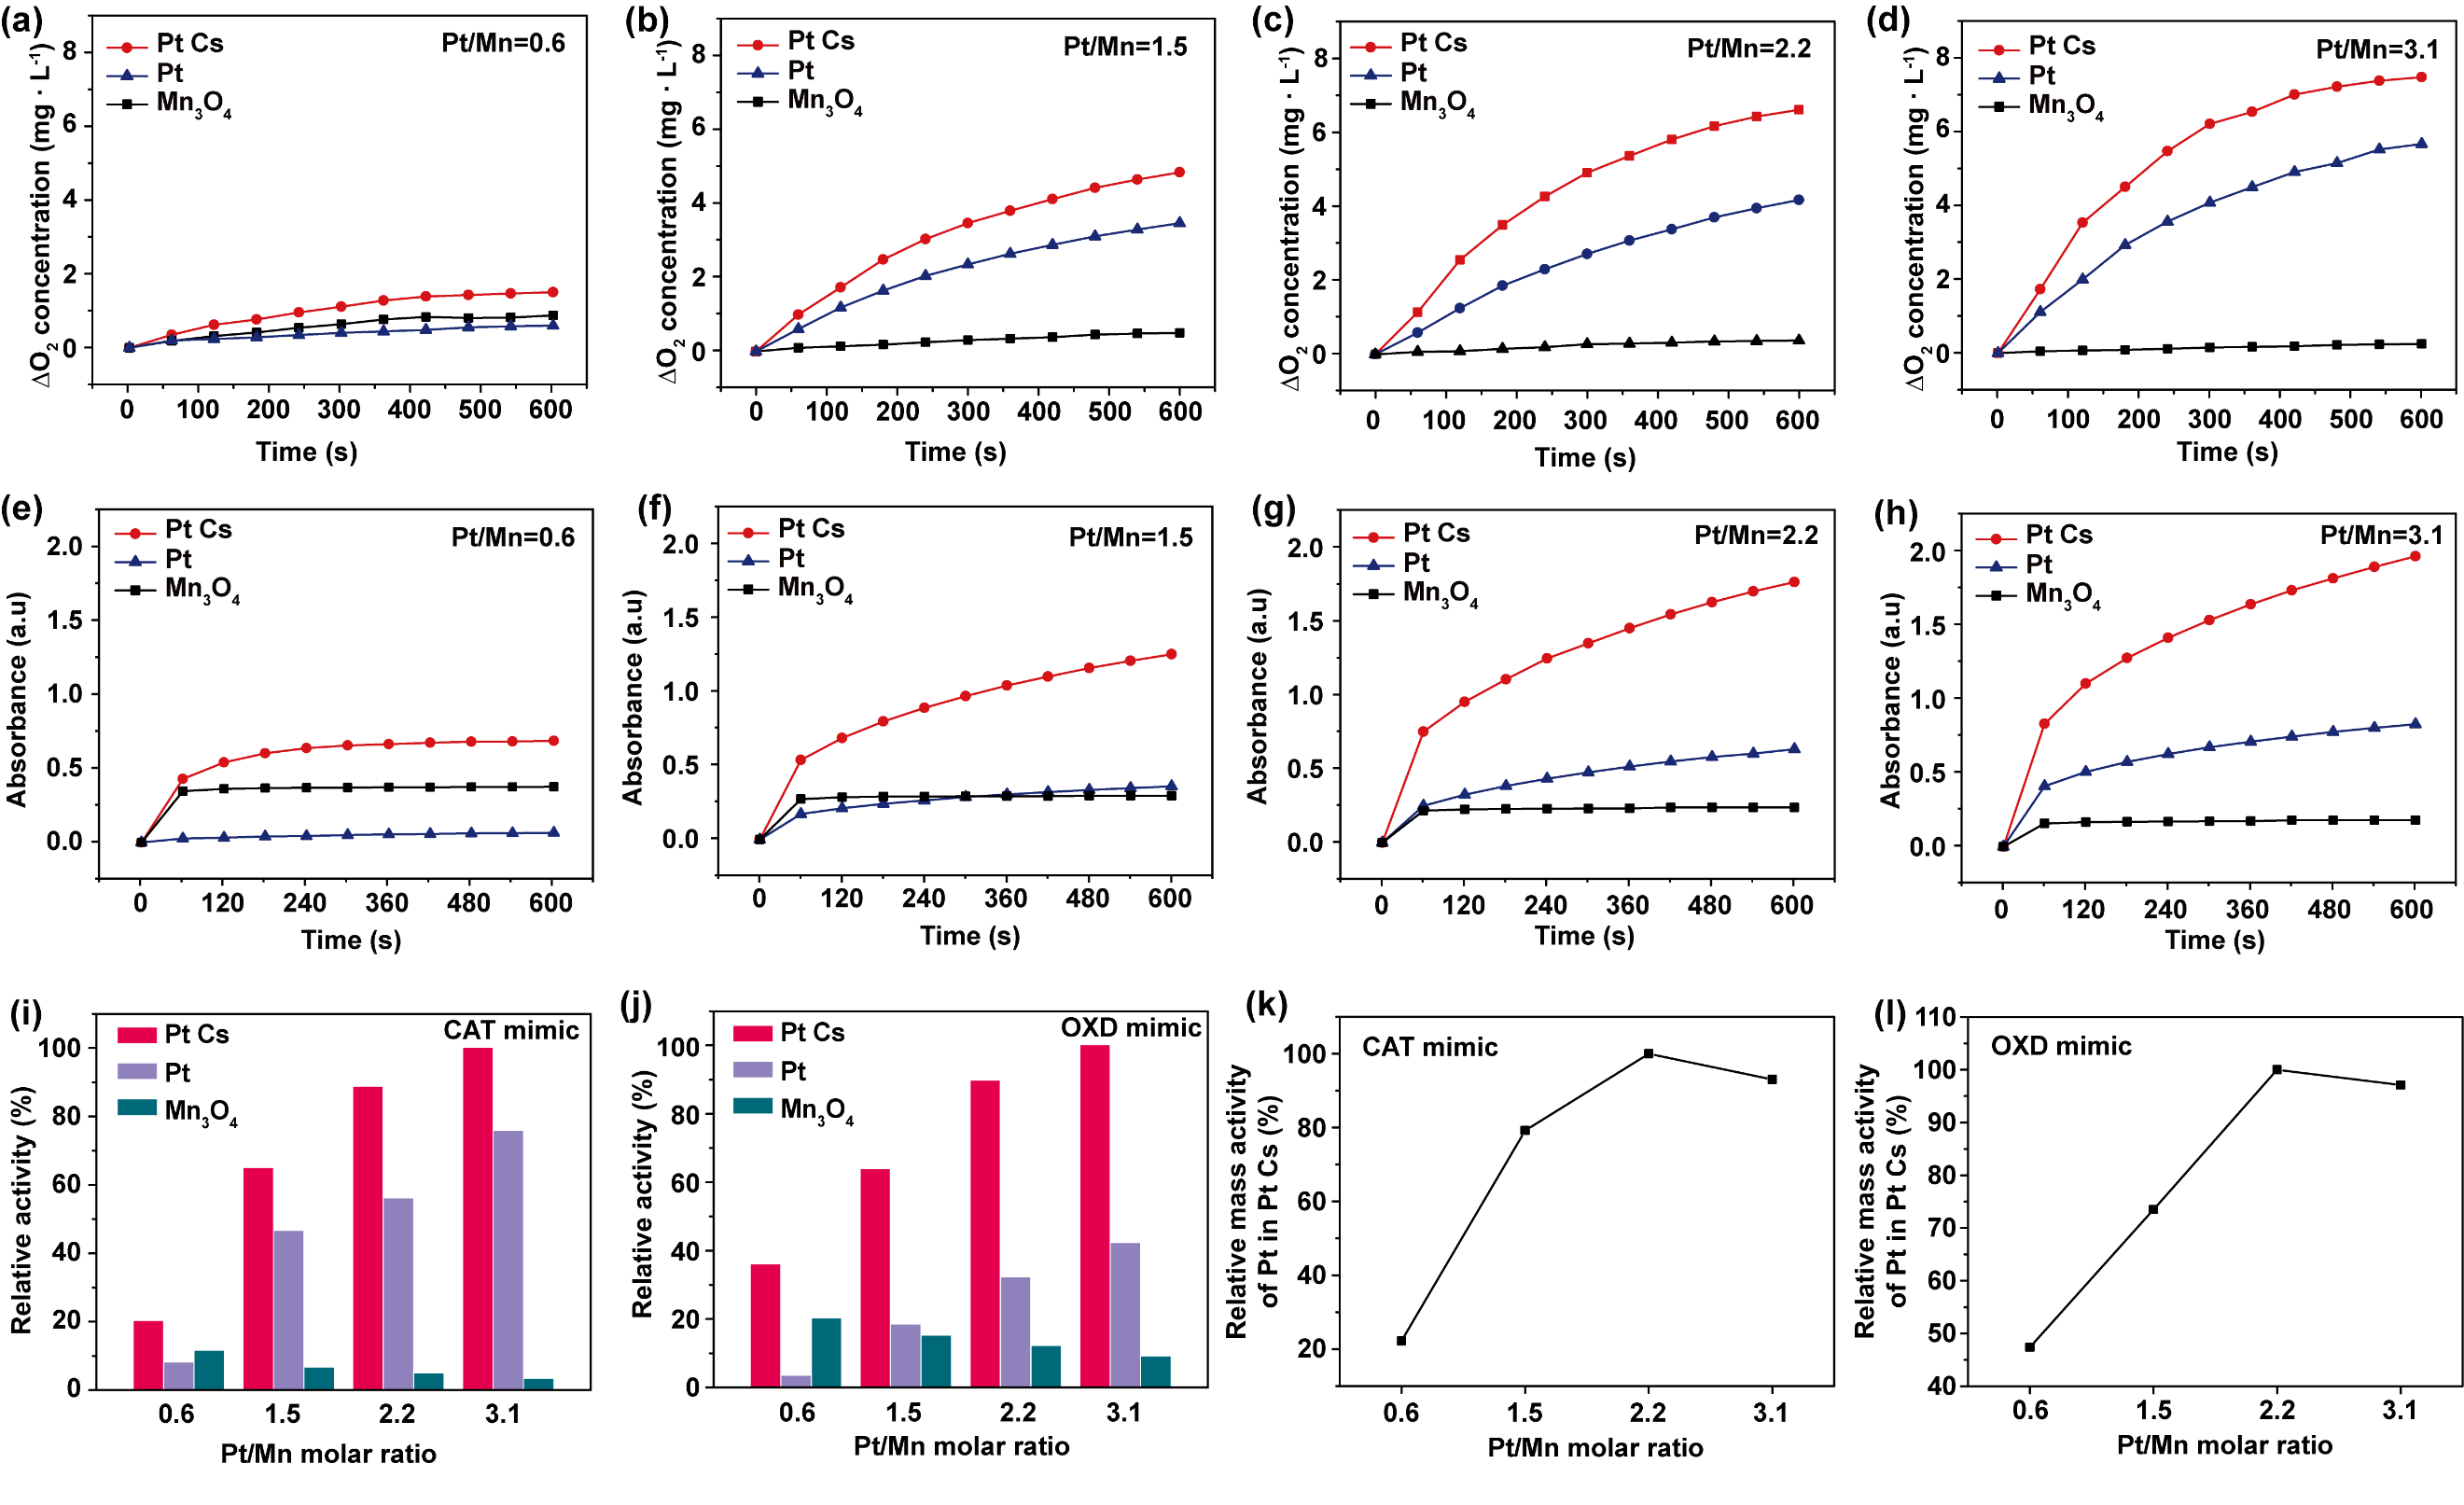


Figure S14. Analysis of the OXD mimic and CAT mimic activity of Pt Cs with different Pt/Mn molar ratio. The production of O2 under different Pt/Mn molar ratio: (a) Pt/Mn = 0.6; (b) Pt/Mn = 1.5; (c) Pt/Mn = 2.2; (d) Pt/Mn = 3.1; Time-dependent absorbance changes at 652 nm of TMBox under different Pt/Mn molar ratio: (e) Pt/Mn = 0.6; (f) Pt/Mn = 1.5; (g) Pt/Mn = 2.2; (h) Pt/Mn = 3.1. The relative activity of Pt Cs, Pt and Mn3O4 after data normalization for different enzyme-like mimics: (i) CAT mimic, (j) OXD mimic. For Pt Cs with different Pt/Mn molar ratios, the relative mass activity of Pt as an (k) CAT mimic or (l) OXD mimic. The maximum point in each curve was set as 100%.

We compared the enzyme-like activities between different Pt Cs and other controls including the sole Mn3O4 NPs and Pt NPs. In Figure S14(a)–S14(d), with the rising of Pt/Mn molar ratio from 0.6 to 3.1, the concentration of O2 generated from H2O2 increases obviously in 10 min. The phenomenon is similar to the observation for the sole Pt NPs which show a poor CAT mimic activity. The oxygen concentration is almost unchanged in the groups of the sole Mn3O4 NPs. This confirms that the content of Mn3O4 in Pt Cs has no positive role in catalysis production of oxygen. Meanwhile, Figure S14(e)–S14(h) shows the similar trend for OXD mimic activities of Pt Cs, Mn3O4 NPs and Pt NPs. With the decreasing of Mn ratio, the slight contribution of Mn3O4 content to the decomposition of oxygen can be neglected in the experiments. Figure S9 also confirms that only the collective structure of Pt Cs can support the excellent catalytic performances as CAT and OXD mimics.

To optimize the Pt/Mn ratio of Pt Cs, we selected four kinds of Pt Cs with different Pt/Mn molar ratios in our experiments to analyze their catalytic activities (Figure S14(i)–S14(j)). By comparing the catalytic activities of the Pt in these Pt Cs, we obtained the optimal Pt/Mn molar ratio of the structure. For Pt Cs as an CAT mimic, the relative activities are 22.2% （Pt/Mn = 0.6）, 79.2% （Pt/Mn = 1.5）, 100% （Pt/Mn = 2.2）and 93.0% （Pt/Mn = 3.1）, respectively. Similarly, the relative activities for OXD mimic are 47.4%（Pt/Mn = 0.6），73.5%（Pt/Mn = 1.5），100%（Pt/Mn = 2.2）and 97.1%（Pt/Mn = 3.1）, respectively. In these results, for OXD mimic and CAT mimic, the mass activity of Pt in Pt Cs increased continuously with increasing Pt/Mn molar ratio, and reached the peak value at the molar ratio of 2.2. However, when the Pt/Mn molar ratio was further increased, the mass activity of Pt also jumped down (Figure S14(k)–S14(l)). In our experiments, the ratio of the Pt/Mn of 2.2 was selected for most catalytic tests.


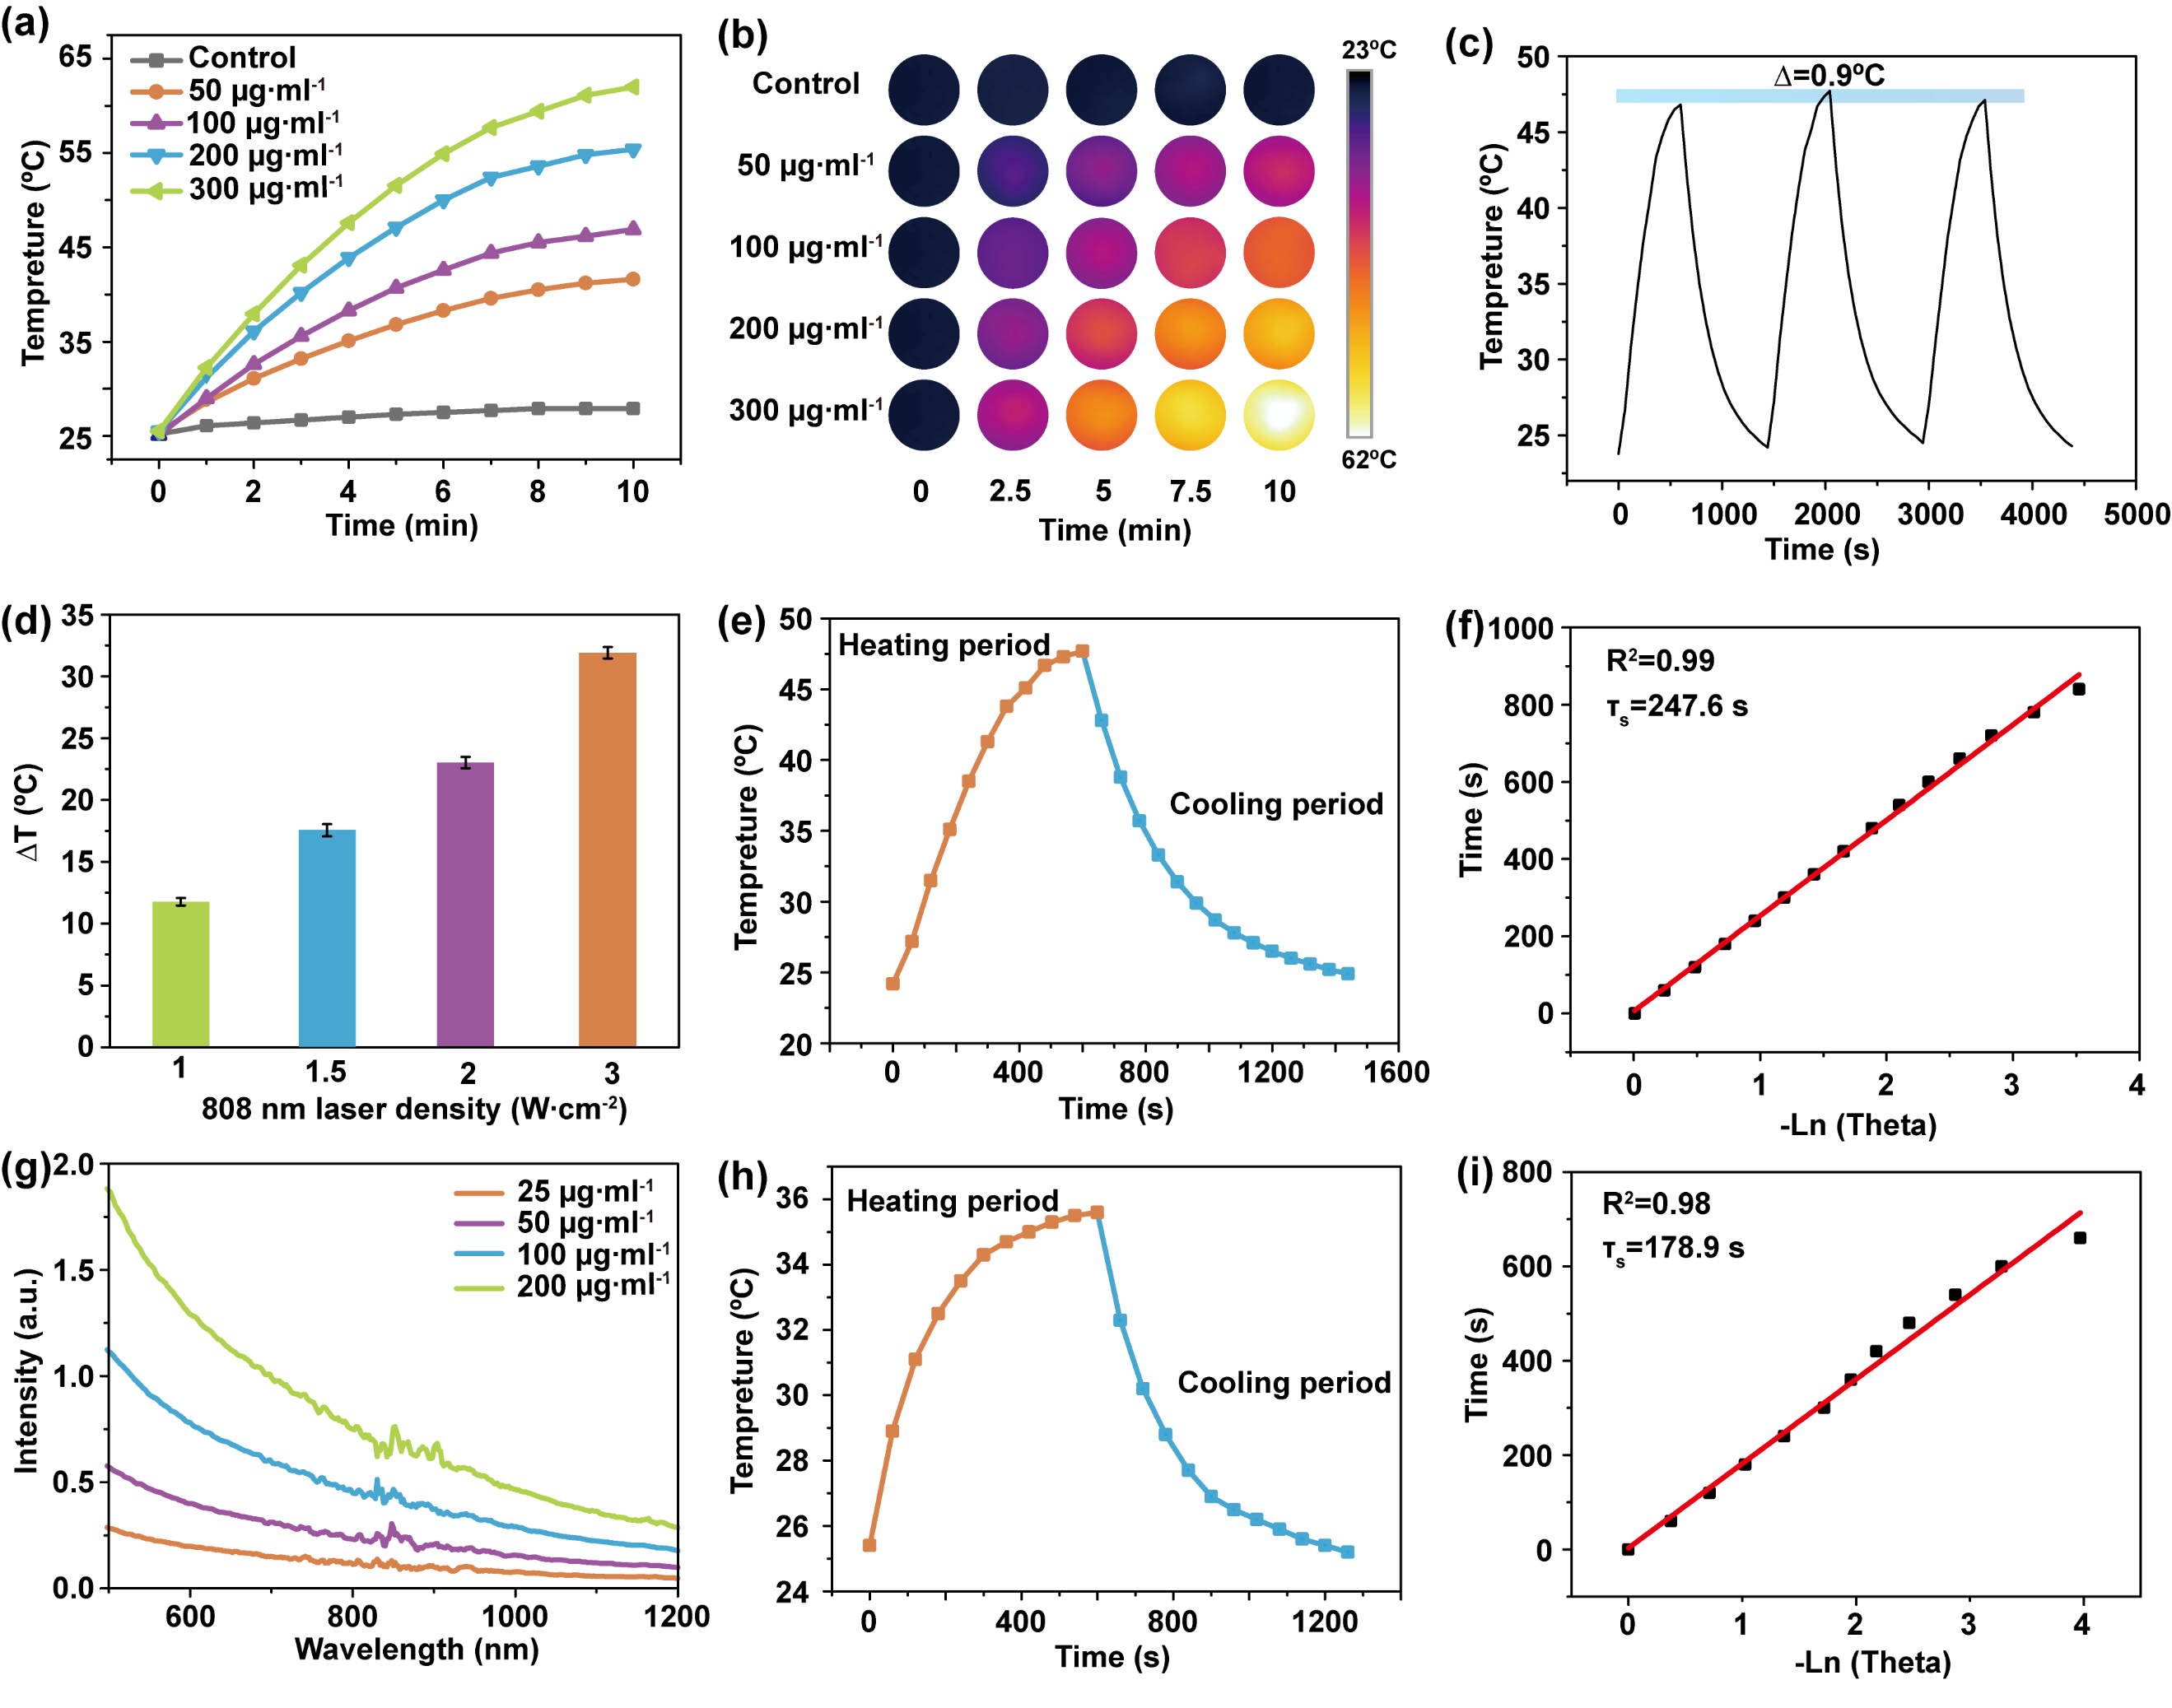


Figure S15. Photothermal effect of the Pt Cs. (a) Temperature change curves of water with different concentrations of Pt Cs in 10 min (808 nm laser power density is 2 W·cm–2). (b) Infrared thermal images of the Pt Cs aqueous solution with different concentration under irradiation by 808 nm laser (2 W·cm–2). (c) Recycling-heating profiles of the Pt Cs aqueous solution after 808 nm laser irradiation for three laser on/off cycles. (d) Temperature change (ΔT) of the Pt Cs solution (100 μg·mL–1) with various laser power densities (1, 1.5, 2, 3 W·cm−2) over a period of 600 s. (e) Heating and cooling curve of the aqueous dispersion of the Pt Cs under 808 nm laser irradiation (2 W·cm–2). (f) The time constant (τs) for heat transfer from the system was determined by applying the linear time data from the cooling period for Pt Cs. (g) UV–vis–NIR absorption spectra of R-Pt Cs at different concentrations. (h) Heating and cooling curve of an aqueous dispersion of the R-Pt Cs under 808 nm laser irradiation (2 W·cm–2). (i) The τs for heat transfer from the system was determined by applying the linear time data from the cooling period for R-Pt Cs.

To investigate the photothermal effect for Pt Cs, the 808 nm laser was selected to trigger the photothermal conversion for different aqueous suspension of Pt Cs in 10 min (Figure S15(a)). When the Pt Cs concentration is fixed at 100 μg·mL−1, the temperature can increase from 25℃ to 46.9℃ which has been regarded as the tipping point for the apoptosis of tumor cells. In the case of the control group of deionized water, temperature just slightly increases by 2.7℃. Real-time infrared thermal images also confirm this trend (Figure S15(b)). The photothermal effect in Pt Cs aqueous solution was evaluated under different 808 nm laser power densities (Figure S15(d)), and the results showed that Pt Cs display an obvious laser-power-dependent photothermal performance. In addition, after three cycles of heating and cooling, the photothermal conversion capability of the Pt Cs still remains robust (Figure S15(c)), which revealed the high photothermal stability of the Pt Cs. Furthermore, the photothermal conversion capability was evaluated. The time constant for heat transfer from the system was calculated to be *τs* = 247.6 s by employing the linear time data from the cooling period versus negative natural logarithm of driving force temperature, which was acquired from the cooling stage of the panel. The *η* of the Pt Cs was calculated to be nearly 23.9% at 808 nm (Figure S15(e) and S15(f)). It is worth noting that the time constant (*τs*) and *η* of R-Pt Cs calculated by the same method are 178.9 s and 18.9% (Figure S15(h) and S15(i)).


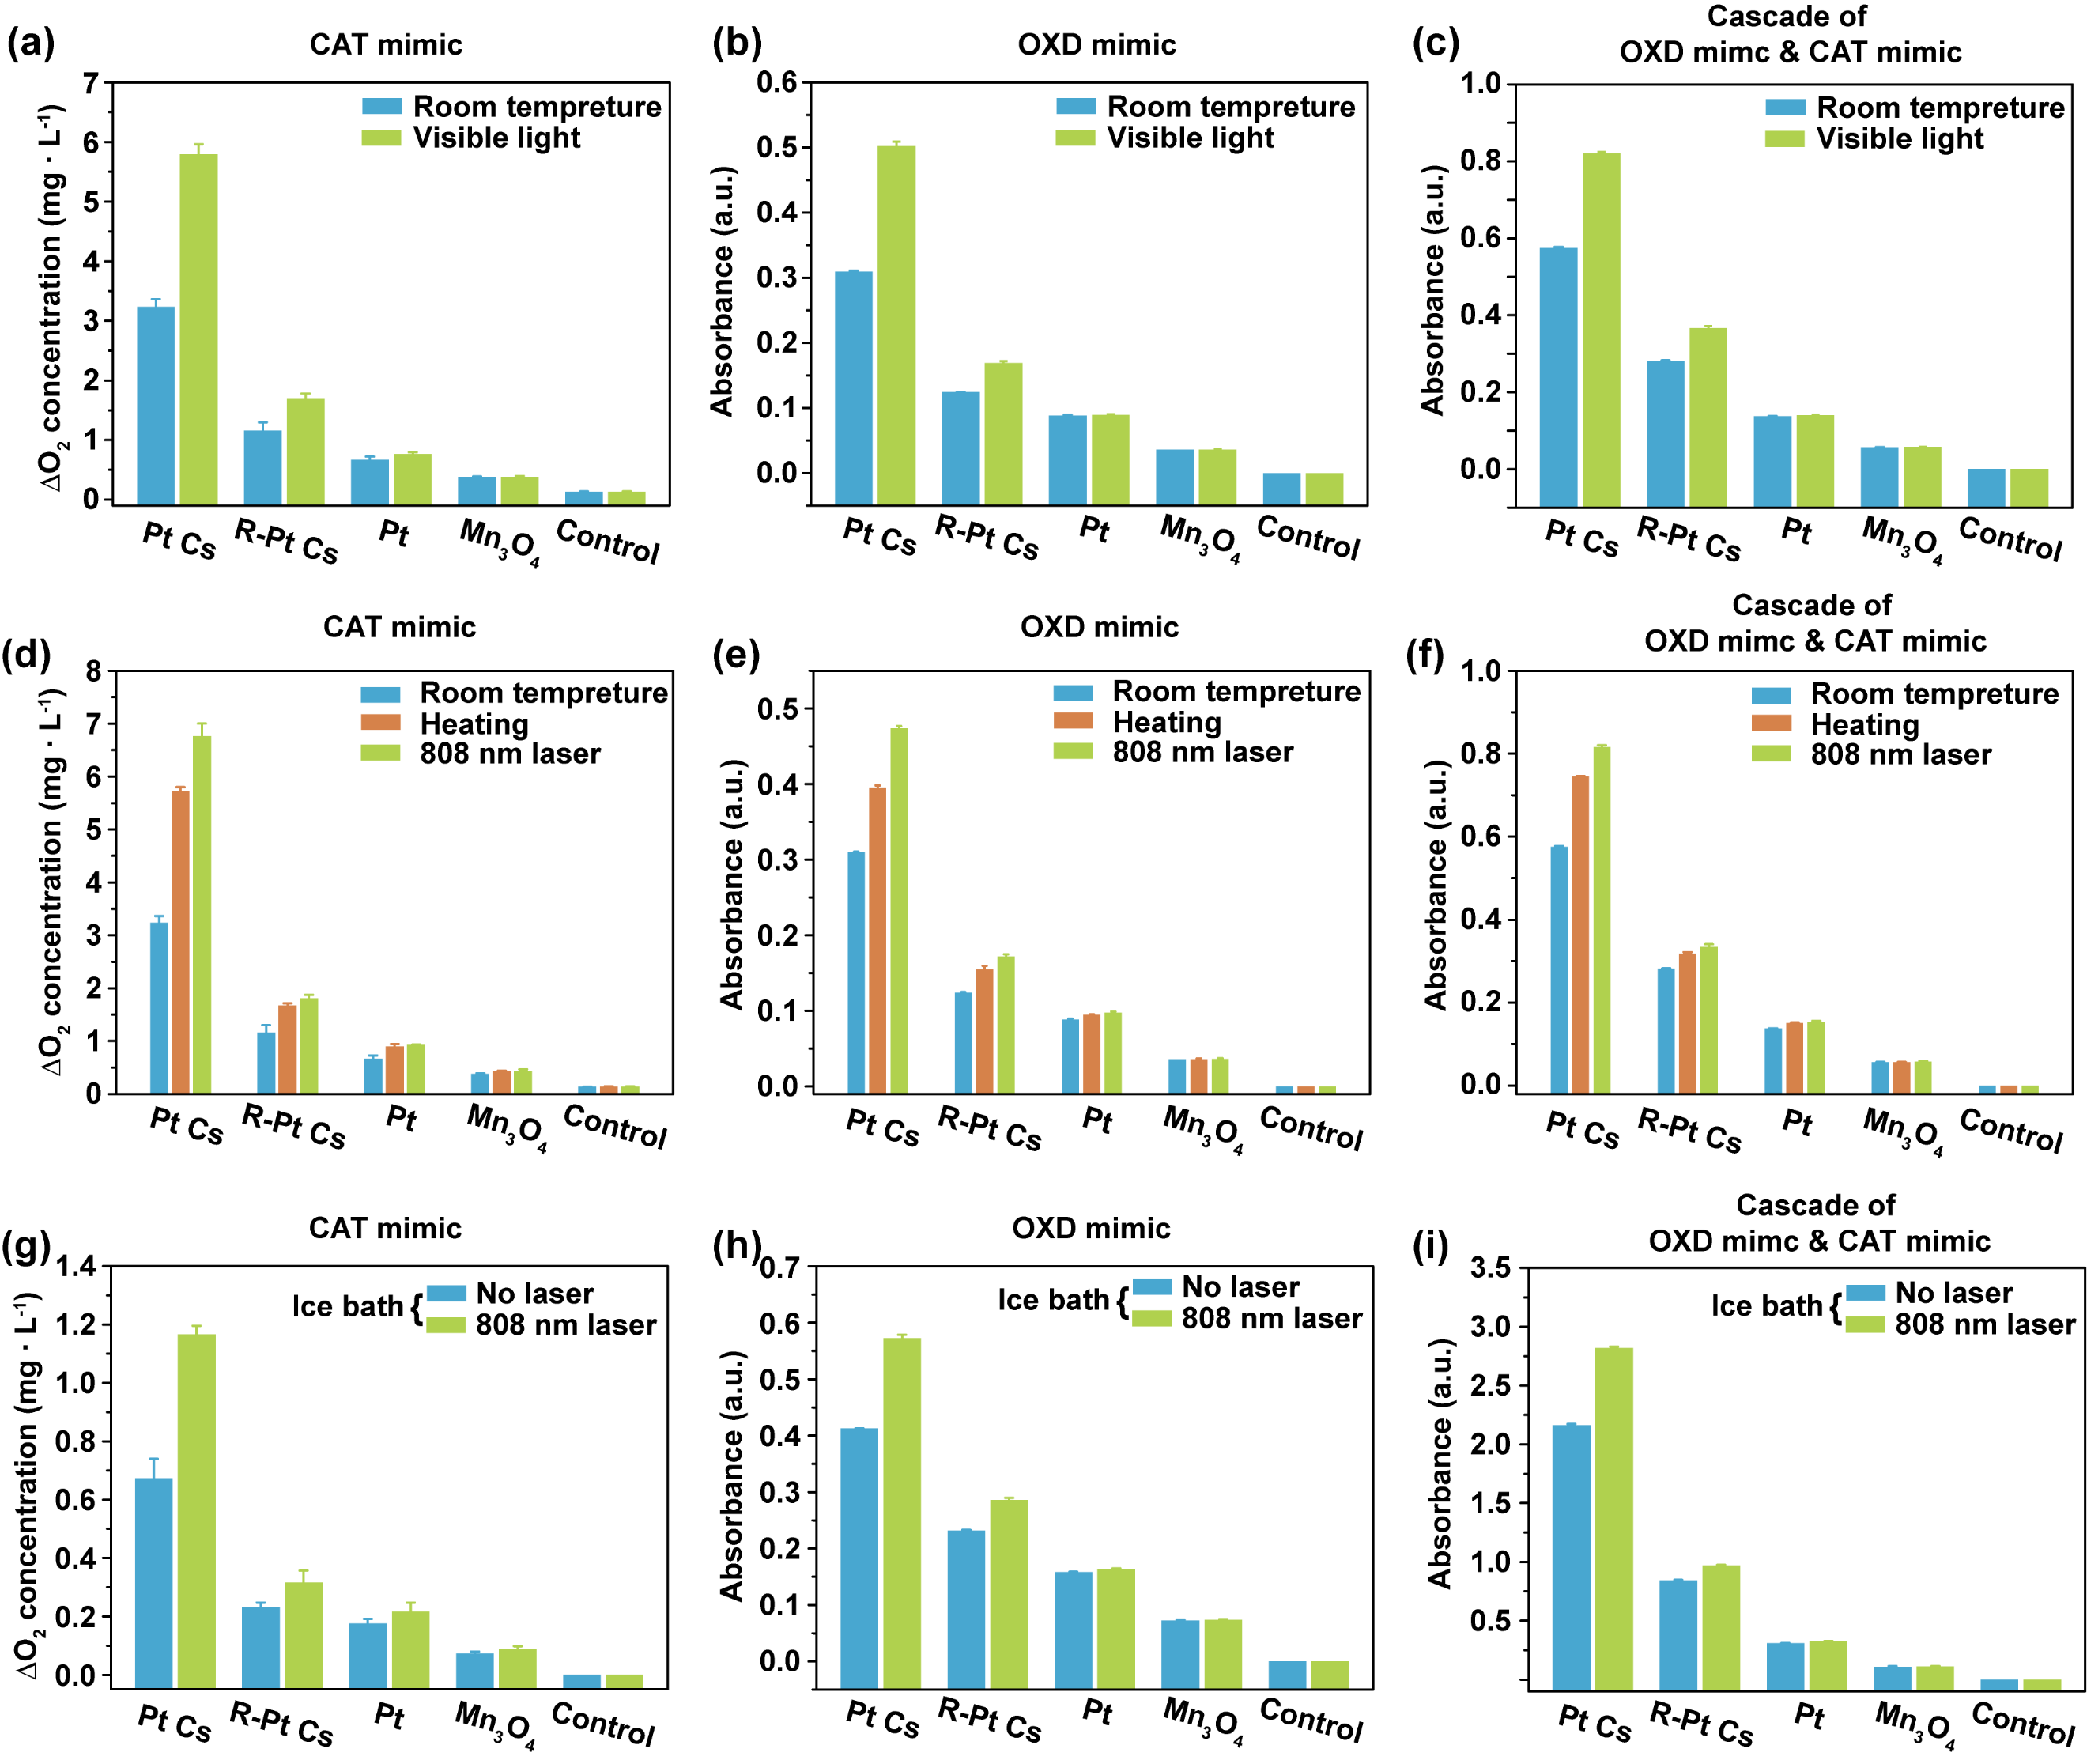


Figure S16. The activities of different enzyme-like mimics for Pt Cs with and without visible light irradiation at room temperature: (a) CAT mimic, (b) OXD mimic and (c) cascade of CAT mimic and OXD mimic. The activities of different enzyme-like mimics for Pt Cs at under various conditions of 808 nm laser irradiation, no light irradiation and water bath heating: (d) CAT mimic, (e) OXD mimic and (f) cascade of CAT mimic and OXD mimic. The activities of different enzyme-like mimics for Pt Cs with and without 808 nm laser irradiation under ice bath condition: (g) CAT mimic, (h) OXD mimic and (i) cascade of CAT mimic and OXD mimic.


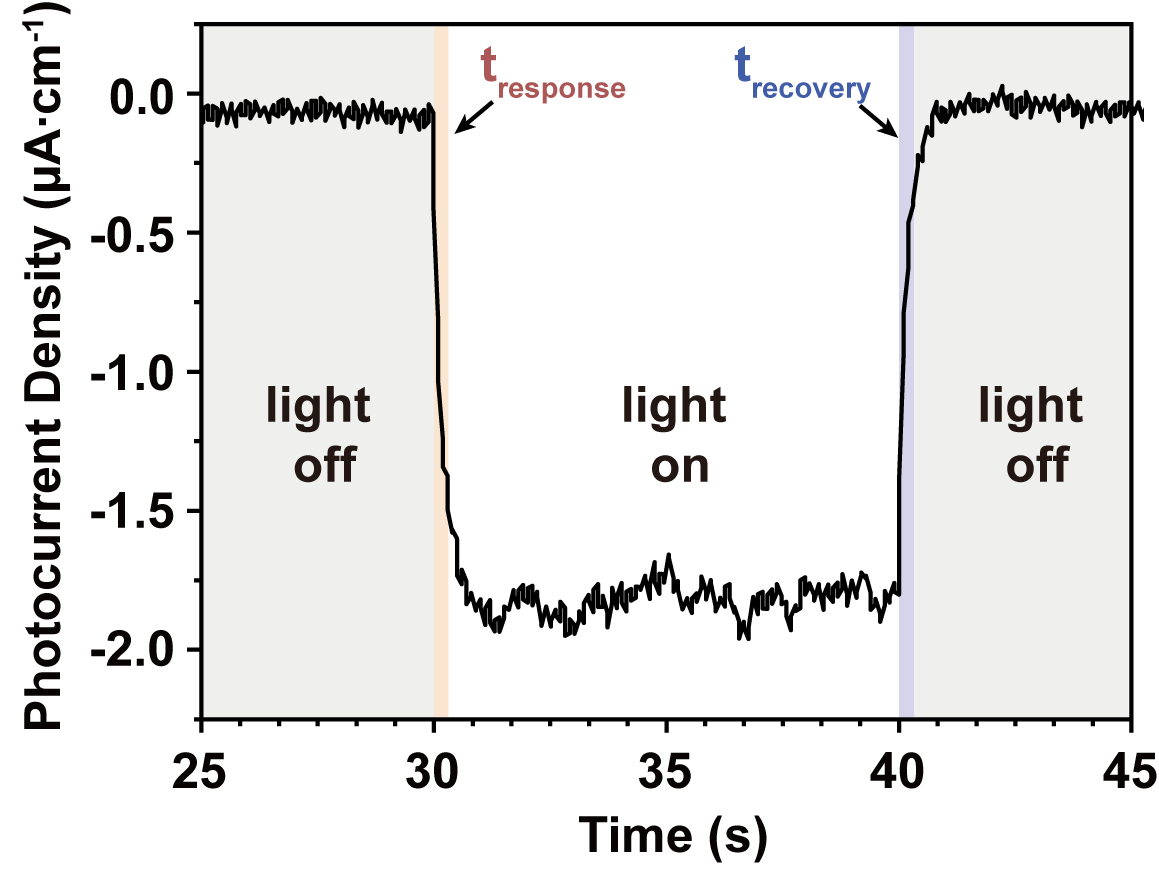


Figure S17. The on-off photocurrent curve of Pt Cs with the presentation of response time and recovery time.


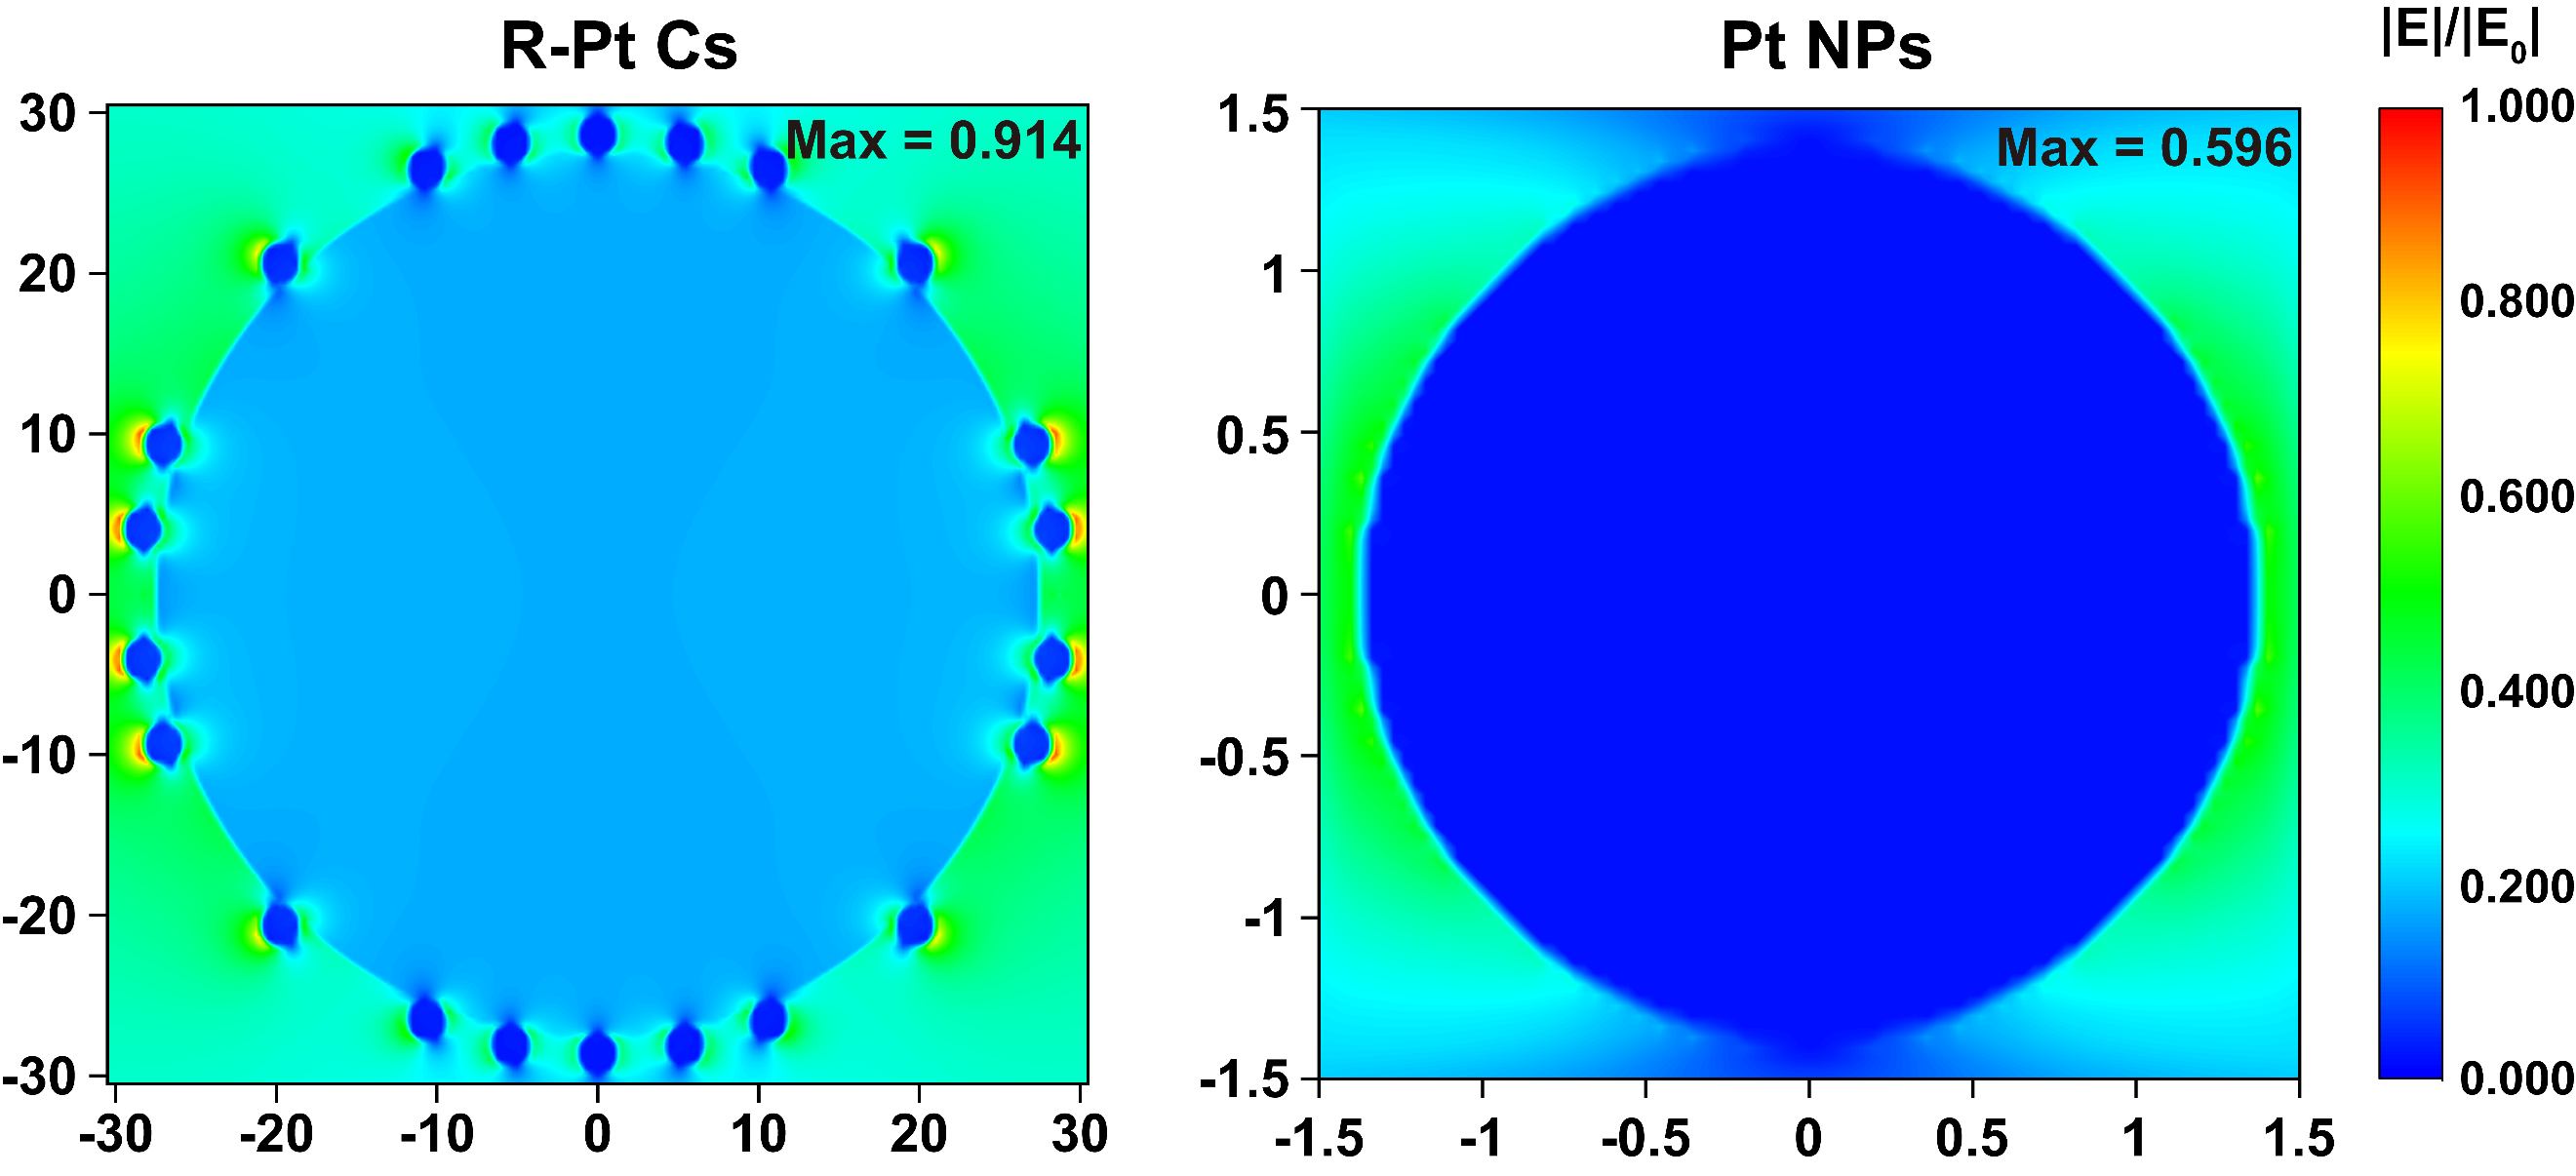


Figure S18. Comparison of electric field enhancement (|E|/|E0|) contours of R-Pt Cs and Pt NPs at 808 nm laser excitation.


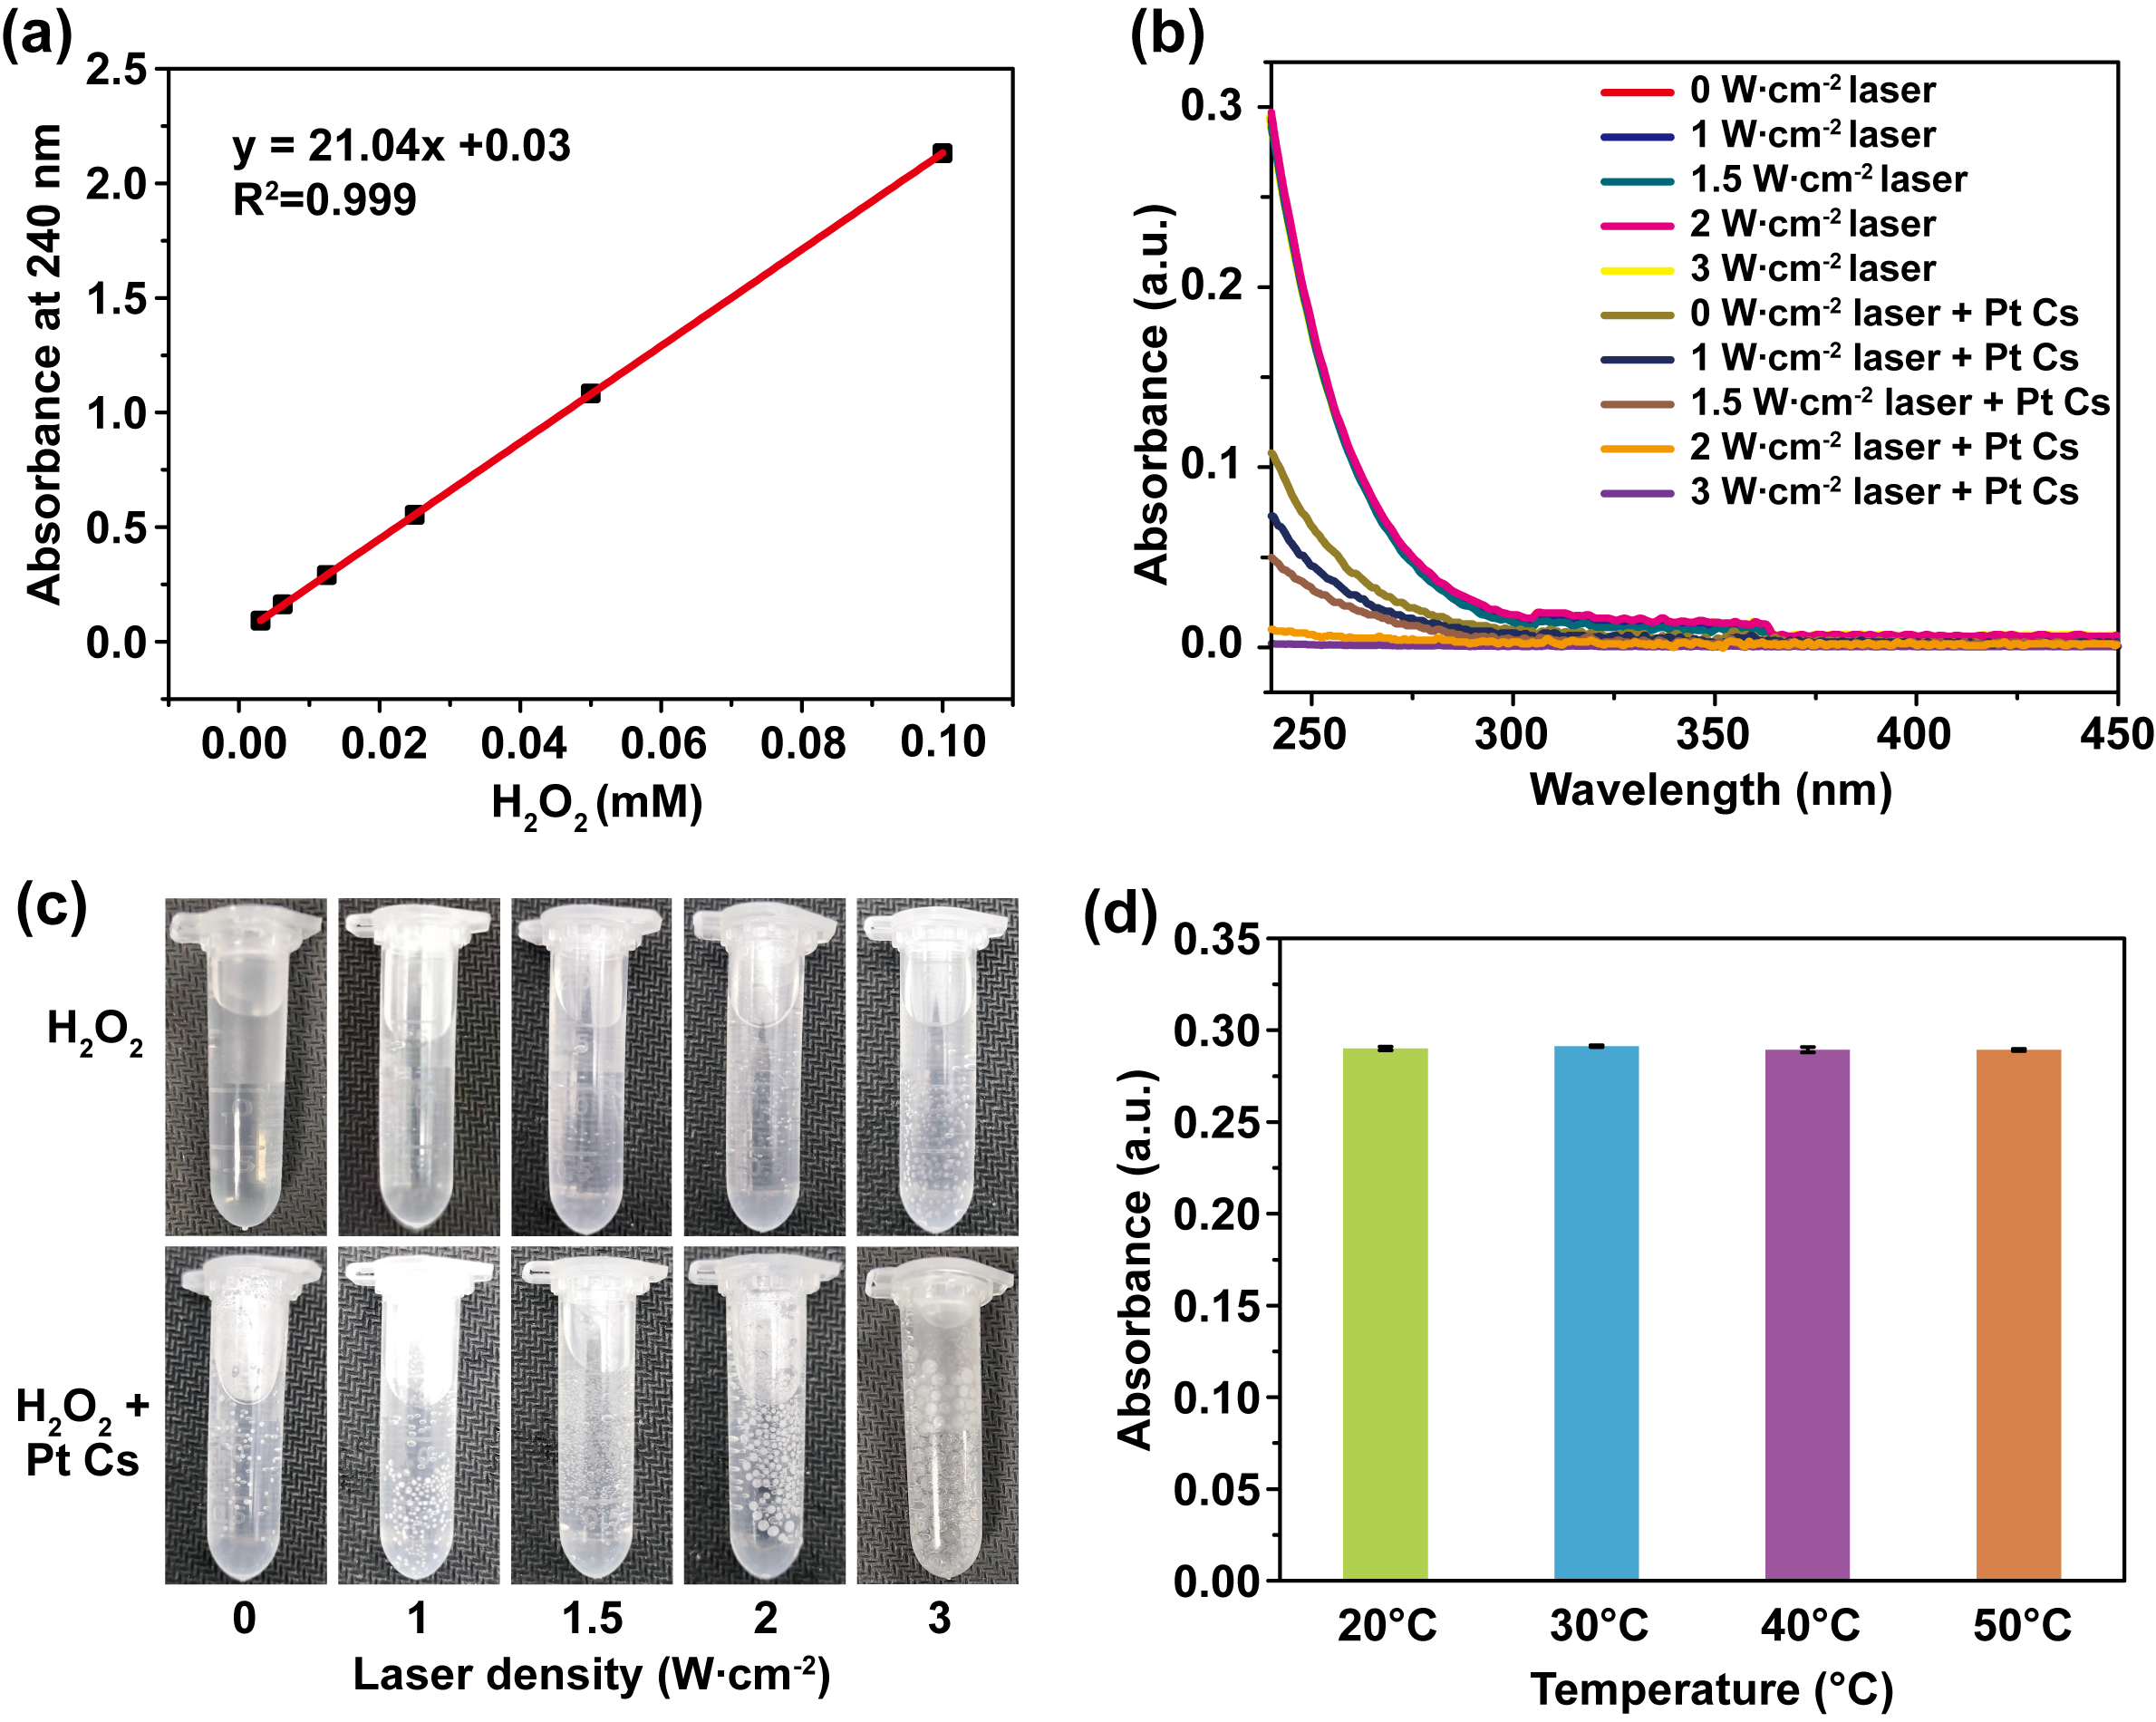


Figure S19. The O2 generation ability affected by temperature or 808 nm laser. (a) Linear relationship between absorbance at 240 nm and the concentration of H2O2. (b) The absorbance change of the H2O2 solution with various laser power density after 10 min incubation of Pt Cs or not. (c) Digital photos of generation gas bubbles with H2O2 under different laser power density after 10 min incubation of Pt Cs or not. (d) The absorbance at 240 nm of the H2O2 solution with various temperature after 10 min.

The characteristic absorption peak of H2O2 is located at 240 nm. The linear relationship between the intensity of this peak and H2O2 concentration is shown in Figure S19(a). In order to avoid the possible spontaneous decomposition of H2O2 under the 808 nm laser irradiation, the intensity of H2O2 peak was monitored in the experimental system. Figure S19(b) show that the concentration of H2O2 in the solution did not change under 808 nm laser irradiation, and no obvious bubbles were found in the corresponding sample tube (Figure S19(c)). These data verified the photostability of H2O2 in this system. However, after adding Pt Cs to the system, the concentration of H2O2 gradually decreased with the increase of the laser power density. The number of accumulated bubbles in the corresponding sample tube also increased with the increase of the laser power density, which reflects the positive effect of 808 nm laser on the CAT mimic activity of Pt Cs. Similarly, we also monitored the change of H2O2 concentration at different temperatures, Figure S19(d) showed that the change of H2O2 concentration in the system was negligible after incubation at 20–50 degrees for 10 min.


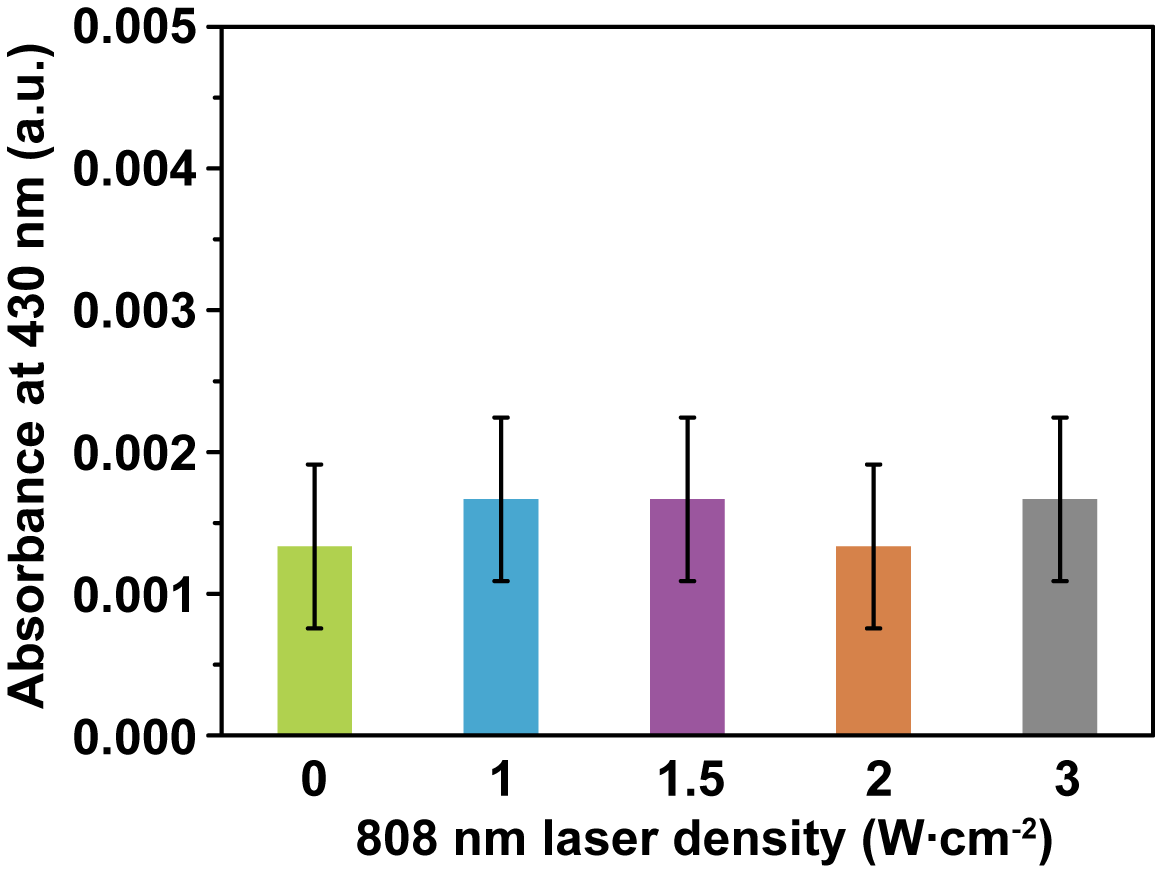


Figure S20. The characteristic absorbance change of the OPDox solution under the irradiation of 808 nm laser with different power densities in 10 min.

In the reaction system without Pt Cs, under 808 nm laser irradiation with different power densities, the characteristic absorbance change of OPDox is about 0 within 10 min, which proves that the NIR light alone can not lead to the oxidation of OPD.


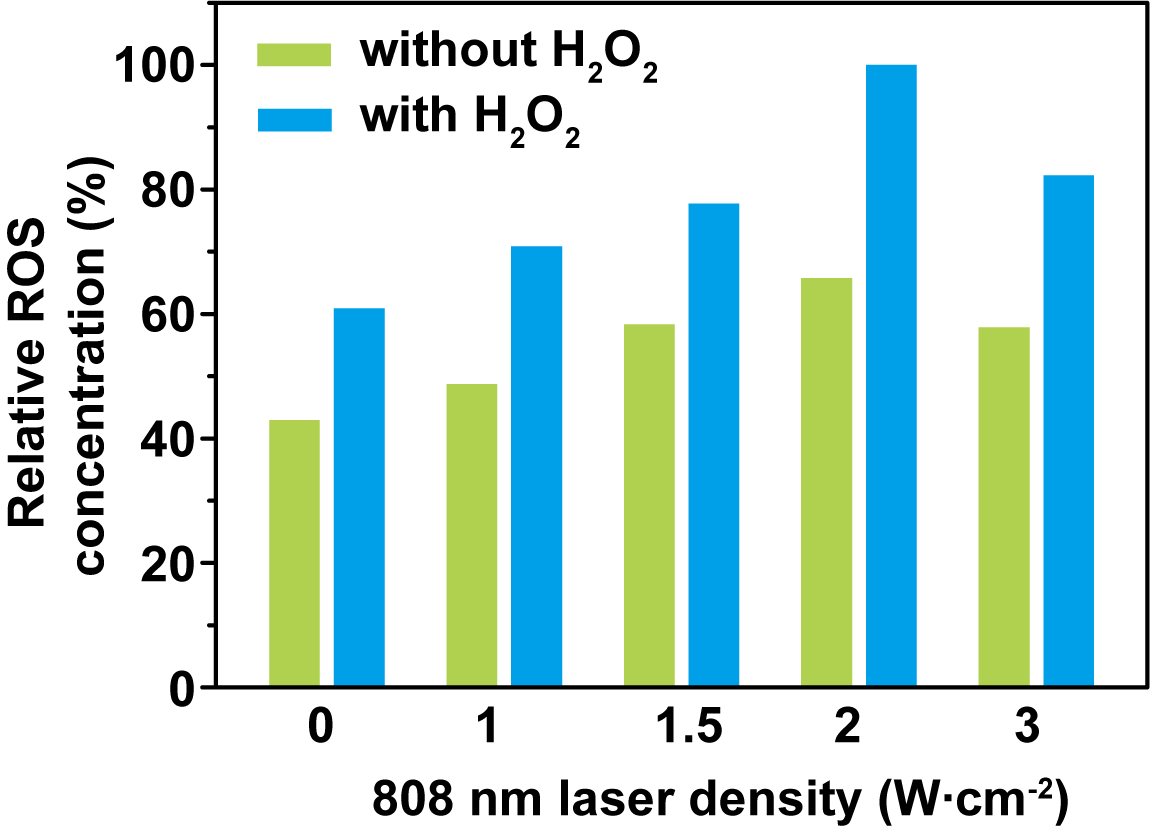


Figure S21. The relative ROS concentration in Pt Cs aqueous solution adding with or without H2O2 after data normalization;

Figure S21 shows that under 808 nm laser irradiation of different power densities, the system adding with H2O2 generates more ROS than the systems adding without H2O2. For example, under the laser irradiation of 2 W·cm−1, the ROS concentration of the system adding with H2O2 is about 1.5 times that of the system adding without H2O2. This is because of the self-cascade effect: Pt Cs firstly catalyzes the decomposition of H2O2 to increase the concentration of O2 in the system, and further promote the conversion from O2 to O2•−.


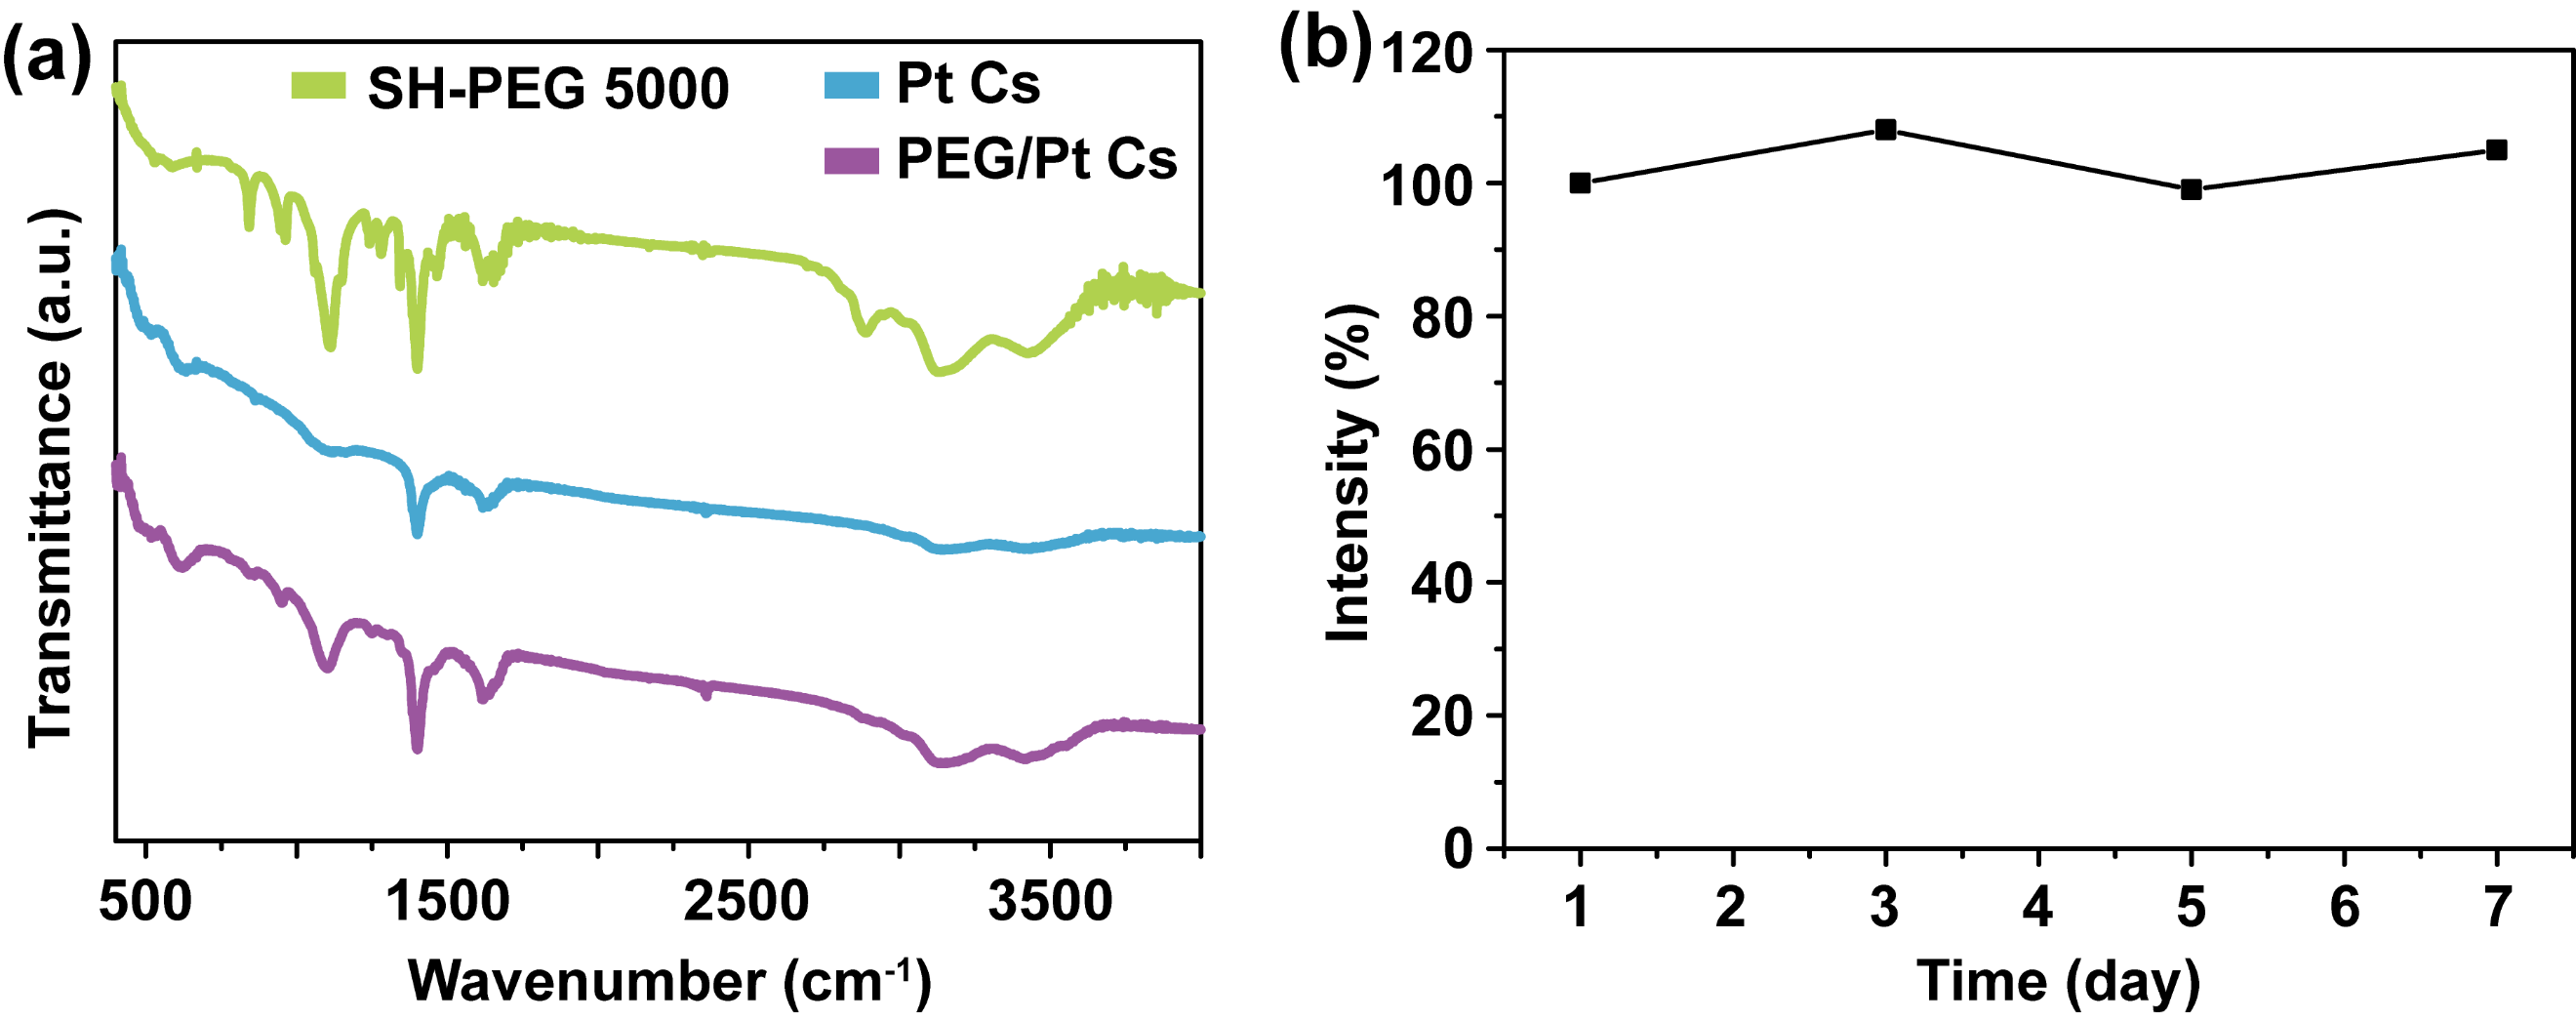


Figure S22. (a) FIIR spectra of the SH-PEG 5000, Pt Cs and PEG/Pt Cs. (b) Hydrodiameter changes of the PEG/Pt Cs dispersed in PBS solvents, the size of PEG/Pt Cs in day 1 was set as 100%.


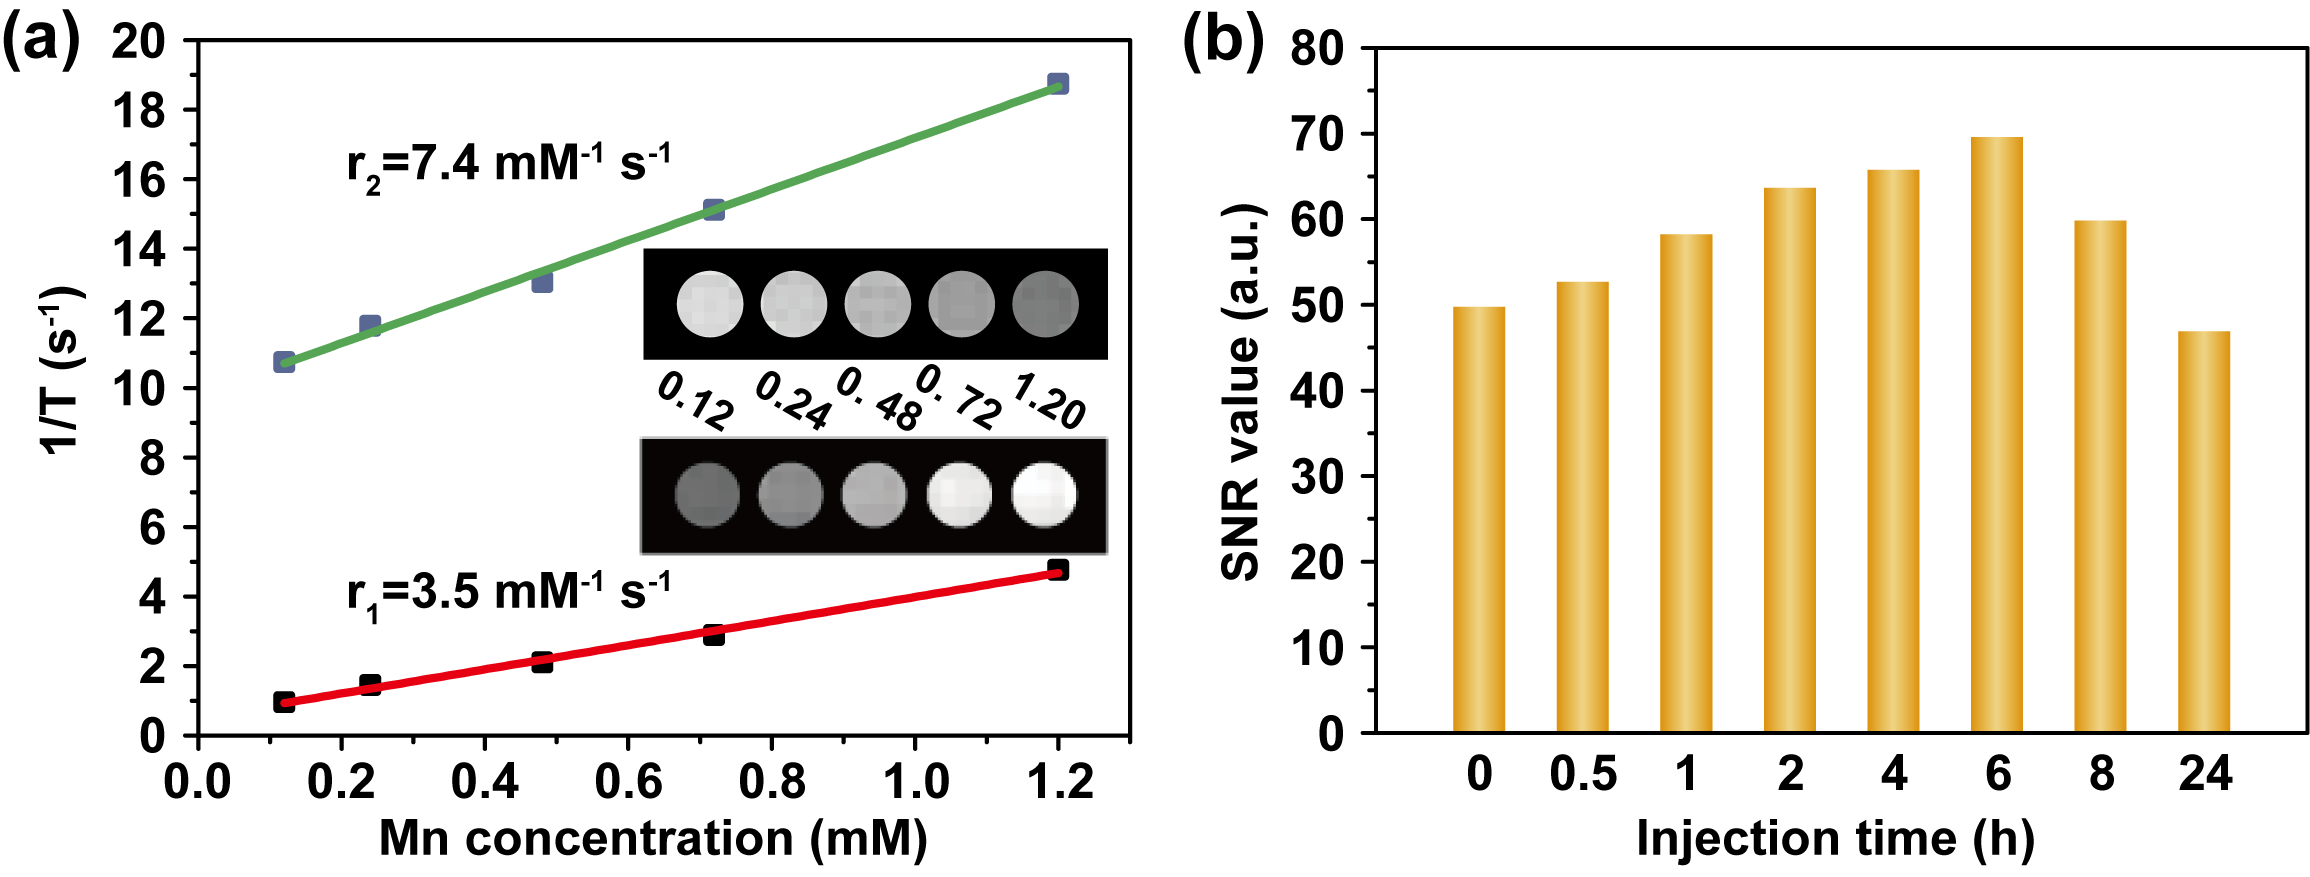


Figure S23. (a) 1/T curves of PEG/Pt Cs vs concentration of manganese ions. (b) Change in the signal-to-noise ratio (SNR) in the mouse after injection of PEG/Pt Cs.


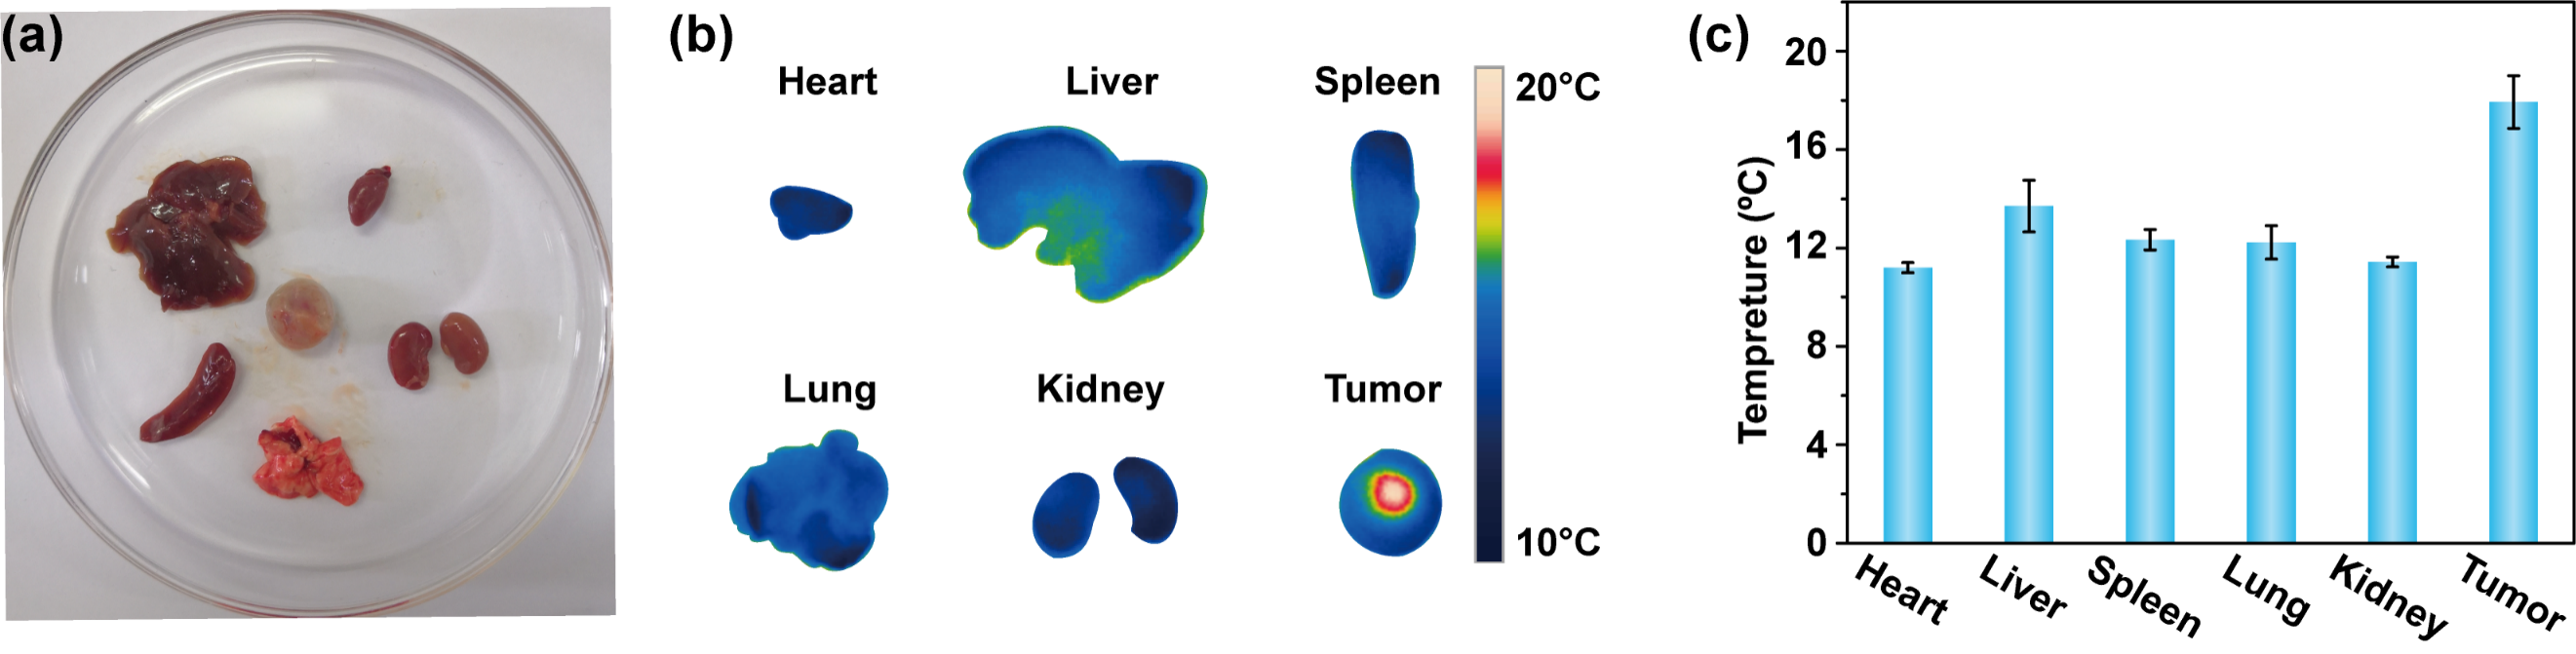


Figure S24. Infrared imaging of mice organs dissected after 6 h injection (a) Digital photos of mice organs and tumor dissected. (b) the corresponding infrared thermal images of mice organs and tumor under laser irradiation after 6 h injection and (c) the temperature of corresponding mice organ.


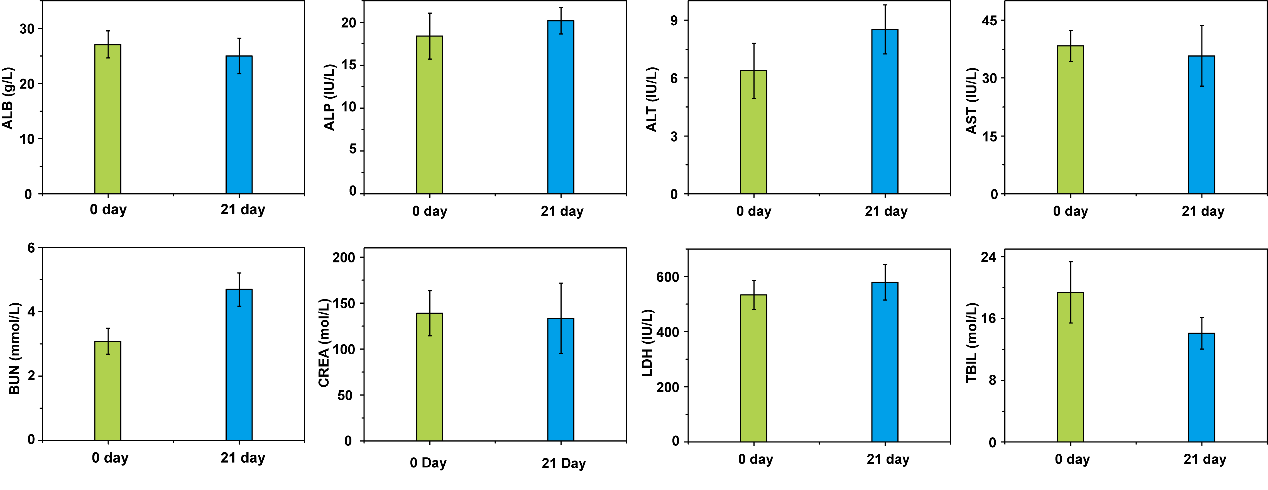


Figure S25. Blood biochemical and haematological analysis of the healthy mice intravenously before injection and at 21 days post-injection.


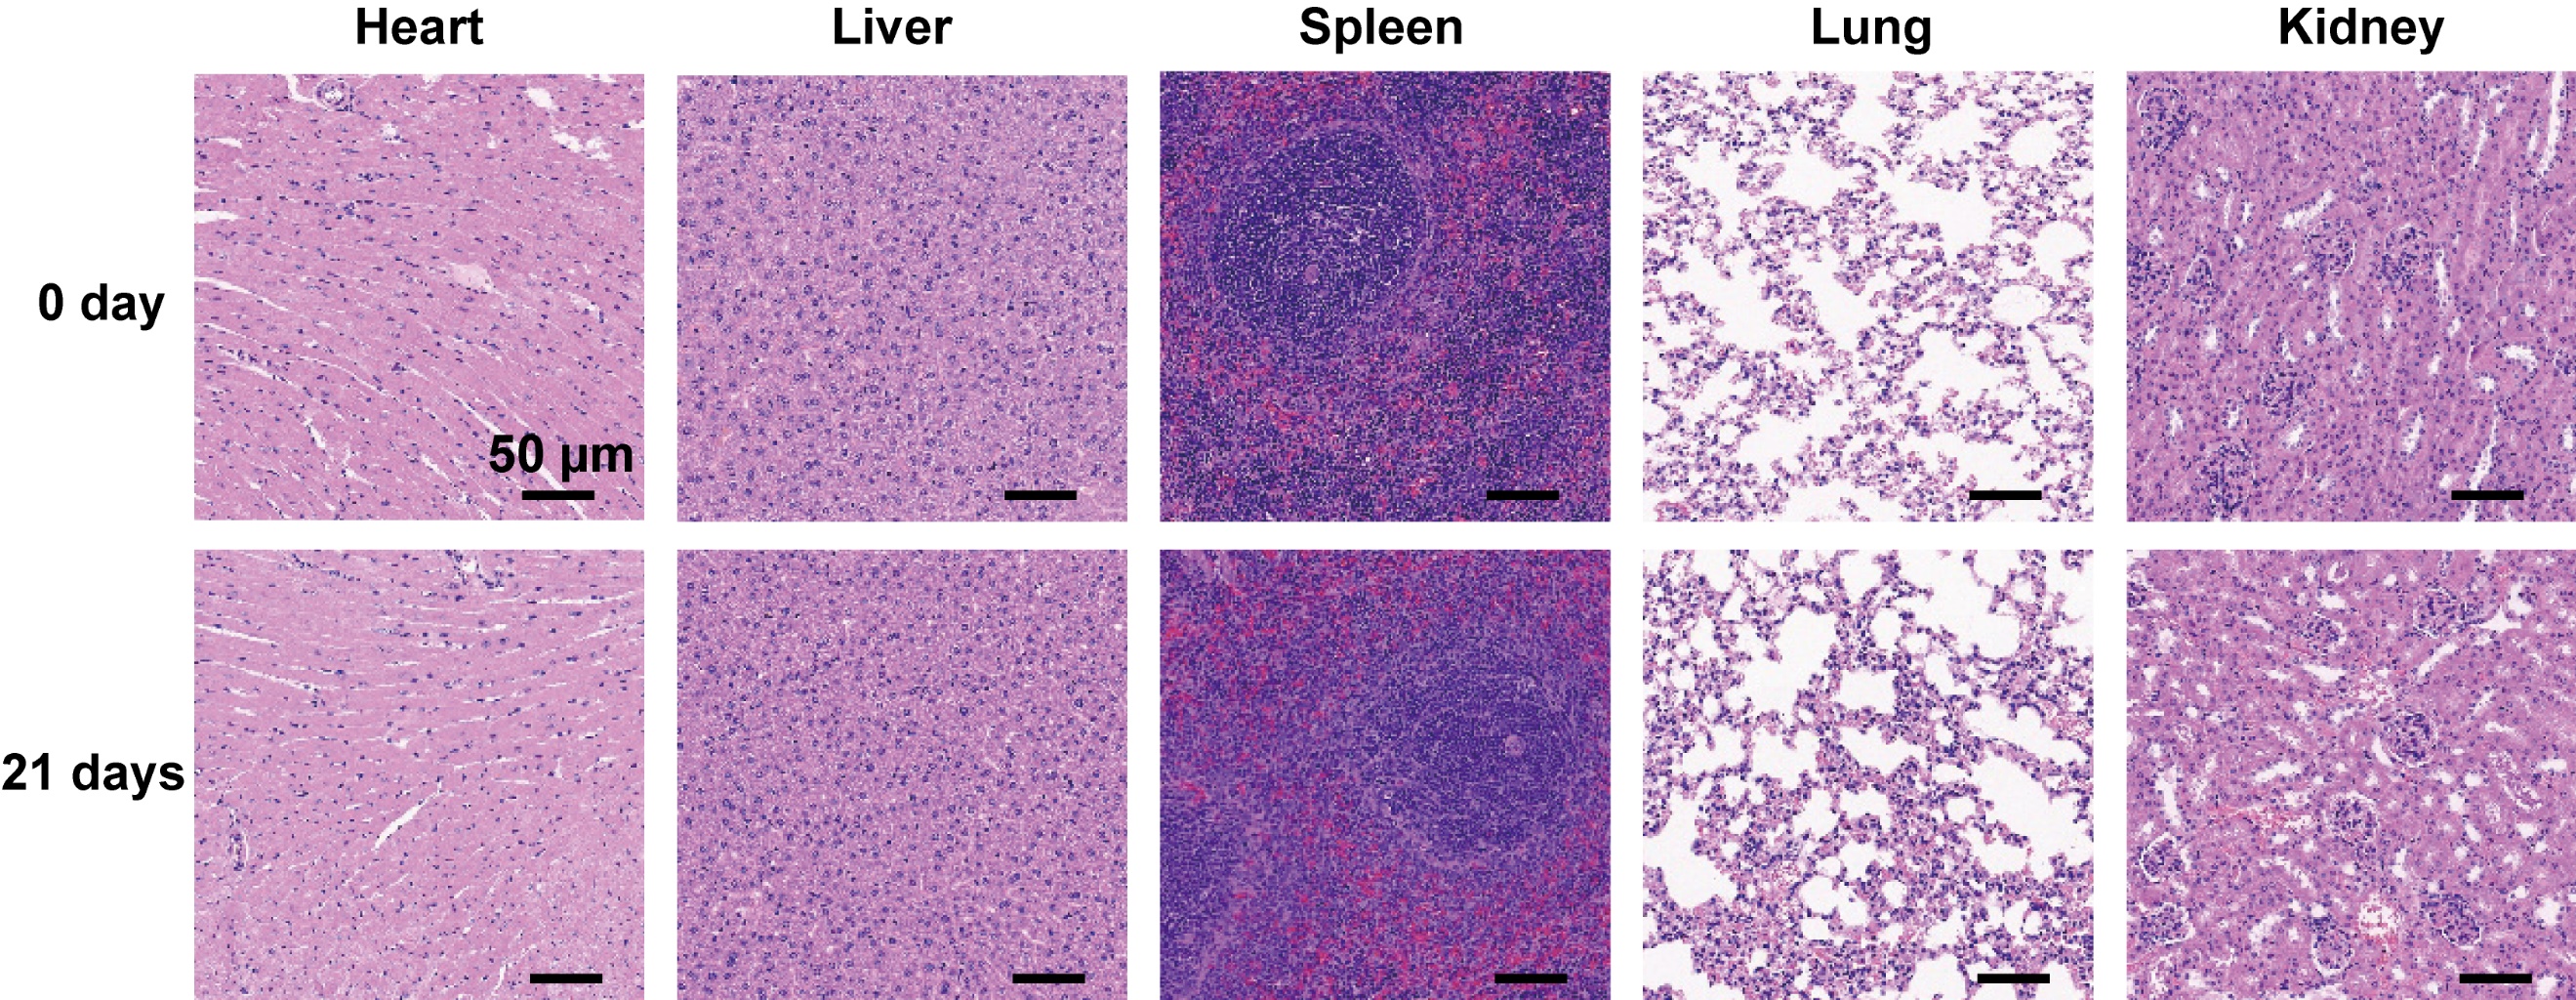


Figure S26. H&E images obtained from the major organs of the PEG/Pt Cs-treated mice before injection and at 21 days post-injection.

**Reference**

1. Kresse G, Furthmüller J. Efficient iterative schemes for ab initio total-energy calculations using a plane-wave basis set. *Phys. Rev. B* 1996, **54**(16)**:** 11169.

2. Perdew JP, Burke K, Ernzerhof M. Generalized gradient approximation made simple. *Phys. Rev. Lett.* 1996, **77**(18)**:** 3865.

3. Klimeš J, Bowler DR, Michaelides A. Van der Waals density functionals applied to solids. *Phys. Rev. B* 2011, **83**(19)**:** 195131.

4. Roper DK, Ahn W, Hoepfner M. Microscale heat transfer transduced by surface plasmon resonant gold nanoparticles. *J. Phys. Chem. C* 2007, **111**(9)**:** 3636-3641.

5. Jiang B, Duan D, Gao L, Zhou M, Fan K, Tang Y, Xi J, Bi Y, Tong Z, Gao GF. Standardized assays for determining the catalytic activity and kinetics of peroxidase-like nanozymes. *Nat. Protocols* 2018, **13**(7)**:** 1506-1520.

6. Patra T, Panda J, Sahoo TR. Synthesis of Mn3O4 nanoparticles via microwave combustion route for electrochemical energy storage application. *Mater. Today* 2021, **41:** 247-250.

7. Wang JG, Jin D, Zhou R, Li X, Liu XR, Shen C, Xie K, Li B, Kang F, Wei B. Highly flexible graphene/Mn3O4 nanocomposite membrane as advanced anodes for Li-ion batteries. *ACS Nano* 2016, **10**(6)**:** 6227-6234.

8. Lu W, Chen J, Kong L, Zhu F, Feng Z, Zhan J. Oxygen vacancies modulation Mn3O4 nanozyme with enhanced oxidase-mimicking performance for l-cysteine detection. *Sens. Actuat. B-Chem.* 2021, **333**.

9. Zhu Y, Wang Z, Zhao R, Zhou Y, Feng L, Gai S, Yang P. Pt decorated Ti3C2Tx MXene with NIR-II light amplified nanozyme catalytic activity for efficient phototheranostics. *ACS Nano* 2022, **16**(2)**:** 3105-3118.

10. An G, Yu P, Xiao M, Liu Z, Miao Z, Ding K, Mao L. Low-temperature synthesis of Mn3O4 nanoparticles loaded on multi-walled carbon nanotubes and their application in electrochemical capacitors. *Nanotechnology* 2008, **19**(27)**:** 275709.
